# Supplementary material for: Patient-reported outcome measures for knowledge transfer and behaviour modification interventions in type 2 diabetes—the INDICA study: a multiarm cluster randomised controlled trial
Source: PubMed Central journal article supplement — BMJ Open. 2021 Dec 15;11(12):e050804. doi: 10.1136/bmjopen-2021-050804 (PMC8679133; doi:10.1136/bmjopen-2021-050804), 2021-12-15
Supplement: bmjopen-2021-050804.draft_revisions.pdf [file bmjopen-2021-050804.draft_revisions.pdf]

# BMJ Open

BMJ Open is committed to open peer review. As part of this commitment we make the peer review history of every article we publish publicly available.

When an article is published we post the peer reviewers' comments and the authors' responses online. We also post the versions of the paper that were used during peer review. These are the versions that the peer review comments apply to.

The versions of the paper that follow are the versions that were submitted during the peer review process. They are not the versions of record or the final published versions. They should not be cited or distributed as the published version of this manuscript.

BMJ Open is an open access journal and the full, final, typeset and author-corrected version of record of the manuscript is available on our site with no access controls, subscription charges or pay-per-view fees (<http://bmjopen.bmj.com>).

If you have any questions on BMJ Open's open peer review process please email [info.bmjopen@bmj.com](mailto:info.bmjopen@bmj.com)

# BMJ Open

**Patient-reported outcome measures for knowledge transfer and behavior modification interventions in type 2 diabetes. The INDICA study: a multi-arm cluster randomized controlled trial**

|                               |                                                                                                                                                                                                                                                                                                                                                                                                                                                                                                                                                                                                                                                                                                                                                                                                                                                                                                                                                                                                                                                                                                                                                                                                                                                                                                                                                                                                                                                                                                                                                                                                                                                                                                                                                                        |
|-------------------------------|------------------------------------------------------------------------------------------------------------------------------------------------------------------------------------------------------------------------------------------------------------------------------------------------------------------------------------------------------------------------------------------------------------------------------------------------------------------------------------------------------------------------------------------------------------------------------------------------------------------------------------------------------------------------------------------------------------------------------------------------------------------------------------------------------------------------------------------------------------------------------------------------------------------------------------------------------------------------------------------------------------------------------------------------------------------------------------------------------------------------------------------------------------------------------------------------------------------------------------------------------------------------------------------------------------------------------------------------------------------------------------------------------------------------------------------------------------------------------------------------------------------------------------------------------------------------------------------------------------------------------------------------------------------------------------------------------------------------------------------------------------------------|
| Journal:                      | <i>BMJ Open</i>                                                                                                                                                                                                                                                                                                                                                                                                                                                                                                                                                                                                                                                                                                                                                                                                                                                                                                                                                                                                                                                                                                                                                                                                                                                                                                                                                                                                                                                                                                                                                                                                                                                                                                                                                        |
| Manuscript ID                 | bmjopen-2021-050804                                                                                                                                                                                                                                                                                                                                                                                                                                                                                                                                                                                                                                                                                                                                                                                                                                                                                                                                                                                                                                                                                                                                                                                                                                                                                                                                                                                                                                                                                                                                                                                                                                                                                                                                                    |
| Article Type:                 | Original research                                                                                                                                                                                                                                                                                                                                                                                                                                                                                                                                                                                                                                                                                                                                                                                                                                                                                                                                                                                                                                                                                                                                                                                                                                                                                                                                                                                                                                                                                                                                                                                                                                                                                                                                                      |
| Date Submitted by the Author: | 09-Mar-2021                                                                                                                                                                                                                                                                                                                                                                                                                                                                                                                                                                                                                                                                                                                                                                                                                                                                                                                                                                                                                                                                                                                                                                                                                                                                                                                                                                                                                                                                                                                                                                                                                                                                                                                                                            |
| Complete List of Authors:     | <p>Ramallo-Fariña , Yolanda; Fundación Canaria de Investigación y Salud; Red de Investigación en Servicios de Salud en Enfermedades Crónicas, Rivero-Santana, Amado ; Fundación Canaria de Investigación y Salud; Red de Investigación en Servicios de Salud en Enfermedades Crónicas García-Pérez, Lidia; Fundación Canaria de Investigación y Salud; Red de Investigación en Servicios de Salud en Enfermedades Crónicas García-Bello, Miguel Angel; Fundación Canaria de Investigación y Salud Wägner, Ana Maria; Insular University Hospital of Gran Canaria, Department of Endocrinology and Nutrition; University of Las Palmas de Gran Canaria, University Institute for Biomedical and Health Research (IUIBS)</p> <p>Gonzalez-Pacheco, Himar; Fundación Canaria de Investigación y Salud Rodríguez-Rodríguez, Leticia; Fundación Canaria de Investigación y Salud</p> <p>Kaiser-Girardot , Sybille; Servicio de Evaluacion y Planificacion del Servicio Canario de la Salud</p> <p>Monzón-Monzón, Guillermo; Servicio de Evaluacion y Planificacion del Servicio Canario de la Salud</p> <p>Guerra-Marrero, Carolina; Servicio de Evaluacion y Planificacion del Servicio Canario de la Salud</p> <p>Daranas-Aguilar, Carmen; Servicio de Evaluacion y Planificacion del Servicio Canario de la Salud</p> <p>Roldán-Ruano, Margarita; Servicio de Evaluacion y Planificacion del Servicio Canario de la Salud</p> <p>Carmona, Montserrat; Instituto de Salud Carlos III, Health Technology Assessment Agency; Red de Investigación en Servicios de Salud en Enfermedades Crónicas</p> <p>Serrano-Aguilar, Pedro; Red de Investigación en Servicios de Salud en Enfermedades Crónicas; Red de Investigación en Servicios de Salud en Enfermedades Crónicas</p> |
| Keywords:                     | PRIMARY CARE, DIABETES & ENDOCRINOLOGY, Quality in health care < HEALTH SERVICES ADMINISTRATION & MANAGEMENT, Health informatics < BIOTECHNOLOGY & BIOINFORMATICS                                                                                                                                                                                                                                                                                                                                                                                                                                                                                                                                                                                                                                                                                                                                                                                                                                                                                                                                                                                                                                                                                                                                                                                                                                                                                                                                                                                                                                                                                                                                                                                                      |
|                               |                                                                                                                                                                                                                                                                                                                                                                                                                                                                                                                                                                                                                                                                                                                                                                                                                                                                                                                                                                                                                                                                                                                                                                                                                                                                                                                                                                                                                                                                                                                                                                                                                                                                                                                                                                        |

1  
2  
3  
4  
5  
6  
7  
8  
9  
10  
11  
12  
13  
14  
15  
16  
17  
18  
19  
20  
21  
22  
23  
24  
25  
26  
27  
28  
29  
30  
31  
32  
33  
34  
35  
36  
37  
38  
39  
40  
41  
42  
43  
44  
45  
46  
47  
48  
49  
50  
51  
52  
53  
54  
55  
56  
57  
58  
59  
60

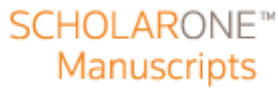

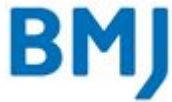

I, the Submitting Author has the right to grant and does grant on behalf of all authors of the Work (as defined in the below author licence), an exclusive licence and/or a non-exclusive licence for contributions from authors who are: i) UK Crown employees; ii) where BMJ has agreed a CC-BY licence shall apply, and/or iii) in accordance with the terms applicable for US Federal Government officers or employees acting as part of their official duties; on a worldwide, perpetual, irrevocable, royalty-free basis to BMJ Publishing Group Ltd ("BMJ") its licensees and where the relevant Journal is co-owned by BMJ to the co-owners of the Journal, to publish the Work in this journal and any other BMJ products and to exploit all rights, as set out in our [licence](#).

The Submitting Author accepts and understands that any supply made under these terms is made by BMJ to the Submitting Author unless you are acting as an employee on behalf of your employer or a postgraduate student of an affiliated institution which is paying any applicable article publishing charge ("APC") for Open Access articles. Where the Submitting Author wishes to make the Work available on an Open Access basis (and intends to pay the relevant APC), the terms of reuse of such Open Access shall be governed by a Creative Commons licence – details of these licences and which [Creative Commons](#) licence will apply to this Work are set out in our licence referred to above.

Other than as permitted in any relevant BMJ Author's Self Archiving Policies, I confirm this Work has not been accepted for publication elsewhere, is not being considered for publication elsewhere and does not duplicate material already published. I confirm all authors consent to publication of this Work and authorise the granting of this licence.

**TITLE PAGE****Patient-reported outcome measures for knowledge transfer and behavior modification interventions in type 2 diabetes. The INDICA study: a multi-arm cluster randomized controlled trial****Authors**

Ramallo-Fariña Y<sup>1,2</sup>, Rivero-Santana A<sup>1,2</sup>, García-Pérez L<sup>1,2</sup>, García-Bello MA<sup>1</sup>, Wägner AM<sup>3,4</sup>, González-Pacheco H<sup>1</sup>, Rodríguez-Rodríguez L<sup>1</sup>, Kaiser-Girardot S<sup>5</sup>, Monzón G<sup>5</sup>, Guerra Marrero C<sup>5</sup>, Daranas-Aguilar C<sup>5</sup>, Roldán-Ruano M<sup>5</sup>, Carmona M<sup>2,6</sup>, Serrano-Aguilar P<sup>2,5</sup>, INDICA Team

1 Canary Islands Health Research Institute Foundation (FIISC), Tenerife, Spain

2 Research Network on Health Services in Chronic Diseases (REDISSEC), Madrid, Spain

3 Department of Endocrinology and Nutrition, Insular University Hospital, Las Palmas de Gran Canaria, Spain

4 University Institute for Biomedical and Health Research (UIBS), University of Las Palmas de Gran Canaria (ULPG), Las Palmas de Gran Canaria, Spain

5 Evaluation Unit (SESCS), Canary Islands Health Service (SCS), Tenerife, Spain

6 Health Technology Assessment Agency, Instituto de Salud Carlos III, Madrid, Spain

**Corresponding author**

Yolanda Ramallo Fariña, ([yramfar@sescs.es](mailto:yramfar@sescs.es))

Camino Candelaria, 44. C.S. San Isidro-El Chorrillo  
38109 El Rosario. Tenerife. Spain

**Word count:** 4.129

## ABSTRACT

### Objective

This study assesses the effectiveness, from the patients' perspective, of different interventions of knowledge transfer and behavior modification to improve type 2 diabetes mellitus (T2DM) outcomes in the long-term (24 months).

### Methods

The INDICA study is an open, community-based pragmatic, multicenter, controlled trial with random allocation by clusters to usual care (UC) or two different interventions and their combination. The intervention for patients (PTI) included an educational group program, logs and a web-based platform for monitoring, and automated SMS. The intervention for professionals (PFI) included an educational program, a decision support tool embedded into the electronic clinical record, and periodic feedback about patients' results. A third group received a combined intervention (CBI). A total of 2,334 uncomplicated T2DM patients and 211 healthcare professionals were included of 32 Primary Care Centers in Canary Islands (Spain). The measurements included were cognitive-attitudinal, behavioral, affective and health related quality of life dimensions. Mixed models were performed.

### Results

Compared to UC, the PTI group significantly improved knowledge and adherence to dietary recommendations. Significant improvements were also observed in quality of life, empowerment and distress. The PFI group improved in depression, anxiety self-empowerment and distress. The CBI group improved in knowledge, self-empowerment, and adherence to dietary recommendations. Significant improvements were also observed in the proportion of patients who quit smoking for PTI and CBI (41.2% in PTI and 42.2% in CBI vs. 21.4% in UC group).

### Conclusions

Assessed interventions to improve patient reported outcomes measures (PROMS) in T2DM attain effectiveness for knowledge, empowerment, distress, diet adherence and tobacco cessation. PTI produced the most lasting benefits.

**Trial Registration:** ClinicalTrials.gov NCT01657227 (August 6, 2012)  
<https://clinicaltrials.gov/ct2/show/NCT01657227>

**Keywords:** Primary Care, Diabetes & Endocrinology, Quality in health Care, Health Informatics

### **Strengths and Limitation of this study**

- The INDICA study provides randomized evidence on the effectiveness of complex interventions to improve outcomes in type 2 diabetes mellitus patients, with a longer follow up than previous studies.
- All relevant stakeholders in the community are involved in the INDICA study (patients and family caregivers and primary care professionals).
- The trial included a large sample of patients with type 2 diabetes regardless of their baseline HbA1c level, reinforcing the external validity of the results.
- The INDICA interventions with ICT-based components favor applicability and access, in a cost-effective manner, to a growing number of patients.
- A limitation in the use of PROMS is the absence of well-established empirically derived minimum clinically significant differences

## INTRODUCTION

Many type 2 diabetes mellitus (T2DM) patients do not achieve the recommended treatment goals for glycaemic control[1]. This might be due to inappropriate health care access and/or clinical management. However, research has also shown the role of health literacy and knowledge to empower patients[2]. Moreover, psychological and emotional aspects, such as diabetes distress, are also important issues for glycaemic control[3].

A systematic review by Chen et al[4] states that interventions that aim to empower people with chronic illnesses are able to improve health status, outcome indicators of psychological and social aspects, and self-management. Patient-reported outcome measures (PROMs) are standardized, validated questionnaires completed by patients to mirror their perception of their health status, perceived level of impairment, disability and health-related quality of life[5]. Previous research has shown the value of PROMs to monitor these outcome measures in diabetes[6], which contribute to patient empowerment and patient-centered care[7].

The INDICA study is a pragmatic, cluster-randomized controlled trial with two years follow-up that assesses the effectiveness and cost-effectiveness of multicomponent interventions for knowledge transfer and behavior modification of patients, families, and healthcare professionals (physicians and nurses) in a large number of Primary Care Health Practices (PHCP). These interventions combine conventional group educational and training activities with different ICT-based interventions to guide the decisions of the main actors involved in the management of T2DM[8]. Descriptive information on the patients' use of the different components of the intervention and the comparative clinical effectiveness among interventions can be seen in Ramallo-Fariña et al[9]. Their cost-effectiveness evaluation can be reviewed in García-Pérez et al[10].

The main objective of the INDICA study was to assess the effectiveness (HbA1c) and cost-effectiveness of different decision support interventions to modify the lifestyles of T2DM patients and improve their health outcomes[9,10]. This study examines the effect of a set of intertwined PROMs on cognitive-attitudinal (knowledge, empowerment), behavioral (i.e., adherence to the dietary recommendation, medication and tobacco use), affective (anxiety, depression, distress) and health related quality of life dimensions. These outcomes are commonly targeted for most diabetes interventions because of their



1  
2  
3  
4  
5  
6  
7  
8  
9  
10  
11  
12  
13  
14  
15  
16  
17  
18  
19  
20  
21  
22  
23  
24  
25  
26  
27  
28  
29  
30  
31  
32  
33  
34  
35  
36  
37  
38  
39  
40  
41  
42  
43  
44  
45  
46  
47  
48  
49  
50  
51  
52  
53  
54  
55  
56  
57  
58  
59  
60

association with critical, longer-term outcomes, such as functional capacity[11], complications[12-14], mortality[15], health care costs[16], and quality of life[17].

For peer review only

## METHODS

### Trial design

The INDICA study is an open, community-based pragmatic, multicenter, controlled trial with random allocation by clusters to usual care or one of three multicomponent interventions of knowledge transfer and behavior modification. One intervention was aimed at patient and family members (PTI); another intervention was aimed at primary care healthcare professionals (physicians and nurses) (PFI) and the third intervention combined the other two (CBI). In the control group, both patients/families and physicians/nurses received the usual activities provided by the PHCP. The full study protocol has been published before[8].

### Study Participants

The INDICA study included adults aged 18 to 65 years who had been diagnosed with T2DM at least one year before, did not have any diabetes-related complications, and used a mobile phone regularly[8]. Family Care Units (FCU) in each PCHP, comprised of a family physician and a nurse, were the recruitment unit. All PHCPs included had to have at least eight FCUs and the availability of appropriate facilities to provide educational group sessions. FCUs planning or awaiting placement changes among PHCP in the first six months after the project began were excluded.

### Setting and recruitment

PHCPs were randomly selected in the islands of Tenerife, Gran Canaria, Lanzarote, and La Palma (Canary Islands, Spain). Moreover, FCUs were randomly selected from all consenting FCUs at each PHCP. The electronic clinical records (ECR) of all potentially eligible patients in selected FCUs were screened to verify inclusion and exclusion criteria.

### Patient and public involvement

Patients were actively involved in the design of the trial. Two associations of patients with T2DM in the Canary Island were included from the beginning of the study as part of the research team, with an active participation in the design of the interventions and selection of the outcomes measured. In the same way, primary care professionals and clinical management staff participated in the elaboration of the protocol. The patients and

professionals included in the study could express their satisfaction with the interventions through a questionnaire, as well as through focus groups and in-depth interviews that will be the objective of another publication. Finally, we established a commitment with patients and healthcare professionals to share the results with them in an easy-to-understand way.

### **Random assignment**

Randomization was applied at different levels. First, three different strata were created according to the geographic areas in the more populated islands (Tenerife and Gran Canaria). Second, four PHCP (clusters) were randomly allocated to every geographic stratum and block permutation was used to assign PHCPs to the study arms; the PHCP being the sampling unit. La Palma and Lanzarote (less populated islands) were geographically divided into four zones with only one eligible PHCP available in each zone randomly assigned to one of the study arms. In every island, all arms were equally distributed. Six FCUs were randomly selected, from all those consenting to participate in each PHCP. From all patients fulfilling inclusion criteria and consenting to participate in each PHCP, 15 were randomly selected per FCU. Exceptionally, more than six FCUs or more than 15 patients per FCU were selected, to guarantee recruitment of 90 patients in every PHCP. FCU and patient randomization were performed by simple generation from a list of random numbers.

### **Interventions**

#### *Patient interventions*

Patients recruited to the PTI and CBI groups received a complex intervention of knowledge transfer and behavior modification, informed by conceptual frameworks of behavioral change[12]. The intervention combined: A) an eight-session, conventional, group educational program given by a nurse specialized in diabetes; B) monitoring of physical activity, diet, drug adherence, mood, blood pressure, and blood glucose readings by daily use of paper workbooks, complemented by weekly access to a website platform to upload paper workbook data; and C) continuous, personalized feedback by semi-automated mobile phone messages (SMS), modified according to the website information.

### *Interventions for primary care professionals*

Primary care professionals recruited to the PFI and CBI groups received a complex intervention of knowledge transfer and decision support, informed by the determinants of behavior change suggested by Michie et al[18] for its design and implementation. The intervention included: A) an educational and interactive group program of two sessions to update clinical management information and promote patient-centered care; B) an automated decision aid tool, based on a CPG for T2DM embedded into the electronic clinical record; and C) monthly computerized graphic feedback, which displayed a set of processes and outcome indicators for all T2DM patients of the corresponding FCU compared to other FCU in their setting and the FCU with the best results. Both interventions were applied during the two years follow-up.

### **Duration of fieldwork**

Fieldwork took place between February 2013 and October 2016. The first year and the following two years were devoted to recruitment of patients and healthcare providers, and intervention and follow-up, respectively. As interventions were maintained over time, intervention and follow-up periods overlapped.

### **Outcomes**

#### *Cognitive-attitudinal outcomes*

To assess potential changes in patient knowledge about T2DM and its self-management, we developed a specific instrument created in the context of this project, named DIATEK, which consisted of 30 questions. Each item has four response options and only one correct answer. Items examined risk factors for disease development and deterioration, objective values for biochemical parameters; recommendations on nutrition, physical activity, drug use and self-management. The total score, obtained by adding all correct responses, and ranging from 0 to 30, was later rescaled from 0 to 10.

The Diabetes Empowerment Scale-Short Form (DES-SF)[19] is a validated questionnaire designed to evaluate psychosocial self-efficacy in diabetes. DES-SF is the short form of the original DES, which includes eight items (need for change, developing a plan, overcoming barriers, asking for support, supporting oneself, coping with emotion,

1  
2  
3 motivating oneself, and making diabetes care choices appropriate for one's priorities and  
4 circumstances) with responses on a five-point Likert scale and an overall range from eight  
5 to 40, according to increasing patient empowerment.  
6  
7

### 8 9 *Behavioral outcomes*

10  
11  
12 The Mediterranean Diet Adherence Screener (MEDAS)[20] is a validated questionnaire  
13 to assess dietary recommendation adherence, which consists of 14 targets for food  
14 consumption, rated with one point for each target attained. According to the final score,  
15 patients are classified as having low (0-6 points), moderate (7-10) or high adherence (11-  
16 14 points) to the Mediterranean diet.  
17  
18

19  
20  
21 The Morisky Medication Adherence Scale (MGLS)[21] assesses drug-treatment  
22 adherence, by means of a validated four-item self-report instrument and a final score  
23 ranging from 0 to 4. Patients are considered adherent, only if they obtain four points.  
24  
25

26  
27 Smoking status was monitored from baseline and during follow-up, to check for potential  
28 cessation throughout the study.  
29

### 30 31 *Affective outcomes*

32  
33  
34 The State Trait Anxiety Inventory (STAI-S)[22] is a validated patient-reporting  
35 questionnaire that includes two non-dependent scales; the applied state-anxiety scale  
36 (STAI State) and the trait-anxiety scale (STAI Trait). It assesses transient emotional state  
37 or condition as characterized by subjective feelings of tension and apprehension that can  
38 fluctuate in time and intensity. The STAI-S includes 20 items, with each item scored on  
39 a four-point Likert scale. Anxiety is defined by a cut-off point  $\geq 30$ .  
40  
41  
42

43  
44  
45 The Beck Depression Inventory II (BDI-II)[23] consists of 21 items scored on a four-  
46 point scale from 0 ("not at all") to 3 ("most of the time"). The items assess depression  
47 symptoms in the last two weeks. All item scores are added to a maximum score of 63. A  
48 BDI-II score of  $\geq 14$  indicates mild depressive symptoms.  
49  
50

51  
52  
53 The Diabetes Distress Scale (DDS2)[24] is a validated two-item diabetes distress-  
54 screening instrument that asks respondents to rate, on a six-point scale, the degree of  
55 distress caused by the two following items: (1) feeling overwhelmed by the demands of  
56 living with diabetes and (2) feeling that I am often failing with my diabetes regimen. High  
57  
58  
59  
60

1  
2  
3 Diabetes distress can be identified by an average score  $\geq 3$  or more, low distress by scores  
4 under two, and moderate distress by the scores in between.  
5  
6

### 7 *Health- related quality of life and symptoms*

8  
9

10 The Audit of Diabetes-Dependent Quality of life (ADDQoL-19)[25] is a specific HRQoL  
11 questionnaire for diabetes. It assesses 19 domains, each with its impact and importance  
12 index to provide an integrated score for each domain. The sum of the score in each domain  
13 forms the global score (range: -9 to 3). The lower the score, the worse the quality of life.  
14  
15

16 The Michigan Neuropathy Screening Instrument (MNSI)[26] is an instrument that  
17 measures the incidence of distal diabetic peripheral polyneuropathy. It is composed of 15  
18 self-administered items, in which the abnormal responses are added. A score of seven or  
19 more is considered abnormal.  
20  
21  
22  
23  
24

### 25 *Satisfaction*

26 An ad-hoc self-completed questionnaire was developed to measure satisfaction with each  
27 component of the interventions in PTI and CBI groups. It was measured in the 24-month  
28 follow-up in patients who, having attended the group educational program, also used the  
29 web platform or received the semi-automated mobile phone messages. Satisfaction with  
30 each component was valued from 0 to 10 points, with 10 reflecting maximum satisfaction.  
31  
32  
33  
34

35 All information, including demographic data, overall and personal health history, diabetes  
36 health status, current medications, smoking status, and risk factors for complications, was  
37 obtained in a face to face interview at baseline and at 3, 6, 12, 18 and 24 months of follow-  
38 up. Similarly, all self-administered questionnaires (ADDQoL-19, BDI-II, DES-SF,  
39 DDS2, DIATEK, MEDAS, STAI-S, MGLS and MNSI), were distributed and collected  
40 at baseline, and at 12 and 24 months follow-up. ADDQoL-19, MEDAS and MGLS were  
41 also applied at 6 and 18 months.  
42  
43  
44  
45  
46  
47

### 48 **Statistical Analysis**

49  
50

51 Multilevel mixed models including the baseline value of dependent variables and time  
52 elapsed since diagnosis (in years) as covariates were implemented for all PROMs. First  
53 level variables are those corresponding to each measurement along follow-up (repeated  
54 time measurements). The second level includes patient variables and third level variables  
55 correspond to PHCP. The effect that identifies the intervention arm has been considered  
56  
57  
58  
59  
60

1  
2  
3 fixed for the different PHCP, whilst the intercept has been considered random. The model  
4 also included an interaction term between arm and month, which allows for differences  
5 in the intervention effect between follow-up assessments[27]. The adjusted estimated  
6 mean was calculated for each follow up moment compared to baseline; and its statistical  
7 significance was calculated by means of the model already set out. The relative  
8 improvement for each follow-up was obtained as the ratio between the adjusted difference  
9 in mean between the intervention and control group and the mean of the control group. A  
10 logistic regression model was implemented to compare the proportion of patients who  
11 quit smoking at each follow-up, by intervention arm. The *P*-values of the multiple  
12 comparisons were corrected by Bonferroni.

13  
14  
15 To accommodate missing values in the effect analyses, the multiple imputation procedure  
16 was employed[28], with results based on 100 imputed datasets. This procedure saves  
17 cases for analysis and can be considered an intention-to-treat analysis. Analysis under  
18 multiple imputation is valid for randomly missed data[29]. All the analyses were  
19 conducted using STATA version 15.0.[30]. Differences were considered statistically  
20 significant if  $P < 0.05$ .

### 21 22 23 **Ethical approval and consent to participate**

24  
25 All participants provided written informed consent. The scientific and ethics committees  
26 of both the University Hospital of Canarias (ID: 2012\_44) and the University Hospital  
27 Nuestra Señora de la Candelaria (ID: EPA-07/10) approved the study protocol. The study  
28 was performed in accordance with Good Clinical Practice standards, prevailing local  
29 regulatory requirements, and Declaration of Helsinki recommendations.

## RESULTS

### Study Participants

A total of 2334 patients and 211 healthcare professionals were included. Figure 1 shows the flowchart with cluster randomization of patients for each intervention, attendance at educational/training sessions of patients and professionals and the number of PROMs questionnaires received for each follow-up assessment. The patients' baseline characteristic according to the intervention assignment can be seen in Ramallo-Fariña et al[9]. Mean age of the whole population was  $55.7 \pm 7.1$  years, with 51.9% women. Mean baseline HbA1c was 7.3%/56 mmol/mol. From baseline, 49.4% of patients started with HbA1c levels within the accepted therapeutic goal ( $\leq 7\%/53$  mmol/mol). There were no statistically significant differences among groups in terms of their baseline characteristics.

### *Cognitive-attitudinal outcomes*

Table 1 shows that the level of knowledge about diabetes is significantly higher for PTI ( $P=0.007$ ) and CBI ( $P=0.008$ ), compared with UC, at 12 months; and for PTI ( $P=0.005$ ) at 24 months.

Patient empowerment was significantly higher for PFI and CBI groups, compared to UC at 12 months ( $P<0.001$  for both comparisons). At 24 months, PTI and CBI also attained significantly higher scores than UC ( $P=0.002$  and  $P=0.008$ , respectively); while differences with PFI are marginally significant.

### *Behavioral outcomes*

Table 1 shows that the PTI group is significantly more adherent to the diet recommendations, compared to UC, after 12 months of follow-up. There is a difference of 0.87 ( $P<0.001$ ) at 24 months. Adherence improves for CBI from 18 months, compared to UC, with differences of 0.7 ( $P=0.004$ ) at 24 months. Adherence levels remain moderate for all patient groups throughout follow-up (see Table 2).

No differences were found in medication adherence, compared to UC (Table 1). However, average levels of medication adherence were significantly improved in all four groups, despite the high baseline levels ( $>3$ ) (see Table 2).



1  
2  
3 Table 3 shows the reduction in the proportion of smokers who quit smoking during follow  
4 up in PTI (12 months), and CBI (18 months), compared to UC. The percentage of patients  
5 who quit smoking at 24 months was 41.2% for PTI ( $P=0.01$ ) and 42.2% ( $P=0.01$ ) for  
6 CBI, versus 21.4% for UC group. There were no statistically significant differences  
7  
8 between groups in the baseline percentage of smokers ( $P=0.99$ ).  
9

#### 12 *Affective outcomes*

13 Compared to UC, both PFI and CBI show statistically significant differences at 12 months  
14 for depression ( $P=0.003$  and  $P=0.006$ , respectively), and anxiety ( $P=0.05$  and  $P=0.003$ ,  
15 respectively) (Table 1). These differences disappear at 24 months because all groups of  
16 patients improved (Table 2).  
17  
18

19  
20  
21 The diabetes distress score improved significantly compared to the UC group for CBI at  
22 12 months ( $P=0.01$ ) and for PTI and PFI at 24 months ( $P=0.01$  and  $P=0.03$ , respectively).  
23 The score remained marginally significant for CBI (Table 1). At baseline, all patient  
24 groups showed moderate distress, which decreased to a low level from 12 months, except  
25 for the UC group, which did so at 24 months (Table 2).  
26  
27  
28

#### 29 *Health-related quality of life and symptoms*

30 HRQoL significantly improved for all intervention groups, at 12 months, compared to  
31 UC; a difference only maintained for PTI at 18 months ( $P=0.02$ ) (Table 1).  
32  
33

34  
35  
36 Neuropathic symptom scores were significantly lower for the CBI group at 12 months  
37 ( $P=0.02$ ) compared to the UC group. This difference disappeared at 24 months (Table 1).  
38 Mean baseline scores for all groups were under 4, considerably below the cut-off point of  
39 7 for abnormal classification (Table 2).  
40  
41  
42

#### 43 *Satisfaction*

44 Table 4 shows the patients' satisfaction with the intervention received. While average  
45 scores were higher than 9/10, in all dimensions, for the group educational sessions,  
46 satisfaction with the web platform and SMS obtained scores above 8.  
47  
48  
49  
50  
51  
52  
53  
54  
55  
56  
57  
58  
59  
60

## DISCUSSION

This article assesses the effect of interventions implemented by the INDICA study to improve T2DM outcomes on several health measures self-perceived by patients in the cognitive-attitudinal (knowledge, empowerment), behavioral (i.e., adherence to the dietary recommendations, medication and tobacco use), affective (anxiety, depression, distress) and health-related quality of life dimensions. The INDICA study is a pragmatic cluster-randomized study with two years follow up that assesses the effectiveness of multicomponent interventions for knowledge transfer and behavior modification of patients, families, and healthcare professionals (physicians and nurses) at the primary care level.

This study shows that one year after the start of follow-up, the CBI obtained significant improvements compared to UC in all variables except behavioral. The relative improvements observed ranged between 9.6% (knowledge) and 52.2% (HRQoL), with intermediate values for anxiety (26.1%) and depression (28.7%). The PTI and PFI also obtained significant improvements in HRQoL, although of less intensity (24.8% and 31.7%, respectively). There was divergence with the rest of the significant findings: the PTI group improved in knowledge, adherence to dietary recommendations and smoking cessation; while the PFI improved in depression and empowerment; but a significantly worse result than the UC group for diet adherence. After two years follow-up, there were no significant differences among groups in terms of HRQoL, anxiety or depression, mainly due to the improvement experienced by the UC group. The PTI group obtained the best global results, with significant improvements in terms of knowledge, distress, empowerment, adherence to diet and tobacco cessation. For these last three variables, the CBI was also significantly better than UC, while PFI exceeded the UC group only for distress measures. A significantly worse result in knowledge was obtained. There were no differences in medication adherence, although a ceiling effect could have occurred, since all groups showed high scores at baseline. Overall, the best results were observed in both groups including patients (PTI and CBI), similar to previous clinical outcomes. This is not surprising, given the straightforward and continuous application of these patient interventions, and the high reported satisfaction levels with all intervention components (educational sessions, web resources and SMS). Previous studies that combined education and training with support phone calls, assessing interventions aimed

1  
2  
3 at empowering diabetes patients to improve self-care and outcomes, showed inconsistent  
4 results between clinical variables and PROMS[31,32]. The use of one-way messages such  
5 as those used in INDICA, appears to improve HbA1c levels modestly but significantly  
6 and consistently[33]. In addition, continuous advances in smart mobile technology  
7 provide new possibilities for diabetes self-management, despite the fact that evidence on  
8 the effectiveness of these new functionalities remains scarce and uncertain[34,35].  
9

10  
11  
12  
13  
14 Reduction in the number of smokers in interventions applied directly to patients (PTI and  
15 CBI) in regard to UC that remain significant at 24 months with percentages of  
16 approximately 42% which is 2.5 times the result obtained by the most extended  
17 pharmacologic intervention (replacement nicotine therapy). This is according to a meta-  
18 analysis published recently[36] which puts this reduction at 16.9% of the intervened  
19 group compared to 10.4% of the control group in studies with follow up varying from six  
20 to 24 months.  
21  
22  
23  
24  
25

26  
27 The intervention effect on professionals raises questions. At one year of follow-up, the  
28 PFI and CBI groups obtained improvements in psychological variables not affected by  
29 the intervention targeted exclusively at patients (PTI) (i.e., empowerment, anxiety,  
30 depression). These findings could be interpreted as the lasting result of better shared  
31 decision-making/patient-centered care by professionals trained in this care model.  
32 However, the PTI group was the only group to show significant improvements in  
33 behavioral variables (diet adherence and tobacco consumption); while PFI obtained  
34 significantly worse results for diet adherence from month six, and CBI did not show  
35 significant benefits, for these two outcomes, until 18 months. These negative findings  
36 from groups containing professionals are repeated after two years in the case of  
37 knowledge, a variable in which the CBI group did not obtain significant differences. This  
38 interpretation should be considered cautiously given the analysis limitations, since the  
39 differences between intervention groups have not been statistically contrasted. As a recent  
40 Cochrane review[37] reported, current evidence on the effect of interventions to promote  
41 shared decision making by healthcare professionals shows benefits when decision making  
42 is assessed by external observers but not by patient's assessment; furthermore, no  
43 significant effects were observed in most patient-reported outcomes[37]. Given the  
44 paucity and limited quality of available studies, more focused research is needed to draw  
45 solid conclusions about the effect of interventions aimed at professionals, and the  
46  
47  
48  
49  
50  
51  
52  
53  
54  
55  
56  
57  
58  
59  
60

1  
2  
3 mechanisms by which these interventions translate into psychological, behavioral and  
4 health changes of patients.

5  
6 The assessment of clinical outcome measures in the INDICA study [9] for the total sample  
7 recruited regardless of Hb1Ac levels (only 50.6% of all participants had baseline HbA1c  
8 concentrations >7%, with a mean of 7.3%), showed an early and significant but temporary  
9 reduction in HbA1c for the PTI group, compared to UC, from 3 to 6 months. Even so,  
10 more than 30% of the intervened patients (PTI and CBI) attained statistically and  
11 clinically relevant reductions in HbA1c (> 0.4%); significantly higher than UC at 12 and  
12 18 months.

13  
14 In the group of patients with baseline HbA1c greater than 7% (uncontrolled patients), the  
15 magnitude of the intervention effect on clinical outcomes was greater, especially in the  
16 PTI group compared to the UC group, with significant differences up to 18 months, and  
17 a significant area under the curve at 24 months for PTI compared to UC[9]. These results  
18 are supported by other studies that report greater intervention effects in patients with  
19 higher HbA1c levels[38,39]. Longer-term reductions in blood pressure were also found  
20 in the two groups in which professionals were intervened, with smaller effects in the  
21 remaining clinical measures (lipid profile, body mass index, serum creatinine and  
22 glomerular filtration rate). Some of these results are more related to changes in medication  
23 than lifestyles. From a cost-effectiveness perspective, small differences were observed  
24 between groups after two years follow up. The PTI was more effective and less costly  
25 than CBI and PFI, in patients with HbA1c>7%[10]. This prompted the conclusion that  
26 interventions focused on patients with the highest needs would limit the impact on the  
27 health care sector budget.

28  
29 This study has several limitations. The high number of instruments and measurement  
30 times increase the risk of type 1 error, which explains the decision not to compare  
31 intervention groups with each other. Moreover, the use of PROMs makes it necessary to  
32 know the minimum clinically significant differences of every instrument used. This  
33 difference, however, has not been investigated for most of them, and there is currently no  
34 consensus on the appropriate method (distribution or anchor-based) and/or statistics (e.g.,  
35 absolute versus relative reduction)[40]. Furthermore, the use of PROMs implies by  
36 definition an unblind assessment of results, which is added to the impossibility of blinding  
37 the participants regarding the intervention. Despite these limitations, the INDICA study  
38 presents some distinctive characteristics from other published studies that assess the  
39 impact of interventions promoting empowerment, self-management and behavior  
40  
41  
42  
43  
44  
45  
46  
47  
48  
49  
50  
51  
52  
53  
54  
55  
56  
57  
58  
59  
60

1  
2  
3 modification to patients and professionals: 1) a robust design (pragmatic cluster-  
4 randomized controlled trial with a factorial design for intervention arms) with a long  
5 follow-up (two years); 2) incorporation of the different actors involved in disease  
6 management (patients and family caregivers and primary care professionals; 3) greater  
7 external validity by including patients regardless of their baseline HbA1c levels; 4)  
8 incorporation of ICT-based components to the intervention that favors applicability and  
9 access, in a cost-effective manner, to a growing number of patients; and 5) inclusion of a  
10 large sample size with 2334 patients and 211 healthcare professionals.  
11  
12

13  
14  
15  
16  
17 In conclusion, all the interventions assessed improved patients HRQoL at one year of  
18 follow-up, with differences according to the intervention in the remaining PROMs  
19 examined. The intervention targeted exclusively at patients (PTI) significantly improved  
20 knowledge, empowerment, distress, dietary recommendation adherence and tobacco  
21 cessation, up to two years of follow-up. Although the clinical relevance of these effects  
22 is uncertain, except in the case of smoking cessation, these results are promising since  
23 they reflect improvements in all personal domains assessed (cognitive, attitudinal,  
24 affective, behavioral), which highlight the importance of behavioral factors to attain good  
25 health outcomes. The intervention on professionals improved affective variables at one  
26 year of follow-up, but showed virtually no effects at two years together with a negative  
27 effect on diet adherence and no effect on tobacco consumption, which emphasizes the  
28 need for more focused evaluative research on this type of intervention. For both target  
29 groups (patients and professionals), the use of ICT can be a major help to improve care  
30 access and continuity; as well as effectiveness and cost-effectiveness in T2DM self-  
31 management.  
32  
33  
34  
35  
36  
37  
38  
39  
40  
41  
42  
43

## 44 STATEMENTS

### 47 Acknowledgements

48  
49 We thank Prof Clare Bradley and Health Psychology Research Limited (owners and  
50 source of the ADDQoL-19 questionnaire) for allowing the use of their questionnaire in  
51 the INDICA Study. We also thank Jason Willis-Lee for copyediting services during  
52 preparation of the final manuscript, and Thayli León Plasencia for her help in recruiting  
53 patients.  
54  
55  
56  
57  
58  
59  
60

### **Conflicts of interest/Competing interests**

The authors declare that they have no competing interest.

### **Competing interests**

The authors declare that they have no competing interest.

### **Availability of data and material**

The datasets generated during and/or analysed during the current study are available from the corresponding author on reasonable request.

### **Funding**

This work was supported by the Spanish Ministry of Economy, Industry and Competitiveness (Instituto de Salud Carlos III), grant number: ADE10/00032 and PI16/00769 cofounded by Fondo Europeo de Desarrollo Regional (FEDER) “Una manera de hacer Europa”. The funders did not participate in the study design; collection, management, analysis, and interpretation of data; writing of the report; and the decision to submit the report for publication.

### **Author Contributions**

YRF, LGP, LRR, AMW, MRR and PSA contributed to the study design. SKG, GM, CGM, CDA and MRR developed the contents and gave the educational sessions to patients. Also, SKG, GM, CGM, CDA and MRR recruited participants and collected data. YRF, MAGB and HGP contributed to the statistical analyses. YRF, ARS, LGP, AMW and PSA were part of the writing committee of the manuscript. All authors reviewed, commented on, and approved the final manuscript.

The INDICA team included the following members (alphabetical order): Abraham Pérez de la Rosa (Canary Islands Health Research Institute Foundation, FIISC), Alicia Pareja Ríos (University Hospital of Canary Island), Andrés Sifre Perello (Molina Orosa Hospital), Ángela Trinidad Gutiérrez Pérez (Primary Care of Gran Canaria), Antonio Cabrera de León (Ntra Sra de la Candelaria University Hospital), Antonio García Quintana (Dr. Negrín University Hospital), Armando Carrillo Domínguez (Insular University Hospital), Bernardo Eusebio Herrera Domínguez (General de La Palma Hospital), Carlos Sedeño Pérez (Primary Care of Tenerife), Carlos Ramírez Álamo (Primary Care of Gran Canaria), Cecilia Lobos Soto (Insular University Hospital), Cristina Padrón Pérez (Canary Islands Health Research Institute Foundation, FIISC), Dácil Alvarado Martel (Dr. Negrín University Hospital), Daniel Hernández Obregón (Dr. Negrín University Hospital), Dulce N. Hernández Correa (Primary Care of Gran Canaria),

1  
2  
3 Elsa Espinosa Pozuelo (Diabetes Patient' association of Tenerife), Elsa Florido Mayor  
4 (Canary Islands Health Research Institute Foundation, FIISC), Engracia Pinilla  
5 Domínguez (Ntra Sra de la Candelaria University Hospital), Fátima Herrera García  
6 (University Hospital of Canary Island), Félix Bonilla Aguiar (Dr. José Molina Hospital),  
7 Francisco Cabrera López (Insular University Hospital), Gloria Guerra de la Torre  
8 (Primary Care of Gran Canaria), Gregorio Muelas Martín (Dr. Negrín University  
9 Hospital), Héctor de la Rosa Merino (Canary Islands Health Research Institute  
10 Foundation, FIISC), Ignacio García Puente (Dr. Negrín University Hospital), Ignacio  
11 Llorente Gómez de Segura (Ntra Sra de la Candelaria University Hospital), Isabel García  
12 Calcerrada (Ntra Sra de la Candelaria University Hospital), Jacqueline Álvarez Pérez  
13 (Canary Islands Health Research Institute Foundation, FIISC), Jorge Federico Aldunate  
14 Page (Insular University Hospital), Jose Antonio García Dopico (University Hospital of  
15 Canary Island), Juan Andrés Báez Hernández (Primary Care of La Palma), Juan José  
16 Pérez Valencia (Primary Care of Tenerife), Julia Charlotte Wiebe (Dr. Negrín University  
17 Hospital), Lilisbeth Perestelo Pérez (Evaluation Unit, SESCO, Canary Islands Health  
18 Service, SCS), Leopoldo Martín Martín (Hospital General de La Palma), Luis Morcillo  
19 Herrera (University Hospital of Canary Island), Marcos Estupiñán Ramírez (Canary  
20 Islands Health Service, SCS), María Inmaculada González Pérez (Ntra Sra de la  
21 Candelaria University Hospital), María Isabel Visuerte Morales (University Hospital of  
22 Canary Island), María Pino Afonso Medina (Dr. Negrín University Hospital), Marta  
23 Riaño Ruiz (Insular University Hospital), Marta Tejera Santana (Dr. Negrín University  
24 Hospital), Mauro Boronat (Insular University Hospital), Mercedes Lorenzo Medina (Dr.  
25 Negrín University Hospital), Miguel Juan Mora García (Primary Care of Gran Canaria),  
26 Nayra Pérez Delgado (Ntra Sra de la Candelaria University Hospital), Pablo Pedrianez  
27 Martín (Dr. Negrín University Hospital), Pedro de Pablos- Velasco (Dr. Negrín  
28 University Hospital), Pilar Peláez Alba (La Laguna University), Rafael Valcárcel  
29 (Primary Care of Tenerife), Remedios Castro Sánchez (Primary Care of Gran Canaria),  
30 Rodrigo Abreu González (Ntra Sra de la Candelaria University Hospital), Rosa Borges  
31 Trujillo (Dr. Negrín University Hospital), Víctor Lorenzo Sellarés (University Hospital  
32 of Canary Island).

## REFERENCES

1. Renders CM, Valk GD, Griffin SJ, et al. Interventions to improve the management of diabetes in primary care, outpatient, and community settings: a systematic review. *Diabetes Care* 2001;24:1821-1833. doi:10.2337/diacare.24.10.1821. PMID: 11574449.
2. Al Sayah F, Majumdar SR, Williams B, et al. Health literacy and health outcomes in diabetes: a systematic review. *J Gen Intern Med* 2013;28:444-52. doi: 10.1007/s11606-012-2241-z. PMID: 23065575.
3. Pouwer F, Nefs G, Nouwen A. Adverse effects of depression on glycemic control and health outcomes in people with diabetes: a review. *Endocrinol Metab Clin North Am* 2013;42:529-544. doi: 10.1016/j.ecl.2013.05.002. PMID: 24011885.
4. Chen YC, Li IC. Effectiveness of interventions using empowerment concept for patients with chronic disease: a systematic review. *JBI Libr Syst Rev* 2009;7:1179-1233. doi: 10.11124/01938924-200907270-00001. PMID: 27819885.
5. Borg S, Eeg-Olofsson K, Palaszewski B, et al. Patient-reported outcome and experience measures for diabetes: development of scale models, differences between patient groups and relationships with cardiovascular and diabetes complication risk factors, in a combined registry and survey study in Sweden. *BMJ Open* 2019;9:e025033. doi:10.1136/bmjopen-2018-025033. PMID: 30612113.
6. Peyrot M, Rubin RR, Lauritzen T, et al. Patient and provider perceptions of care for diabetes: results of the cross-national DAWN Study. *Diabetologia* 2006;49:279-88. doi: 10.1007/s00125-005-0048-8. PMID: 16397792.
7. Skovlund SE, Lichtenberg TH, Hessler D, et al. Can the Routine Use of Patient-Reported Outcome Measures Improve the Delivery of Person-Centered Diabetes Care? A Review of Recent Developments and a Case Study. *Curr Diab Rep* 2019;19:84. doi:10.1007/s11892-019-1190-x. PMID: 31420754.
8. Ramallo-Fariña Y, García-Pérez L, Castilla-Rodríguez I, et al. Effectiveness and cost-effectiveness of knowledge transfer and behavior modification interventions in type 2 diabetes mellitus patients--the INDICA study: a cluster randomized controlled trial. *Implement Sci* 2015;10:47. doi:10.1186/s13012-015-0233-1. PMID: 25880498.
9. Ramallo-Fariña Y, García-Bello MA, García-Pérez L, et al. Effectiveness of Internet-Based Multicomponent Interventions for Patients and Health Care Professionals to Improve Clinical Outcomes in Type 2 Diabetes Evaluated Through the INDICA Study: Multiarm Cluster Randomized Controlled Trial. *JMIR Mhealth Uhealth* 2020;8:e18922. doi:10.2196/18922. PMID: 33136059.
10. García-Pérez L, Ramallo-Fariña Y, Vallejo-Torres L, et al. Cost-effectiveness of multicomponent interventions in type 2 diabetes mellitus in a cluster randomized controlled trial: the INDICA Study. *Primary Care Diabetes*.
11. De Rekeneire N, Resnick HE, Schwartz AV, et al. Diabetes is associated with subclinical functional limitation in nondisabled older individuals: the Health, Aging, and Body Composition study. *Diabetes Care* 2003;26:3257-3263. doi:10.2337/diacare.26.12.3257. PMID: 14633811.



12. Selvin E, Coresh J, Golden SH, et al. Glycemic control and coronary heart disease risk in persons with and without diabetes: the atherosclerosis risk in communities study. *Arch Intern Med* 2005;165:1910-1916. doi:10.1001/archinte.165.16.1910. PMID: 16157837.
13. Diabetes Control and Complications Trial Research Group, Nathan DM, Genuth S, et al. The effect of intensive treatment of diabetes on the development and progression of long-term complications in insulin-dependent diabetes mellitus. *N Engl J Med* 1993;329:977-986. doi:10.1056/NEJM199309303291401. PMID: 8366922.
14. Intensive blood-glucose control with sulphonylureas or insulin compared with conventional treatment and risk of complications in patients with type 2 diabetes (UKPDS 33). UK Prospective Diabetes Study (UKPDS) Group [published correction appears in *Lancet* 1999 Aug 14;354:602]. *Lancet* 1998;352:837-853. doi: [https://doi.org/10.1016/S0140-6736\(98\)07019-6](https://doi.org/10.1016/S0140-6736(98)07019-6)
15. Katon WJ, Rutter C, Simon G, et al. The association of comorbid depression with mortality in patients with type 2 diabetes. *Diabetes Care* 2005;28:2668-2672. doi:10.2337/diacare.28.11.2668. PMID: 16249537.
16. Eastman RC, Javitt JC, Herman WH, et al. Model of complications of NIDDM. II. Analysis of the health benefits and cost-effectiveness of treating NIDDM with the goal of normoglycemia. *Diabetes Care* 1997;20:735-744. doi:10.2337/diacare.20.5.735. PMID: 9135935.
17. Goldney RD, Phillips PJ, Fisher LJ, et al. Diabetes, depression, and quality of life: a population study. *Diabetes Care* 2004;27:1066-1070. doi:10.2337/diacare.27.5.1066. PMID: 15111522.
18. Michie S, Johnston M, Francis J, et al. From theory to intervention: mapping theoretically derived behavioural determinants to behaviour change techniques. *Appl Psychol* 2008;57:660-680. <https://doi.org/10.1111/j.1464-0597.2008.00341.x>
19. Anderson RM, Fitzgerald JT, Gruppen LD, et al. The Diabetes Empowerment Scale-Short Form (DES-SF). *Diabetes Care* 2003;26:1641-1642. doi:10.2337/diacare.26.5.1641-a. PMID: 12716841.
20. Martínez-González MA, García-Arellano A, Toledo E, et al. A 14-item Mediterranean diet assessment tool and obesity indexes among high-risk subjects: the PREDIMED trial. *PLoS One* 2012;7:e43134. doi:10.1371/journal.pone.0043134. PMID: 22905215.
21. Morisky DE, Green LW, Levine DM. Concurrent and predictive validity of a self-reported measure of medication adherence. *Med Care* 1986;24:67-74. doi:10.1097/00005650-198601000-00007. PMID: 3945130.
22. Spielberger CD, Gorsuch RL, Lushene R. *Manual del Cuestionario de Ansiedad Estado-Rasgo (STAI)*. Madrid: TEA Ediciones, 1982.
23. Beck AT, Ward CH, Mendelson M, et al. An inventory for measuring depression. *Arch Gen Psychiatry* 1961;4:561-571. doi:10.1001/archpsyc.1961.01710120031004. PMID: 13688369.

- 1
  - 2
  - 3
  - 4
  - 5
  - 6
  - 7
  - 8
  - 9
  - 10
  - 11
  - 12
  - 13
  - 14
  - 15
  - 16
  - 17
  - 18
  - 19
  - 20
  - 21
  - 22
  - 23
  - 24
  - 25
  - 26
  - 27
  - 28
  - 29
  - 30
  - 31
  - 32
  - 33
  - 34
  - 35
  - 36
  - 37
  - 38
  - 39
  - 40
  - 41
  - 42
  - 43
  - 44
  - 45
  - 46
  - 47
  - 48
  - 49
  - 50
  - 51
  - 52
  - 53
  - 54
  - 55
  - 56
  - 57
  - 58
  - 59
  - 60
24. Fisher L, Glasgow RE, Mullan JT, et al. Development of a brief diabetes distress screening instrument. *Ann Fam Med* 2008;6:246-252. doi:10.1370/afm.842. PMID: 18474888.
25. Bradley C, Todd C, Gorton T, et al. The development of an individualized questionnaire measure of perceived impact of diabetes on quality of life: the ADDQoL. *Qual Life Res* 1999;8:79-91. doi:10.1023/a:1026485130100. PMID: 10457741.
26. Feldman EL, Stevens MJ, Thomas PK, et al. A practical two-step quantitative clinical and electrophysiological assessment for the diagnosis and staging of diabetic neuropathy. *Diabetes Care* 1994;17:1281-1289. doi:10.2337/diacare.17.11.1281. PMID: 7821168.
27. Finucane MM, Samet JH, Horton NJ. Translational methods in biostatistics: linear mixed effect regression models of alcohol consumption and HIV disease progression over time. *Epidemiol Perspect Innov* 2007;4:8. doi:10.1186/1742-5573-4-8. PMID: 17880699.
28. White IR, Royston P, Wood AM. Multiple imputation using chained equations: Issues and guidance for practice. *Stat Med* 2011;30:377-399. doi:10.1002/sim.4067. PMID: 21225900.
29. Enders CK. *Applied Missing Data Analysis*. New York, NY, The Guilford Press, 2010. ISBN: 9781606236390
30. StataCorp. 2017. *Stata Statistical Software: Release 15*. College Station, TX: StataCorp LLC.
31. Aquino JA, Baldoni NR, Flôr CR, et al. Effectiveness of individual strategies for the empowerment of patients with diabetes mellitus: A systematic review with meta-analysis. *Prim Care Diabetes* 2018;12:97-110. doi:10.1016/j.pcd.2017.10.004. PMID: 29162491.
32. Baldoni NR, Aquino JA, Sanches-Giraud C, et al. Collective empowerment strategies for patients with Diabetes Mellitus: A systematic review and meta-analysis. *Prim Care Diabetes* 2017;11:201-211. doi:10.1016/j.pcd.2016.09.006. PMID: 27780683.
33. Haider R, Sudini L, Chow CK, et al. Mobile phone text messaging in improving glycaemic control for patients with type 2 diabetes mellitus: A systematic review and meta-analysis. *Diabetes Res Clin Pract* 2019;150:27-37. doi:10.1016/j.diabres.2019.02.022. PMID: 30822496.
34. Hou C, Xu Q, Diao S, et al. Mobile phone applications and self-management of diabetes: A systematic review with meta-analysis, meta-regression of 21 randomized trials and GRADE. *Diabetes Obes Metab* 2018;20:2009-2013. doi:10.1111/dom.13307. PMID: 29582538.
35. Wu Y, Yao X, Vespasiani G, et al. Correction: Mobile App-Based Interventions to Support Diabetes Self-Management: A Systematic Review of Randomized Controlled Trials to Identify Functions Associated with Glycemic Efficacy. *JMIR Mhealth Uhealth* 2018;6:e20. doi: 10.2196/mhealth.8789. PMID: 29334479.

- 1  
2  
3 36. Hartmann-Boyce J, Chepkin SC, Ye W, et al. Nicotine replacement therapy versus  
4 control for smoking cessation. *Cochrane Database Syst Rev* 2018;5:CD000146.  
5 doi:10.1002/14651858.CD000146.pub5. PMID: 29852054.  
6  
7 37. Légaré F, Adekpedjou R, Stacey D, et al. Interventions for increasing the use of  
8 shared decision making by healthcare professionals. *Cochrane Database Syst Rev*  
9 2018;7:CD006732. doi:10.1002/14651858.CD006732.pub4. PMID: 30025154.  
10  
11 38. Medical Advisory Secretariat. Behavioural interventions for type 2 diabetes: an  
12 evidence-based analysis. *Ont Health Technol Assess Ser* 2009;9:1-45. PMID:  
13 23074526.  
14  
15 39. Peters RM, Lui M, Patel K, et al. Improving Glycemic Control With a Standardized  
16 Text-Message and Phone-Based Intervention: A Community Implementation. *JMIR*  
17 *Diabetes* 2017;2:e15. doi:10.2196/diabetes.7910. PMID: 30291063.  
18  
19 40. Masson SC, Tejani AM. Minimum clinically important differences identified for  
20 commonly used depression rating scales. *J Clin Epidemiol* 2013;66:805-807.  
21 doi:10.1016/j.jclinepi.2013.01.010. PMID: 23618794.  
22  
23  
24  
25  
26  
27  
28  
29  
30  
31  
32  
33  
34  
35  
36  
37  
38  
39  
40  
41  
42  
43  
44  
45  
46  
47  
48  
49  
50  
51  
52  
53  
54  
55  
56  
57  
58  
59  
60

Table 1. Adjusted difference in the mean of each group compared to the control group

|                                                                                                          | 6 Months               | p value     | 12 Months              | p value          | 18 Months             | p value          | 24 Months              | p value          |
|----------------------------------------------------------------------------------------------------------|------------------------|-------------|------------------------|------------------|-----------------------|------------------|------------------------|------------------|
| <b>Cognitive- attitudinal outcomes</b>                                                                   |                        |             |                        |                  |                       |                  |                        |                  |
| <b>Knowledge (DIATEK):</b> F=47.3 p<0.001; ICC PHCP =0.06 ICC; subject PHCP=0.35                         |                        |             |                        |                  |                       |                  |                        |                  |
| PTI                                                                                                      | -                      | -           | 0.64 (0.17 to 1.11)    | <b>0.007</b>     | -                     | -                | 0.65 (0.2 to 1.11)     | <b>0.005</b>     |
| PFI                                                                                                      | -                      | -           | -0.38 (-0.85 to 0.09)  | 0.11             | -                     | -                | -0.6 (-1.06 to -0.14)  | <b>0.01</b>      |
| CBI                                                                                                      | -                      | -           | 0.63 (0.16 to 1.11)    | <b>0.008</b>     | -                     | -                | 0.34 (-0.12 to 0.8)    | 0.15             |
| <b>Empowerment (DES-SF):</b> F=17.3 p<0.001; ICC PHCP =0.08 ICC; subject PHCP=0.08                       |                        |             |                        |                  |                       |                  |                        |                  |
| PTI                                                                                                      | -                      | -           | 1.58 (-0.59 to 3.75)   | 0.15             | -                     | -                | 3.04 (1.08 to 4.99)    | <b>0.002</b>     |
| PFI                                                                                                      | -                      | -           | 3.95 (1.9 to 6)        | <b>&lt;0.001</b> | -                     | -                | 1.84 (-0.11 to 3.79)   | 0.07             |
| CBI                                                                                                      | -                      | -           | 3.97 (1.9 to 6.04)     | <b>&lt;0.001</b> | -                     | -                | 2.63 (0.68 to 4.58)    | <b>0.008</b>     |
| <b>Behavioral outcomes</b>                                                                               |                        |             |                        |                  |                       |                  |                        |                  |
| <b>Adherence dietary recommendations (MEDAS):</b> F=25.0 p<0.001; ICC PHCP = 0.03; ICC subject PHCP=0.20 |                        |             |                        |                  |                       |                  |                        |                  |
| PTI                                                                                                      | 0.22 (-0.25 to 0.69)   | 0.36        | 0.71 (0.17 to 1.24)    | <b>0.01</b>      | 0.93 (0.46 to 1.41)   | <b>&lt;0.001</b> | 0.87 (0.4 to 1.35)     | <b>&lt;0.001</b> |
| PFI                                                                                                      | -0.58 (-1.04 to -0.11) | <b>0.01</b> | -0.96 (-1.46 to -0.47) | <b>&lt;0.001</b> | 0.17 (-0.31 to 0.64)  | 0.49             | 0.03 (-0.44 to 0.5)    | 0.90             |
| CBI                                                                                                      | 0.44 (-0.03 to 0.91)   | 0.06        | 0.06 (-0.47 to 0.58)   | 0.83             | 0.88 (0.4 to 1.35)    | <b>&lt;0.001</b> | 0.7 (0.22 to 1.17)     | <b>0.004</b>     |
| <b>Medication adherence (MGLS):</b> F=14.4 p<0.001; ICC PHCP =0.04; ICC subject PHCP=0.20                |                        |             |                        |                  |                       |                  |                        |                  |
| PTI                                                                                                      | 0.09 (-0.11 to 0.3)    | 0.37        | 0.09 (-0.12 to 0.3)    | 0.39             | 0.13 (-0.09 to 0.34)  | 0.24             | 0.16 (-0.04 to 0.36)   | 0.12             |
| PFI                                                                                                      | 0.01 (-0.2 to 0.22)    | 0.90        | -0.13 (-0.34 to 0.08)  | 0.24             | -0.06 (-0.26 to 0.15) | 0.58             | 0.09 (-0.11 to 0.3)    | 0.39             |
| CBI                                                                                                      | 0.03 (-0.18 to 0.24)   | 0.77        | -0.19 (-0.41 to 0.03)  | 0.08             | 0 (-0.21 to 0.21)     | 0.98             | -0.1 (-0.31 to 0.11)   | 0.36             |
| <b>Affective outcomes</b>                                                                                |                        |             |                        |                  |                       |                  |                        |                  |
| <b>Depression (BDI-II):</b> F=53.6 p<0.001; ICC PHCP = 0.05; ICC subject PHCP=0.34                       |                        |             |                        |                  |                       |                  |                        |                  |
| PTI                                                                                                      | -                      | -           | -1.91 (-3.99 to 0.17)  | 0.07             | -                     | -                | -0.76 (-2.68 to 1.16)  | 0.44             |
| PFI                                                                                                      | -                      | -           | -2.99 (-4.99 to -1)    | <b>0.003</b>     | -                     | -                | 0.37 (-1.56 to 2.3)    | 0.71             |
| CBI                                                                                                      | -                      | -           | -3 (-5.13 to -0.87)    | <b>0.006</b>     | -                     | -                | 0.23 (-1.73 to 2.19)   | 0.82             |
| <b>Anxiety (STAI-S):</b> F=36.0 p<0.001; ICC PHCP =0.07 ICC; subject PHCP=0.32                           |                        |             |                        |                  |                       |                  |                        |                  |
| PTI                                                                                                      | -                      | -           | -2.25 (-5.75 to 1.25)  | 0.21             | -                     | -                | -2.18 (-5.54 to 1.18)  | 0.20             |
| PFI                                                                                                      | -                      | -           | -3.47 (-6.95 to 0.02)  | <b>0.05</b>      | -                     | -                | -0.39 (-3.78 to 2.99)  | 0.82             |
| CBI                                                                                                      | -                      | -           | -5.4 (-8.99 to -1.81)  | <b>0.003</b>     | -                     | -                | -0.50 (-3.9 to 2.9)    | 0.77             |
| <b>Distress (DDS2):</b> F=14.9 p<0.001; ICC PHCP =.05 ICC; subject PHCP=0.25                             |                        |             |                        |                  |                       |                  |                        |                  |
| PTI                                                                                                      | -                      | -           | -0.23 (-0.53 to 0.07)  | 0.13             | -                     | -                | -0.34 (-0.62 to -0.07) | <b>0.01</b>      |
| PFI                                                                                                      | -                      | -           | -0.24 (-0.53 to 0.05)  | 0.10             | -                     | -                | -0.31 (-0.58 to -0.04) | <b>0.03</b>      |

1  
2  
3  
4  
5  
6  
7  
8  
9  
10  
11  
12  
13  
14  
15  
16  
17  
18  
19  
20  
21  
22  
23  
24  
25  
26  
27  
28  
29  
30  
31  
32  
33  
34  
35  
36  
37  
38  
39  
40  
41  
42  
43  
44  
45  
46

|                                                                                                            |                       |      |                        |                  |                       |             |                       |      |
|------------------------------------------------------------------------------------------------------------|-----------------------|------|------------------------|------------------|-----------------------|-------------|-----------------------|------|
| CBI                                                                                                        | -                     | -    | -0.36 (-0.65 to -0.07) | <b>0.01</b>      | -                     | -           | -0.24 (-0.51 to 0.03) | 0.08 |
| <b>Health- related quality of life and symptoms</b>                                                        |                       |      |                        |                  |                       |             |                       |      |
| <b>Health- related quality of life (ADDQoL-19):</b> F=25.3 p<0.001; ICC PHCP = 0.04; ICC subject PHCP=0.34 |                       |      |                        |                  |                       |             |                       |      |
| PTI                                                                                                        | 0.09 (-0.24 to 0.42)  | 0.60 | 0.40 (0.04 to 0.76)    | <b>0.03</b>      | 0.39 (0.05 to 0.72)   | <b>0.02</b> | 0.16 (-0.17 to 0.48)  | 0.34 |
| PFI                                                                                                        | -0.09 (-0.42 to 0.23) | 0.56 | 0.51 (0.16 to 0.86)    | <b>0.005</b>     | -0.02 (-0.35 to 0.31) | 0.89        | -0.06 (-0.38 to 0.26) | 0.71 |
| CBI                                                                                                        | 0.03 (-0.3 to 0.35)   | 0.88 | 0.84 (0.49 to 1.18)    | <b>&lt;0.001</b> | 0.21 (-0.13 to 0.54)  | 0.23        | -0.05 (-0.38 to 0.28) | 0.77 |
| <b>Neuropathic symptom (MNSI):</b> F=59.8 p<0.001; ICC PHCP =0.02 ICC; subject PHCP=0.32                   |                       |      |                        |                  |                       |             |                       |      |
| PTI                                                                                                        | -                     | -    | -0.35 (-0.8 to 0.09)   | 0.12             | -                     | -           | -0.08 (-0.49 to 0.33) | 0.70 |
| PFI                                                                                                        | -                     | -    | -0.42 (-0.87 to 0.03)  | 0.07             | -                     | -           | 0.35 (-0.07 to 0.78)  | 0.11 |
| CBI                                                                                                        | -                     | -    | -0.57 (-1.04 to -0.1)  | <b>0.02</b>      | -                     | -           | 0.31 (-0.12 to 0.74)  | 0.16 |

CBI Is a combined intervention for patients and professionals; ICC Intraclass correlation coefficient; PFI Intervention only for healthcare professionals at primary care; PTI Intervention only for patients and family members; PHCP Primary Care Health Practices

Table 2. Adjusted means for each group and intragroup differences compared with the baseline measurement

|                                                  | Adjusted means in each group (95%CI) |                     |                        |                     |                        | Difference in intragroup of adjusted means compared to baseline (95%CI) |                  |                          |                  |                          |                  |                          |                  |
|--------------------------------------------------|--------------------------------------|---------------------|------------------------|---------------------|------------------------|-------------------------------------------------------------------------|------------------|--------------------------|------------------|--------------------------|------------------|--------------------------|------------------|
|                                                  | Baseline                             | 6 Months            | 12 Months              | 18 Months           | 24 Months              | B-6M                                                                    | p value          | B-12M                    | p value          | B-18M                    | p value          | B-24M                    | p value          |
| <b>Cognitive-attitudinal outcomes</b>            |                                      |                     |                        |                     |                        |                                                                         |                  |                          |                  |                          |                  |                          |                  |
| <b>Knowledge (DIATEK)</b>                        |                                      |                     |                        |                     |                        |                                                                         |                  |                          |                  |                          |                  |                          |                  |
| PTI                                              | 6.4<br>(6.3 to 6.5)                  | -                   | 7.2<br>(6.9 to 7.5)    | -                   | 7.4<br>(7.1 to 7.7)    | -                                                                       | -                | 0.82<br>(0.48 to 1.2)    | <b>&lt;0.001</b> | -                        | -                | 1.03<br>(0.71 to 1.36)   | <b>&lt;0.001</b> |
| PFI                                              | 6.5<br>(6.3 to 6.7)                  | -                   | 6.2<br>(5.8 to 6.5)    | -                   | 6.1<br>(5.8 to 6.5)    | -                                                                       | -                | -0.31<br>(-0.63 to 0.02) | 0.07             | -                        | -                | -0.32<br>(-0.64 to 0.01) | 0.058            |
| CBI                                              | 6.5<br>(6.4 to 6.6)                  | -                   | 7.2<br>(6.8 to 7.5)    | -                   | 7.1<br>(6.8 to 7.4)    | -                                                                       | -                | 0.7<br>(0.36 to 1.03)    | <b>&lt;0.001</b> | -                        | -                | 0.6<br>(0.27 to 0.94)    | <b>&lt;0.001</b> |
| UC                                               | 6.2<br>(6.1 to 6.3)                  | -                   | 6.5<br>(6.2 to 6.9)    | -                   | 6.7<br>(6.4 to 7.1)    | -                                                                       | -                | 0.3<br>(-0.04 to 0.63)   | <b>0.08</b>      | -                        | -                | 0.5<br>(0.18 to 0.82)    | <b>0.002</b>     |
| <b>Empowerment (DES-SF)</b>                      |                                      |                     |                        |                     |                        |                                                                         |                  |                          |                  |                          |                  |                          |                  |
| PTI                                              | 26.4<br>(25.8 to 27.0)               | -                   | 29.5<br>(27.9 to 31.0) | -                   | 33.5<br>(32.1 to 34.9) | -                                                                       | -                | 3.08<br>(1.6 to 4.6)     | <b>&lt;0.001</b> | -                        | -                | 7.1<br>(5.7 to 8.5)      | <b>&lt;0.001</b> |
| PFI                                              | 26.3<br>(25.2 to 27.4)               | -                   | 31.9<br>(30.5 to 33.2) | -                   | 32.3<br>(30.9 to 33.7) | -                                                                       | -                | 5.6<br>(4.2 to 6.9)      | <b>&lt;0.001</b> | -                        | -                | 6.02<br>(4.7 to 7.4)     | <b>&lt;0.001</b> |
| CBI                                              | 27.6<br>(27.0 to 28.3)               | -                   | 31.9<br>(30.4 to 33.3) | -                   | 33.1<br>(31.7 to 34.5) | -                                                                       | -                | 4.3<br>(2.8 to 5.7)      | <b>&lt;0.001</b> | -                        | -                | 5.7<br>(4.1 to 6.9)      | <b>&lt;0.001</b> |
| UC                                               | 26.1<br>(25.5 to 26.7)               | -                   | 27.9<br>(26.4 to 29.4) | -                   | 30.5<br>(29.1 to 31.8) | -                                                                       | -                | 1.8<br>(0.26 to 3.3)     | <b>0.02</b>      | -                        | -                | 4.3<br>(2.9 to 5.7)      | <b>&lt;0.001</b> |
| <b>Behavioral outcomes</b>                       |                                      |                     |                        |                     |                        |                                                                         |                  |                          |                  |                          |                  |                          |                  |
| <b>Adherence dietary recommendations (MEDAS)</b> |                                      |                     |                        |                     |                        |                                                                         |                  |                          |                  |                          |                  |                          |                  |
| PTI                                              | 8<br>(7.8 to 8.1)                    | 7.6<br>(7.2 to 7.9) | 9.1<br>(8.7 to 9.4)    | 8.3<br>(7.9 to 8.6) | 8.7<br>(8.3 to 9)      | -0.43<br>(-0.77 to -0.09)                                               | <b>0.01</b>      | 1.1<br>(0.71 to 1.5)     | <b>&lt;0.001</b> | 0.27<br>(-0.07 to 0.62)  | 0.12             | 0.68<br>(0.34 to 1.02)   | <b>&lt;0.001</b> |
| PFI                                              | 8.2<br>(7.9 to 8.5)                  | 6.8<br>(6.4 to 7.1) | 7.4<br>(7.1 to 7.7)    | 7.5<br>(7.1 to 7.8) | 7.8<br>(7.5 to 8.2)    | -1.5<br>(-1.8 to -1.1)                                                  | <b>&lt;0.001</b> | -0.82<br>(-1.2 to -0.49) | <b>&lt;0.001</b> | -0.82<br>(-1.2 to -0.49) | <b>&lt;0.001</b> | -0.4<br>(-0.74 to -0.07) | <b>0.018</b>     |
| CBI                                              | 8.3<br>(8.1 to 8.5)                  | 7.8<br>(7.4 to 8.1) | 8.4<br>(8.0 to 8.8)    | 8.2<br>(7.9 to 8.5) | 8.5<br>(8.1 to 8.8)    | -0.51<br>(-0.84 to -0.17)                                               | <b>0.003</b>     | 0.13<br>(-0.24 to 0.51)  | 0.49             | -0.08<br>(-0.43 to 0.26) | 0.63             | 0.2<br>(-0.14 to 0.54)   | 0.26             |
| UC                                               | 8.02<br>(7.9 to 8.2)                 | 7.3<br>(7.0 to 7.7) | 8.4<br>(8.0 to 8.7)    | 7.3<br>(7.0 to 7.7) | 7.8<br>(7.5 to 8.1)    | -0.69<br>(-1.0 to -0.36)                                                | <b>&lt;0.001</b> | 0.34<br>(-0.02 to 0.7)   | 0.07             | -0.7<br>(-1.0 to -0.37)  | <b>&lt;0.001</b> | -0.24<br>(-0.57 to 0.1)  | 0.16             |
| <b>Medication adherence (MGLS)</b>               |                                      |                     |                        |                     |                        |                                                                         |                  |                          |                  |                          |                  |                          |                  |
| PTI                                              | 3.1<br>(3.1 to 3.2)                  | 3.5<br>(3.4 to 3.7) | 3.6<br>(3.4 to 3.7)    | 3.6<br>(3.5 to 3.8) | 3.6<br>(3.5 to 3.7)    | 0.41<br>(0.26 to 0.56)                                                  | <b>&lt;0.001</b> | 0.45<br>(0.29 to 0.6)    | <b>&lt;0.001</b> | 0.5<br>(0.35 to 0.65)    | <b>&lt;0.001</b> | 0.48<br>(0.33 to 0.62)   | <b>&lt;0.001</b> |

|    |                                                     |                        |                        |                         |                          |                           |                        |                  |                           |                  |                        |                  |                           |                  |
|----|-----------------------------------------------------|------------------------|------------------------|-------------------------|--------------------------|---------------------------|------------------------|------------------|---------------------------|------------------|------------------------|------------------|---------------------------|------------------|
| 1  |                                                     |                        |                        |                         |                          |                           |                        |                  |                           |                  |                        |                  |                           |                  |
| 2  |                                                     |                        |                        |                         |                          |                           |                        |                  |                           |                  |                        |                  |                           |                  |
| 3  |                                                     |                        |                        |                         |                          |                           |                        |                  |                           |                  |                        |                  |                           |                  |
| 4  | PFI                                                 | 3.3<br>(3.2 to 3.3)    | 3.5<br>(3.3 to 3.6)    | 3.3<br>(3.2 to 3.5)     | 3.4<br>(3.3 to 3.6)      | 3.5<br>(3.4 to 3.7)       | 0.18<br>(0.03 to 0.33) | <b>0.02</b>      | 0.08<br>(-0.07 to 0.22)   | 0.32             | 0.16<br>(0.02 to 0.31) | <b>0.026</b>     | 0.25<br>(0.11 to 0.4)     | <b>0.001</b>     |
| 5  | CBI                                                 | 3.3<br>(3.3 to 3.3)    | 3.5<br>(3.3 to 3.6)    | 3.3<br>(3.1 to 3.4)     | 3.5<br>(3.3 to 3.6)      | 3.3<br>(3.2 to 3.5)       | 0.17<br>(0.02 to 0.32) | <b>0.02</b>      | -0.01<br>(-0.18 to 0.15)  | 0.87             | 0.2<br>(0.05 to 0.35)  | <b>0.01</b>      | 0.04<br>(-0.11 to 0.2)    | 0.60             |
| 6  | UC                                                  | 3.2<br>(3.1 to 3.3)    | 3.4<br>(3.3 to 3.6)    | 3.5<br>(3.3 to 3.6)     | 3.5<br>(3.3 to 3.6)      | 3.4<br>(3.3 to 3.6)       | 0.23<br>(0.08 to 0.38) | <b>0.002</b>     | 0.27<br>(0.12 to 0.42)    | <b>&lt;0.001</b> | 0.29<br>(0.14 to 0.43) | <b>&lt;0.001</b> | 0.23<br>(0.08 to 0.37)    | <b>0.002</b>     |
| 7  | <b>Affective outcomes</b>                           |                        |                        |                         |                          |                           |                        |                  |                           |                  |                        |                  |                           |                  |
| 8  | <b>Depression (BDI-II)</b>                          |                        |                        |                         |                          |                           |                        |                  |                           |                  |                        |                  |                           |                  |
| 9  | PTI                                                 | 10.9<br>(10.4 to 11.5) | -                      | 8.5<br>(7.1 to 9.9)     | -                        | 6.1<br>(4.7 to 7.5)       | -                      | -                | -2.4<br>(-3.7 to -0.96)   | <b>0.001</b>     | -                      | -                | -4.9<br>(-6.2 to -3.5)    | <b>&lt;0.001</b> |
| 10 | PFI                                                 | 11.0<br>(9.9 to 12.1)  | -                      | 7.5<br>(6.1 to 8.8)     | -                        | 7.2<br>(5.8 to 8.6)       | -                      | -                | -3.6<br>(-4.9 to -2.2)    | <b>&lt;0.001</b> | -                      | -                | -3.8<br>(-5.2 to -2.4)    | <b>&lt;0.001</b> |
| 11 | CBI                                                 | 11.7<br>(10.9 to 12.4) | -                      | 7.5<br>(5.9 to 8.9)     | -                        | 7.1<br>(5.7 to 8.5)       | -                      | -                | -4.2<br>(-5.7 to -2.7)    | <b>&lt;0.001</b> | -                      | -                | -4.6<br>(-5.9 to -3.1)    | <b>&lt;0.001</b> |
| 12 | UC                                                  | 11.4<br>(10.9 to 11.9) | -                      | 10.5<br>(8.9 to 11.9)   | -                        | 6.7<br>(5.5 to 8.2)       | -                      | -                | -0.94<br>(-2.4 to 0.55)   | 0.22             | -                      | -                | -4.5<br>(-5.9 to -3.2)    | <b>&lt;0.001</b> |
| 13 | <b>Anxiety (STAI-S)</b>                             |                        |                        |                         |                          |                           |                        |                  |                           |                  |                        |                  |                           |                  |
| 14 | PTI                                                 | 21.5<br>(20.7 to 22.2) | -                      | 18.4<br>(15.9 to 20.9)  | -                        | 14.5<br>(12.0 to 16.9)    | -                      | -                | -3.0<br>(-5.5 to -0.55)   | <b>0.017</b>     | -                      | -                | -7<br>(-9.4 to -4.6)      | <b>&lt;0.001</b> |
| 15 | PFI                                                 | 20.6<br>(18.8 to 22.4) | -                      | 17.2<br>(14.8 to 19.6)  | -                        | 16.2<br>(13.8 to 18.7)    | -                      | -                | -3.4<br>(-5.8 to -1)      | <b>0.006</b>     | -                      | -                | -4.4<br>(-6.8 to -1.9)    | <b>&lt;0.001</b> |
| 16 | CBI                                                 | 23.2<br>(22.0 to 24.3) | -                      | 15.3<br>(12.8 to 17.8)  | -                        | 16.1<br>(13.7 to 18.6)    | -                      | -                | -7.9<br>(-10.4 to -5.4)   | <b>&lt;0.001</b> | -                      | -                | -7.0<br>(-9.5 to -4.6)    | <b>&lt;0.001</b> |
| 17 | UC                                                  | 21.9<br>(21.2 to 22.7) | -                      | 20.7<br>(18.1 to 23.2)  | -                        | 16.6<br>(14.3 to 19.0)    | -                      | -                | -1.3<br>(-3.8 to 1.3)     | 0.32             | -                      | -                | -5.3<br>(-7.7 to -2.9)    | <b>&lt;0.001</b> |
| 18 | <b>Distress (DDS2)</b>                              |                        |                        |                         |                          |                           |                        |                  |                           |                  |                        |                  |                           |                  |
| 19 | PTI                                                 | 2.8<br>(2.6 to 2.8)    | -                      | 1.9<br>(1.7 to 2.2)     | -                        | 1.6<br>(1.4 to 1.8)       | -                      | -                | -0.72<br>(-0.93 to -0.51) | <b>&lt;0.001</b> | -                      | -                | -1.1<br>(-1.2 to -0.86)   | <b>&lt;0.001</b> |
| 20 | PFI                                                 | 2.5<br>(2.3 to 2.6)    | -                      | 1.9<br>(1.8 to 2.1)     | -                        | 1.7<br>(1.5 to 1.9)       | -                      | -                | -0.5<br>(-0.7 to -0.31)   | <b>&lt;0.001</b> | -                      | -                | -0.79<br>(-0.98 to -0.6)  | <b>&lt;0.001</b> |
| 21 | CBI                                                 | 2.7<br>(2.6 to 2.8)    | -                      | 1.8<br>(1.6 to 2.0)     | -                        | 1.7<br>(1.5 to 1.9)       | -                      | -                | -0.91<br>(-1.1 to -0.71)  | <b>&lt;0.001</b> | -                      | -                | -1.01<br>(-1.2 to -0.82)  | <b>&lt;0.001</b> |
| 22 | UC                                                  | 2.6<br>(2.5 to 2.6)    | -                      | 2.1<br>(1.9 to 2.4)     | -                        | 1.97<br>(1.8 to 2.2)      | -                      | -                | -0.36<br>(-0.58 to -0.15) | <b>0.001</b>     | -                      | -                | -0.58<br>(-0.77 to -0.39) | <b>&lt;0.001</b> |
| 23 | <b>Health- related quality of life and symptoms</b> |                        |                        |                         |                          |                           |                        |                  |                           |                  |                        |                  |                           |                  |
| 24 | <b>Health- related quality of life (ADDQoL-19)</b>  |                        |                        |                         |                          |                           |                        |                  |                           |                  |                        |                  |                           |                  |
| 25 | PTI                                                 | -1.7<br>(-1.8 to -1.6) | -1.0<br>(-1.3 to -0.8) | -1.2<br>(-1.5 to -0.97) | -0.85<br>(-1.1 to -0.61) | -0.76<br>(-0.99 to -0.53) | 0.69<br>(0.46 to 0.93) | <b>&lt;0.001</b> | 0.52<br>(0.27 to 0.76)    | <b>&lt;0.001</b> | 0.89<br>(0.65 to 1.1)  | <b>&lt;0.001</b> | 0.97<br>(0.74 to 1.2)     | <b>&lt;0.001</b> |
| 26 | PFI                                                 | -1.7                   | -1.2                   | -1.1                    | -1.3                     | -0.98                     | 0.43                   | <b>&lt;0.001</b> | 0.55                      | <b>&lt;0.001</b> | 0.4                    | <b>0.001</b>     | 0.68                      | <b>&lt;0.001</b> |

|                                   |                |                 |                 |                 |                 |                |                  |                  |                  |                |                  |                  |
|-----------------------------------|----------------|-----------------|-----------------|-----------------|-----------------|----------------|------------------|------------------|------------------|----------------|------------------|------------------|
|                                   | (-1.8 to -1.5) | (-1.5 to -1)    | (-1.3 to -0.88) | (-1.5 to -1.0)  | (-1.2 to -0.75) | (0.21 to 0.66) |                  | (0.32 to 0.78)   |                  | (0.17 to 0.63) |                  | (0.45 to 0.9)    |
| CBI                               | -1.8           | -1.1            | -0.78           | -1.0            | -0.97           | 0.65           | <b>&lt;0.001</b> | 0.98             | <b>&lt;0.001</b> | 0.73           | <b>&lt;0.001</b> | 0.78             |
|                                   | (-1.9 to -1.6) | (-1.3 to -0.87) | (-1.0 to -0.54) | (-1.3 to -0.79) | (-1.2 to -0.73) | (0.42 to 0.88) |                  | (0.74 to 1.2)    |                  | (0.49 to 0.96) |                  | (0.54 to 1.0)    |
| UC                                | -2.1           | -1.1            | -1.6            | -1.2            | -0.92           | 0.92           | <b>&lt;0.001</b> | 0.44             | <b>0.001</b>     | 0.82           | <b>&lt;0.001</b> | 1.1              |
|                                   | (-2.2 to -1.9) | (-1.4 to -0.9)  | (-1.9 to -1.4)  | (-1.5 to -1)    | (-1.2 to -0.69) | (0.7 to 1.2)   |                  | (0.18 to 0.7)    |                  | (0.59 to 1.1)  |                  | (0.9 to 1.4)     |
| <b>Neuropathic symptom (MNSI)</b> |                |                 |                 |                 |                 |                |                  |                  |                  |                |                  |                  |
| PTI                               | 3.1            | -               | 2.8             | -               | 2.4             | -              | -                | -0.29            | 0.07             | -              | -                | -0.69            |
|                                   | (3 to 3.2)     |                 | (2.5 to 3.1)    |                 | (2.1 to 2.7)    |                |                  | (-0.61 to 0.02)  |                  |                |                  | (-0.99 to -0.4)  |
| PFI                               | 3.3            | -               | 2.8             | -               | 2.9             | -              | -                | -0.55            | <b>0.001</b>     | -              | -                | -0.45            |
|                                   | (3.0 to 3.6)   |                 | (2.5 to 3.1)    |                 | (2.5 to 3.2)    |                |                  | (-0.86 to -0.23) |                  |                |                  | (-0.76 to -0.13) |
| CBI                               | 3.3            | -               | 2.6             | -               | 2.8             | -              | -                | -0.67            | <b>&lt;0.001</b> | -              | -                | -0.46            |
|                                   | (3.1 to 3.4)   |                 | (2.3 to 2.9)    |                 | (2.5 to 3.1)    |                |                  | (-1.0 to -0.31)  |                  |                |                  | (-0.78 to -0.13) |
| UC                                | 3.3            | -               | 3.1             | -               | 2.5             | -              | -                | -0.15            | 0.36             | -              | -                | -0.82            |
|                                   | (3.2 to 3.5)   |                 | (2.9 to 3.5)    |                 | (2.2 to 2.8)    |                |                  | (-0.47 to 0.17)  |                  |                |                  | (-1.1 to -0.54)  |

CBI Is a combined intervention for patients and professionals; M: month; PFI Intervention only for healthcare professionals at primary care; PTI Intervention only for patients and family members; UC usual care or control group.



Table 3. Proportion of patients who stop smoking at each follow up compared to the control group

|                  | PTI (n=114) | PFI (n=156) | CBI (n=109) | UC (n=145) | P value global | P value<br>PTI vs UC | P value<br>PFI vs UC | P value<br>CBI vs UC |
|------------------|-------------|-------------|-------------|------------|----------------|----------------------|----------------------|----------------------|
| <b>3 Months</b>  | 15 (13.2)   | 14 (9)      | 17 (15.6)   | 15 (10.3)  | 0.54           | 0.99                 | 0.99                 | 0.99                 |
| <b>6 Months</b>  | 33 (28.9)   | 12 (7.7)    | 26 (23.9)   | 22 (15.2)  | 0.003          | 0.11                 | 0.22                 | 0.99                 |
| <b>12 Months</b> | 38 (33.3)   | 27 (17.3)   | 31 (28.4)   | 21 (14.5)  | 0.014          | 0.018                | 0.99                 | 0.11                 |
| <b>18 Months</b> | 42 (36.8)   | 31 (19.9)   | 41 (37.6)   | 27 (18.6)  | 0.004          | 0.04                 | 0.99                 | 0.03                 |
| <b>24 Months</b> | 47 (41.2)   | 37 (23.7)   | 46 (42.2)   | 31 (21.4)  | 0.002          | 0.012                | 0.99                 | 0.012                |

CBI Is a combined intervention for patients and professionals; PFI Intervention only for healthcare professionals at primary care; PTI Intervention only for patients and family members; UC usual care or control group.

Table 4. Patient satisfaction with the intervention received (only those who made use of each intervention component)

|                                                          | n   | mean (95%CI)        |
|----------------------------------------------------------|-----|---------------------|
| <b>Conventional group educational program</b>            |     |                     |
| <i>Usability</i>                                         |     |                     |
| Environment generated                                    | 592 | 9.53 (9.46 to 9.60) |
| Exchange of experiences with participants and educator   | 588 | 9.59 (9.53 to 9.66) |
| Educator's work                                          | 587 | 9.79 (9.74 to 9.83) |
| Quality of materials                                     | 587 | 9.56 (9.49 to 9.64) |
| <i>Personal satisfaction</i>                             |     |                     |
| The sessions helped me get to know my diabetes better    | 591 | 9.67 (9.61 to 9.73) |
| I found the sessions useful                              | 593 | 9.60 (9.52 to 9.67) |
| The sessions motivated me to look after my health better | 590 | 9.62 (9.55 to 9.69) |
| <i>General</i>                                           |     |                     |
| General satisfaction                                     | 589 | 9.70 (9.65 to 9.76) |
| I would recommend the sessions                           | 588 | 9.77 (9.72 to 9.82) |
| <b>Website platform</b>                                  |     |                     |
| <i>Usability</i>                                         |     |                     |
| Access to the content                                    | 253 | 8.30 (8.02 to 8.58) |
| Usability of the web                                     | 251 | 8.59 (8.33 to 8.85) |
| Patient outcomes follow up charts                        | 215 | 8.37 (8.03 to 8.72) |
| Quality of materials                                     | 229 | 8.81 (8.53 to 9.08) |
| Access to videos of the sessions                         | 216 | 8.76 (8.47 to 9.05) |
| <i>General</i>                                           |     |                     |
| General satisfaction                                     | 237 | 8.56 (8.30 to 8.82) |
| I would recommend using the website                      | 239 | 8.81 (8.56 to 9.05) |
| <b>Semi-automated mobile phone messages</b>              |     |                     |
| <i>Usability</i>                                         |     |                     |
| Reading SMS                                              | 585 | 9.51 (9.41 to 9.61) |
| Usefulness of reminders                                  | 576 | 9.33 (9.22 to 9.45) |
| <i>Personal satisfaction</i>                             |     |                     |
| They adapt to my needs                                   | 579 | 9.04 (8.90 to 9.18) |
| They motivate me to look after myself                    | 576 | 9.15 (9.02 to 9.28) |
| I would like to continue receiving them                  | 552 | 8.80 (8.59 to 9.00) |
| <i>General</i>                                           |     |                     |
| General satisfaction                                     | 572 | 9.23 (9.09 to 9.37) |

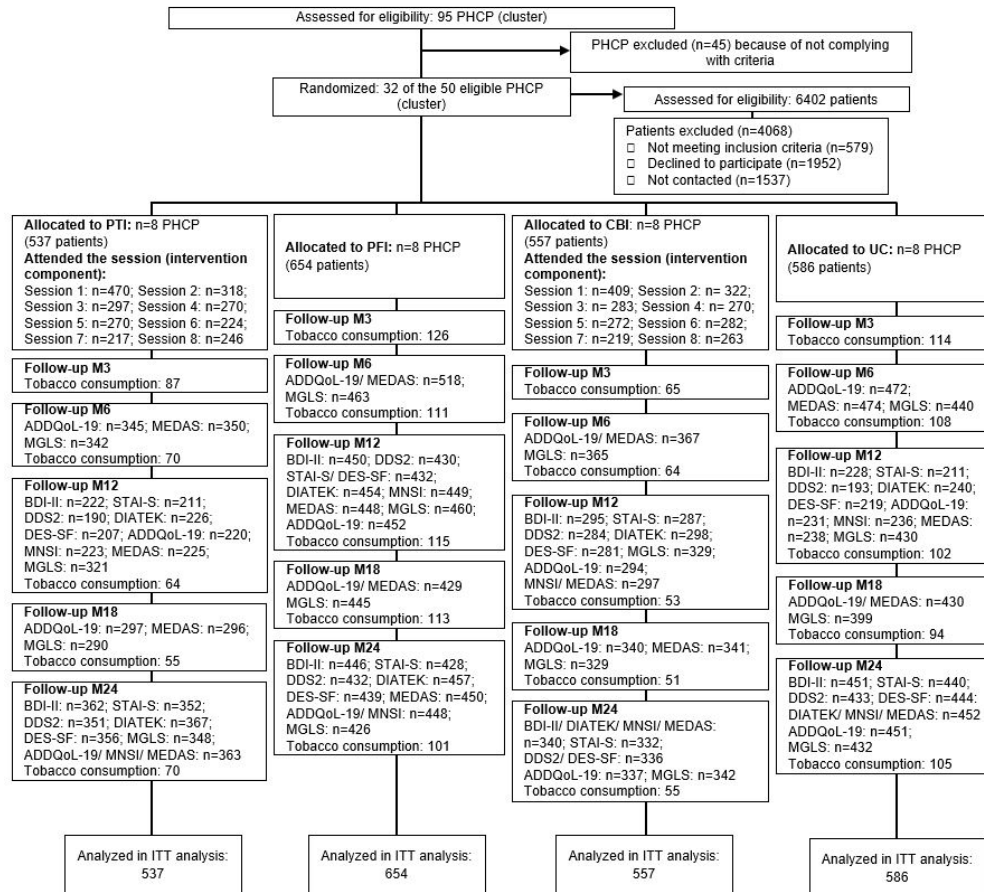

236x214mm (96 x 96 DPI)

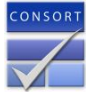

## CONSORT 2010 checklist of information to include when reporting a randomised trial\*

| Section/Topic                    | Item No | Checklist item                                                                                                                                                                              | Reported on page No        |
|----------------------------------|---------|---------------------------------------------------------------------------------------------------------------------------------------------------------------------------------------------|----------------------------|
| <b>Title and abstract</b>        |         |                                                                                                                                                                                             |                            |
|                                  | 1a      | Identification as a randomised trial in the title                                                                                                                                           | 1                          |
|                                  | 1b      | Structured summary of trial design, methods, results, and conclusions (for specific guidance see CONSORT for abstracts)                                                                     | 2                          |
| <b>Introduction</b>              |         |                                                                                                                                                                                             |                            |
| Background and objectives        | 2a      | Scientific background and explanation of rationale                                                                                                                                          | 4                          |
|                                  | 2b      | Specific objectives or hypotheses                                                                                                                                                           | 4-5                        |
| <b>Methods</b>                   |         |                                                                                                                                                                                             |                            |
| Trial design                     | 3a      | Description of trial design (such as parallel, factorial) including allocation ratio                                                                                                        | 6                          |
|                                  | 3b      | Important changes to methods after trial commencement (such as eligibility criteria), with reasons                                                                                          |                            |
| Participants                     | 4a      | Eligibility criteria for participants                                                                                                                                                       | 6                          |
|                                  | 4b      | Settings and locations where the data were collected                                                                                                                                        | 6                          |
| Interventions                    | 5       | The interventions for each group with sufficient details to allow replication, including how and when they were actually administered                                                       | 7-8                        |
| Outcomes                         | 6a      | Completely defined pre-specified primary and secondary outcome measures, including how and when they were assessed                                                                          | 8-9                        |
|                                  | 6b      | Any changes to trial outcomes after the trial commenced, with reasons                                                                                                                       | n.a.                       |
| Sample size                      | 7a      | How sample size was determined                                                                                                                                                              | See the published protocol |
|                                  | 7b      | When applicable, explanation of any interim analyses and stopping guidelines                                                                                                                | n.a.                       |
| <b>Randomisation:</b>            |         |                                                                                                                                                                                             |                            |
| Sequence generation              | 8a      | Method used to generate the random allocation sequence                                                                                                                                      | 7                          |
|                                  | 8b      | Type of randomisation; details of any restriction (such as blocking and block size)                                                                                                         | 7                          |
| Allocation concealment mechanism | 9       | Mechanism used to implement the random allocation sequence (such as sequentially numbered containers), describing any steps taken to conceal the sequence until interventions were assigned | 7                          |
| Implementation                   | 10      | Who generated the random allocation sequence, who enrolled participants, and who assigned participants to                                                                                   | 7                          |

|    |                                                      |     |                                                                                                                                                   |                                                   |
|----|------------------------------------------------------|-----|---------------------------------------------------------------------------------------------------------------------------------------------------|---------------------------------------------------|
| 1  |                                                      |     | interventions                                                                                                                                     |                                                   |
| 2  | Blinding                                             | 11a | If done, who was blinded after assignment to interventions (for example, participants, care providers, those assessing outcomes) and how          | n.a.                                              |
| 3  |                                                      |     |                                                                                                                                                   |                                                   |
| 4  |                                                      | 11b | If relevant, description of the similarity of interventions                                                                                       | n.a.                                              |
| 5  | Statistical methods                                  | 12a | Statistical methods used to compare groups for primary and secondary outcomes                                                                     | 10-11                                             |
| 6  |                                                      | 12b | Methods for additional analyses, such as subgroup analyses and adjusted analyses                                                                  | n.a.                                              |
| 7  |                                                      |     |                                                                                                                                                   |                                                   |
| 8  | <b>Results</b>                                       |     |                                                                                                                                                   |                                                   |
| 9  | Participant flow (a diagram is strongly recommended) | 13a | For each group, the numbers of participants who were randomly assigned, received intended treatment, and were analysed for the primary outcome    | Figure 1                                          |
| 10 |                                                      | 13b | For each group, losses and exclusions after randomisation, together with reasons                                                                  | Figure 1                                          |
| 11 | Recruitment                                          | 14a | Dates defining the periods of recruitment and follow-up                                                                                           | 8                                                 |
| 12 |                                                      | 14b | Why the trial ended or was stopped                                                                                                                | n.a.                                              |
| 13 | Baseline data                                        | 15  | A table showing baseline demographic and clinical characteristics for each group                                                                  | See the clinical outcomes paper published         |
| 14 |                                                      |     |                                                                                                                                                   |                                                   |
| 15 |                                                      |     |                                                                                                                                                   |                                                   |
| 16 | Numbers analysed                                     | 16  | For each group, number of participants (denominator) included in each analysis and whether the analysis was by original assigned groups           | Figure 1                                          |
| 17 | Outcomes and estimation                              | 17a | For each primary and secondary outcome, results for each group, and the estimated effect size and its precision (such as 95% confidence interval) | 12-13                                             |
| 18 |                                                      | 17b | For binary outcomes, presentation of both absolute and relative effect sizes is recommended                                                       |                                                   |
| 19 | Ancillary analyses                                   | 18  | Results of any other analyses performed, including subgroup analyses and adjusted analyses, distinguishing pre-specified from exploratory         |                                                   |
| 20 | Harms                                                | 19  | All important harms or unintended effects in each group (for specific guidance see CONSORT for harms)                                             |                                                   |
| 21 | <b>Discussion</b>                                    |     |                                                                                                                                                   |                                                   |
| 22 | Limitations                                          | 20  | Trial limitations, addressing sources of potential bias, imprecision, and, if relevant, multiplicity of analyses                                  | 16-17                                             |
| 23 | Generalisability                                     | 21  | Generalisability (external validity, applicability) of the trial findings                                                                         | 14-16                                             |
| 24 | Interpretation                                       | 22  | Interpretation consistent with results, balancing benefits and harms, and considering other relevant evidence                                     | 17                                                |
| 25 | <b>Other information</b>                             |     |                                                                                                                                                   |                                                   |
| 26 | Registration                                         | 23  | Registration number and name of trial registry                                                                                                    | 2                                                 |
| 27 | Protocol                                             | 24  | Where the full trial protocol can be accessed, if available                                                                                       | <a href="https://implement">https://implement</a> |

---

entationsci  
ce.biomedcen  
tral.com/articl  
es/10.1186/s1  
3012-015-  
0233-1

---

1  
2  
3  
4  
5  
6  
7  
8 **Funding**                      25    Sources of funding and other support (such as supply of drugs), role of funders                      18

---

9  
10  
11 \*We strongly recommend reading this statement in conjunction with the CONSORT 2010 Explanation and Elaboration for important clarifications on all the items. If relevant, we also  
12 recommend reading CONSORT extensions for cluster randomised trials, non-inferiority and equivalence trials, non-pharmacological treatments, herbal interventions, and pragmatic trials.  
13 Additional extensions are forthcoming: for those and for up to date references relevant to this checklist, see [www.consort-statement.org](http://www.consort-statement.org).  
14  
15  
16  
17  
18  
19  
20  
21  
22  
23  
24  
25  
26  
27  
28  
29  
30  
31  
32  
33  
34  
35  
36  
37  
38  
39  
40  
41  
42

# BMJ Open

**Patient-reported outcome measures for knowledge transfer and behavior modification interventions in type 2 diabetes. The INDICA study: a multi-arm cluster randomized controlled trial**

|                                 |                                                                                                                                                                                                                                                                                                                                                                                                                                                                                                                                                                                                                                                                                                                                                                                                                                                                                                                                                                                                                                                                                                                                                                                                                                                                                                                                                                                                                                                                                                                                                                                                                                                                                                                                    |
|---------------------------------|------------------------------------------------------------------------------------------------------------------------------------------------------------------------------------------------------------------------------------------------------------------------------------------------------------------------------------------------------------------------------------------------------------------------------------------------------------------------------------------------------------------------------------------------------------------------------------------------------------------------------------------------------------------------------------------------------------------------------------------------------------------------------------------------------------------------------------------------------------------------------------------------------------------------------------------------------------------------------------------------------------------------------------------------------------------------------------------------------------------------------------------------------------------------------------------------------------------------------------------------------------------------------------------------------------------------------------------------------------------------------------------------------------------------------------------------------------------------------------------------------------------------------------------------------------------------------------------------------------------------------------------------------------------------------------------------------------------------------------|
| Journal:                        | <i>BMJ Open</i>                                                                                                                                                                                                                                                                                                                                                                                                                                                                                                                                                                                                                                                                                                                                                                                                                                                                                                                                                                                                                                                                                                                                                                                                                                                                                                                                                                                                                                                                                                                                                                                                                                                                                                                    |
| Manuscript ID                   | bmjopen-2021-050804.R1                                                                                                                                                                                                                                                                                                                                                                                                                                                                                                                                                                                                                                                                                                                                                                                                                                                                                                                                                                                                                                                                                                                                                                                                                                                                                                                                                                                                                                                                                                                                                                                                                                                                                                             |
| Article Type:                   | Original research                                                                                                                                                                                                                                                                                                                                                                                                                                                                                                                                                                                                                                                                                                                                                                                                                                                                                                                                                                                                                                                                                                                                                                                                                                                                                                                                                                                                                                                                                                                                                                                                                                                                                                                  |
| Date Submitted by the Author:   | 30-Aug-2021                                                                                                                                                                                                                                                                                                                                                                                                                                                                                                                                                                                                                                                                                                                                                                                                                                                                                                                                                                                                                                                                                                                                                                                                                                                                                                                                                                                                                                                                                                                                                                                                                                                                                                                        |
| Complete List of Authors:       | Ramallo-Fariña , Yolanda; Fundación Canaria de Investigación y Salud; Red de Investigación en Servicios de Salud en Enfermedades Crónicas, Rivero-Santana, Amado ; Fundación Canaria de Investigación y Salud; Red de Investigación en Servicios de Salud en Enfermedades Crónicas García-Pérez, Lidia; Fundación Canaria de Investigación y Salud; Red de Investigación en Servicios de Salud en Enfermedades Crónicas García-Bello, Miguel Angel; Fundación Canaria de Investigación y Salud Wägner, Ana Maria; Insular University Hospital of Gran Canaria, Department of Endocrinology and Nutrition; University of Las Palmas de Gran Canaria, University Institute for Biomedical and Health Research (IUIBS) Gonzalez-Pacheco, Himar; Fundación Canaria de Investigación y Salud Rodríguez-Rodríguez, Leticia; Fundación Canaria de Investigación y Salud Kaiser-Girardot , Sybille; Servicio de Evaluacion y Planificacion del Servicio Canario de la Salud Monzón-Monzón, Guillermo; Servicio de Evaluacion y Planificacion del Servicio Canario de la Salud Guerra-Marrero, Carolina; Servicio de Evaluacion y Planificacion del Servicio Canario de la Salud Daranas-Aguilar, Carmen; Servicio de Evaluacion y Planificacion del Servicio Canario de la Salud Roldán-Ruano, Margarita; Servicio de Evaluacion y Planificacion del Servicio Canario de la Salud Carmona, Montserrat; Instituto de Salud Carlos III, Unidad de Investigación en Telemedicina y e-Salud; Instituto de Salud Carlos III, Unidad de Investigación en Telemedicina y e-Salud Serrano-Aguilar, Pedro; Red de Investigación en Servicios de Salud en Enfermedades Crónicas; Red de Investigación en Servicios de Salud en Enfermedades Crónicas |
| <b>Primary Subject Heading</b>: | Diabetes and endocrinology                                                                                                                                                                                                                                                                                                                                                                                                                                                                                                                                                                                                                                                                                                                                                                                                                                                                                                                                                                                                                                                                                                                                                                                                                                                                                                                                                                                                                                                                                                                                                                                                                                                                                                         |
| Secondary Subject Heading:      | Evidence based practice, General practice / Family practice, Health informatics, Patient-centred medicine                                                                                                                                                                                                                                                                                                                                                                                                                                                                                                                                                                                                                                                                                                                                                                                                                                                                                                                                                                                                                                                                                                                                                                                                                                                                                                                                                                                                                                                                                                                                                                                                                          |
| Keywords:                       | PRIMARY CARE, DIABETES & ENDOCRINOLOGY, Quality in health care <                                                                                                                                                                                                                                                                                                                                                                                                                                                                                                                                                                                                                                                                                                                                                                                                                                                                                                                                                                                                                                                                                                                                                                                                                                                                                                                                                                                                                                                                                                                                                                                                                                                                   |

1  
2  
3  
4  
5  
6  
7  
8  
9  
10  
11  
12  
13  
14  
15  
16  
17  
18  
19  
20  
21  
22  
23  
24  
25  
26  
27  
28  
29  
30  
31  
32  
33  
34  
35  
36  
37  
38  
39  
40  
41  
42  
43  
44  
45  
46  
47  
48  
49  
50  
51  
52  
53  
54  
55  
56  
57  
58  
59  
60

|  |                                                                                                  |
|--|--------------------------------------------------------------------------------------------------|
|  | HEALTH SERVICES ADMINISTRATION & MANAGEMENT, Health informatics < BIOTECHNOLOGY & BIOINFORMATICS |
|  |                                                                                                  |

SCHOLARONE™  
Manuscripts



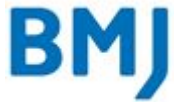

I, the Submitting Author has the right to grant and does grant on behalf of all authors of the Work (as defined in the below author licence), an exclusive licence and/or a non-exclusive licence for contributions from authors who are: i) UK Crown employees; ii) where BMJ has agreed a CC-BY licence shall apply, and/or iii) in accordance with the terms applicable for US Federal Government officers or employees acting as part of their official duties; on a worldwide, perpetual, irrevocable, royalty-free basis to BMJ Publishing Group Ltd ("BMJ") its licensees and where the relevant Journal is co-owned by BMJ to the co-owners of the Journal, to publish the Work in this journal and any other BMJ products and to exploit all rights, as set out in our [licence](#).

The Submitting Author accepts and understands that any supply made under these terms is made by BMJ to the Submitting Author unless you are acting as an employee on behalf of your employer or a postgraduate student of an affiliated institution which is paying any applicable article publishing charge ("APC") for Open Access articles. Where the Submitting Author wishes to make the Work available on an Open Access basis (and intends to pay the relevant APC), the terms of reuse of such Open Access shall be governed by a Creative Commons licence – details of these licences and which [Creative Commons](#) licence will apply to this Work are set out in our licence referred to above.

Other than as permitted in any relevant BMJ Author's Self Archiving Policies, I confirm this Work has not been accepted for publication elsewhere, is not being considered for publication elsewhere and does not duplicate material already published. I confirm all authors consent to publication of this Work and authorise the granting of this licence.

**TITLE PAGE****Patient-reported outcome measures for knowledge transfer and behavior modification interventions in type 2 diabetes. The INDICA study: a multi-arm cluster randomized controlled trial****Authors**

Ramallo-Fariña Y<sup>1,2</sup>, Rivero-Santana A<sup>1,2</sup>, García-Pérez L<sup>1,2</sup>, García-Bello MA<sup>1</sup>, Wägner AM<sup>3,4</sup>, González-Pacheco H<sup>1</sup>, Rodríguez-Rodríguez L<sup>1</sup>, Kaiser-Girardot S<sup>5</sup>, Monzón G<sup>5</sup>, Guerra Marrero C<sup>5</sup>, Daranas-Aguilar C<sup>5</sup>, Roldán-Ruano M<sup>5</sup>, Carmona M<sup>2,6</sup>, Serrano-Aguilar P<sup>2,5</sup>, INDICA Team

1 Canary Islands Health Research Institute Foundation (FIISC), Tenerife, Spain

2 Research Network on Health Services in Chronic Diseases (REDISSEC), Madrid, Spain

3 Department of Endocrinology and Nutrition, Insular University Hospital, Las Palmas de Gran Canaria, Spain

4 University Institute for Biomedical and Health Research (UIBS), University of Las Palmas de Gran Canaria (ULPG), Las Palmas de Gran Canaria, Spain

5 Evaluation Unit (SESCS), Canary Islands Health Service (SCS), Tenerife, Spain

6 Health Technology Assessment Agency, Instituto de Salud Carlos III, Madrid, Spain

**Corresponding author**

Yolanda Ramallo Fariña, ([yramfar@sescs.es](mailto:yramfar@sescs.es))

Camino Candelaria, 44. C.S. San Isidro-El Chorrillo  
38109 El Rosario. Tenerife. Spain

**Word count:** 4.704

## ABSTRACT

### Objective

This study assesses the effectiveness of different interventions of knowledge transfer and behavior modification to improve type 2 diabetes mellitus (T2DM) patients' reported outcomes measures (PROMs) in the long-term.

### Methods

The INDICA study is an open, community-based pragmatic, multicenter, controlled trial with random allocation by clusters to usual care (UC) or to one of the three interventions. The intervention for patients (PTI) included an educational group program, logs and a web-based platform for monitoring, and automated SMS. The intervention for professionals (PFI) included an educational program, a decision support tool embedded into the electronic clinical record, and periodic feedback about patients' results. A third group received both PTI and PFI (combined intervention, CBI). A total of 2,334 uncomplicated T2DM patients and 211 healthcare professionals were included of 32 Primary Care Centers in Canary Islands (Spain). The measurements included cognitive-attitudinal, behavioral, affective and health related quality of life (HQoL) variables. Mixed models were performed.

### Results

Compared to UC at 24 months, the PTI group significantly improved knowledge ( $P=0.005$ ), self-empowerment ( $P=0.002$ ), adherence to dietary recommendations ( $P<0.001$ ), and distress ( $P=0.01$ ). The PFI group improved at 24 months in distress ( $P=0.03$ ) and at 12 months there were improvements in depression ( $P=0.003$ ), anxiety ( $P=0.05$ ), HQoL ( $P=0.005$ ), and self-empowerment ( $P<0.001$ ). The CBI group improved at 24 months in self-empowerment ( $P=0.008$ ) and adherence to dietary recommendations ( $P=0.004$ ) and at 12 months in knowledge ( $P=0.008$ ), depression ( $P=0.006$ ), anxiety ( $P=0.003$ ), distress ( $P=0.01$ ), HQoL ( $P<0.001$ ), and neuropathic symptoms ( $P=0.02$ ). Statistically significant improvements were also observed at 24 months in the proportion of patients who quit smoking for PTI and CBI (41.5% in PTI and 42.3% in CBI vs. 21.2% in the UC group).

### Conclusions

Assessed interventions to improve PROMs in T2DM attain effectiveness for knowledge, self-empowerment, distress, diet adherence, and tobacco cessation. PTI produced the most lasting benefits.

1  
2  
3 **Trial Registration:** ClinicalTrials.gov NCT01657227 (August 6, 2012)  
4 <https://clinicaltrials.gov/ct2/show/NCT01657227>  
5  
6

7 **Keywords:** Primary Care, Diabetes & Endocrinology, Quality in health Care, Health  
8 Informatics  
9

### 10 11 **Strengths and Limitation of this study** 12

- 13  
14 - The INDICA study provides randomized evidence on the effectiveness of complex  
15 interventions to improve outcomes in type 2 diabetes mellitus patients, with a longer  
16 follow up than previous studies.  
17
- 18  
19 - All relevant stakeholders in the community are involved in the INDICA study  
20 (patients and family caregivers and primary care professionals).  
21
- 22  
23 - The trial included a large sample of patients with type 2 diabetes regardless of their  
24 baseline HbA1c level, reinforcing the external validity of the results.  
25
- 26  
27 - The INDICA interventions with ICT-based components favor applicability and access,  
28 in a cost-effective manner, to a growing number of patients.  
29
- 30  
31 - A limitation in the use of PROMs is the absence of well-established empirically  
32 derived minimum clinically significant differences  
33  
34  
35  
36  
37  
38  
39  
40  
41  
42  
43  
44  
45  
46  
47  
48  
49  
50  
51  
52  
53  
54  
55  
56  
57  
58  
59  
60

## INTRODUCTION

Many type 2 diabetes mellitus (T2DM) patients do not achieve the recommended treatment goals for glycaemic control[1]. This might be due to inappropriate health care access and/or clinical management. Moreover, psychological and emotional aspects, such as knowledge of the disease or diabetes-related distress, are also important issues for an appropriate self-management and glycaemic control[2, 3]. Previous research has shown the value of patient-reported outcome measure (PROMs) to monitor these variables in diabetes[4], which contribute to patient empowerment and patient-centered care[5]. PROMs are generally assessed with standardized, validated questionnaires aimed to measure patients' perception of their health status, perceived level of impairment, disability or health-related quality of life[6].

Interventions that aim to empower people with chronic illnesses and specifically diabetes have included distinct strategies such as educational programs, websites, support phone calls, text messages and other technological resources[4, 7-10], in order to improve patients' diabetes knowledge, self-management, psychological outcomes and health status. However, the results obtained have been mixed, with a considerable number of studies showing no effect of the interventions[8-11]. The INDICA study is a pragmatic, cluster-randomized controlled trial with two years follow-up that assesses the effectiveness and cost-effectiveness of multicomponent interventions for knowledge transfer and behavior modification of T2DM patients, their families, and healthcare professionals (physicians and nurses) in a large number of Primary Care Health Practices (PHCP). These interventions combine conventional group educational and training activities with different information and communication technology (ICT)-based interventions to guide the decisions of the main actors involved in the management of T2DM[12]. The intervention for patients (PTI) included an educational group program led by trained nurses, consisting of eight face-to-face sessions (one every three months over two years); continuous self-monitoring by means of logs and a web-based platform; and tailored automated SMS to provide continuous support to patients and to reinforce self-care and lifestyle changes. The intervention for professionals (PFI) included an educational program to update their diabetes knowledge, a decision support tool embedded into the electronic clinical record with recommendations based on best

1  
2  
3 available scientific knowledge, adapted to the specific needs of every patient, and periodic  
4 feedback about patients' results.  
5  
6

7 The results on the effectiveness of these interventions on clinical outcomes can be seen  
8 in Ramallo-Fariña et al.[13], and the cost-effectiveness evaluation can be reviewed in  
9 García-Pérez et al.[14]. The aim of this article is to report the effect of the INDICA  
10 interventions on a set of PROMs assessed in the trial: cognitive-attitudinal (knowledge,  
11 empowerment), behavioral (adherence to the dietary recommendation, medication and  
12 tobacco use), affective (anxiety, depression, distress) and health-related quality of life  
13 dimensions. These outcomes are commonly targeted for most diabetes interventions  
14 because of their association with critical, longer-term outcomes, such as functional  
15 capacity[15], complications[16-18], mortality[19], healthcare costs[20], and quality of  
16 life[21].  
17  
18  
19  
20  
21  
22  
23  
24  
25  
26  
27  
28  
29  
30  
31  
32  
33  
34  
35  
36  
37  
38  
39  
40  
41  
42  
43  
44  
45  
46  
47  
48  
49  
50  
51  
52  
53  
54  
55  
56  
57  
58  
59  
60

## METHODS

### Trial design

The INDICA study is an open, community-based pragmatic, multicenter, controlled trial with random allocation by clusters to usual care or one of three multicomponent interventions of knowledge transfer and behavior modification. One intervention was aimed at patient and family members (PTI); another intervention was aimed at primary care healthcare professionals (physicians and nurses) (PFI) and the third intervention combined the other two (CBI). In the control group, both patients/families and physicians/nurses received the usual activities provided by the PHCP. The full study protocol has been published before[12].

### Study Participants

The INDICA study included adults aged 18 to 65 years who had been diagnosed with T2DM at least one year before, did not have any diabetes-related complications, and used a mobile phone regularly[12]. Family Care Units (FCU) in each PCHP, comprised of a family physician and a nurse, were the recruitment unit. All PHCPs included had to have at least eight FCUs and the availability of appropriate facilities to provide educational group sessions. FCUs planning or awaiting placement changes among PHCP in the first six months after the project began were excluded.

### Setting and recruitment

PHCPs were randomly selected in the islands of Tenerife, Gran Canaria, Lanzarote, and La Palma (Canary Islands, Spain). Moreover, FCUs were randomly selected from all consenting FCUs at each PHCP. The electronic clinical records (ECR) of all potentially eligible patients in selected FCUs were screened to verify inclusion and exclusion criteria.

### Patient and public involvement

Patients were actively involved in the design of the trial. Two associations of patients with T2DM in the Canary Island were included from the beginning of the study as part of the research team, with an active participation in the design of the interventions and selection of the outcomes measured. In the same way, primary care professionals and clinical management staff participated in the elaboration of the protocol. The patients and

professionals included in the study could express their satisfaction with the interventions through a questionnaire, as well as through focus groups and in-depth interviews that will be the objective of another publication. Finally, we established a commitment with patients and healthcare professionals to share the results with them in an easy-to-understand way.

### **Random assignment**

Randomization was applied at different levels. First, three different strata were created according to the geographic areas in the more populated islands (Tenerife and Gran Canaria). Second, four PHCP (clusters) were randomly allocated to every geographic stratum and block permutation was used to assign PHCPs to the study arms; the PHCP being the sampling unit. La Palma and Lanzarote (less populated islands) were geographically divided into four zones with only one eligible PHCP available in each zone randomly assigned to one of the study arms. In every island, all arms were equally distributed. Six FCUs were randomly selected, from all those consenting to participate in each PHCP. From all patients fulfilling inclusion criteria and consenting to participate in each PHCP, 15 were randomly selected per FCU. Exceptionally, more than six FCUs or more than 15 patients per FCU were selected, to try to recruit 90 patients in every PHCP. However, it was not possible to attain this objective of 90 patients in all PHCP as there were insufficient patients in all FCU selected that complied with the inclusion and exclusion criteria.

FCU and patient randomization were performed by simple generation from a list of random numbers.

### **Interventions**

#### *Patient interventions*

Patients recruited to the PTI and CBI groups received a complex intervention of knowledge transfer and behavior modification, informed by conceptual frameworks of behavioral change[16]. The intervention combined: A) an eight-session, conventional, group educational program given by a nurse specialized in diabetes; B) monitoring of physical activity, diet, drug adherence, mood, blood pressure, and blood glucose readings by daily use of paper workbooks, complemented by weekly access to a website platform



1  
2  
3 to upload paper workbook data; and C) continuous, personalized feedback by semi-  
4 automated mobile phone messages (SMS), modified according to the website  
5 information.  
6  
7

### 8 9 *Interventions for primary care professionals*

10  
11  
12 Primary care professionals recruited to the PFI and CBI groups received a complex  
13 intervention of knowledge transfer and decision support, informed by the determinants of  
14 behavior change suggested by Michie et al.[22] for its design and implementation. The  
15 intervention included: A) an educational and interactive group program of two sessions  
16 to update clinical management information and promote patient-centered care; B) an  
17 automated decision aid tool, based on a CPG for T2DM embedded into the electronic  
18 clinical record; and C) monthly computerized graphic feedback, which displayed a set of  
19 processes and outcome indicators for all T2DM patients of the corresponding FCU  
20 compared to other FCU in their setting and the FCU with the best results. Both  
21 interventions were applied during the two years follow-up.  
22  
23  
24  
25  
26  
27  
28

### 29 30 **Duration of fieldwork**

31  
32  
33 Fieldwork took place between February 2013 and October 2016. The first year and the  
34 following two years were devoted to recruitment of patients and healthcare providers, and  
35 intervention and follow-up, respectively. As interventions were maintained over time,  
36 intervention and follow-up periods overlapped.  
37  
38  
39

### 40 41 **Outcomes**

#### 42 43 *Cognitive-attitudinal outcomes*

44  
45  
46 To assess potential changes in patient knowledge about T2DM and its self-management,  
47 we developed a specific instrument created in the context of this project, named DIATEK,  
48 which consisted of 30 questions. Each item has four response options and only one correct  
49 answer. Items examined risk factors for disease development and deterioration, objective  
50 values for biochemical parameters; recommendations on nutrition, physical activity, drug  
51 use and self-management. The total score, obtained by adding all correct responses, and  
52 ranging from 0 to 30, was later rescaled from 0 to 10.  
53  
54  
55  
56  
57  
58  
59  
60

1  
2  
3 The Diabetes Empowerment Scale-Short Form (DES-SF)[23] is a validated questionnaire  
4 designed to evaluate psychosocial self-efficacy in diabetes. DES-SF is the short form of  
5 the original DES, which includes eight items (need for change, developing a plan,  
6 overcoming barriers, asking for support, supporting oneself, coping with emotion,  
7 motivating oneself, and making diabetes care choices appropriate for one's priorities and  
8 circumstances) with responses on a five-point Likert scale and an overall range from eight  
9 to 40, according to increasing patient empowerment.

#### 16 *Behavioral outcomes*

17  
18  
19 The Mediterranean Diet Adherence Screener (MEDAS)[24] is a validated questionnaire  
20 to assess dietary recommendation adherence, which consists of 14 targets for food  
21 consumption, rated with one point for each target attained. According to the final score,  
22 patients are classified as having low (0-6 points), moderate (7-10) or high adherence (11-  
23 14 points) to the Mediterranean diet.

24  
25  
26 The Morisky Medication Adherence Scale (MGLS)[25] assesses drug-treatment  
27 adherence, by means of a validated four-item self-report instrument and a final score  
28 ranging from 0 to 4. Patients are considered adherent, only if they obtain four points.

29  
30  
31 Smoking status was monitored from baseline and during follow-up, to check for potential  
32 cessation throughout the study.

#### 37 *Affective outcomes*

38  
39  
40  
41 The State Trait Anxiety Inventory (STAI-S)[26] is a validated patient-reporting  
42 questionnaire that includes two non-dependent scales; the applied state-anxiety scale  
43 (STAI State) and the trait-anxiety scale (STAI Trait). It assesses transient emotional state  
44 or condition as characterized by subjective feelings of tension and apprehension that can  
45 fluctuate in time and intensity. The STAI-S includes 20 items, with each item scored on  
46 a four-point Likert scale. Anxiety is defined by a cut-off point  $\geq 30$ .

47  
48  
49 The Beck Depression Inventory II (BDI-II)[27] consists of 21 items scored on a four-  
50 point scale from 0 ("not at all") to 3 ("most of the time"). The items assess depression  
51 symptoms in the last two weeks. All item scores are added to a maximum score of 63. A  
52 BDI-II score of  $\geq 14$  indicates mild depressive symptoms.

1  
2  
3 The Diabetes Distress Scale (DDS2)[28] is a validated two-item diabetes distress-  
4 screening instrument that asks respondents to rate, on a six-point scale, the degree of  
5 distress caused by the two following items: (1) feeling overwhelmed by the demands of  
6 living with diabetes and (2) feeling that I am often failing with my diabetes regimen. High  
7 Diabetes distress can be identified by an average score  $\geq 3$  or more, low distress by scores  
8 under two, and moderate distress by the scores in between.  
9

#### 14 *Health-related quality of life and symptoms*

16  
17 The Audit of Diabetes-Dependent Quality of life (ADDQoL-19)[29] is a specific HRQoL  
18 questionnaire for diabetes. It assesses 19 domains, each with its impact and importance  
19 index to provide an integrated score for each domain. The sum of the score in each domain  
20 forms the global score (range: -9 to 3). The lower the score, the worse the quality of life.  
21

22  
23 The Michigan Neuropathy Screening Instrument (MNSI)[30] is an instrument that  
24 measures the incidence of distal diabetic peripheral polyneuropathy. It is composed of 15  
25 self-administered items, in which the abnormal responses are added. A score of seven or  
26 more is considered abnormal.  
27  
28  
29  
30

#### 32 *Satisfaction*

33 An ad-hoc self-completed questionnaire (INDICA-SATP) was developed to measure  
34 satisfaction with each component of the interventions in PTI and CBI groups. It was  
35 measured in the 24-month follow-up in patients who, having attended the group  
36 educational program, also used the web platform or received the semi-automated mobile  
37 phone messages. Satisfaction with each component was valued from 0 to 10 points, with  
38 10 reflecting maximum satisfaction.  
39  
40  
41  
42  
43

44 All information, including demographic data, overall and personal health history, diabetes  
45 health status, current medications, smoking status, and risk factors for complications, was  
46 obtained in a face to face interview at baseline and at 3, 6, 12, 18 and 24 months of follow-  
47 up. Similarly, all self-administered questionnaires (ADDQoL-19, BDI-II, DES-SF,  
48 DDS2, DIATEK, MEDAS, STAI-S, MGLS and MNSI), were distributed and collected  
49 at baseline, and at 12 and 24 months follow-up. ADDQoL-19, MEDAS and MGLS were  
50 also applied at 6 and 18 months.  
51  
52  
53  
54  
55

56  
57 Two other questionnaires were included in the trial registry and the published  
58 protocol[12], the *International Physical Activity Questionnaire* (IPAQ) and a scale  
59  
60

1  
2  
3 developed for this project to assess patients' attitudinal changes regarding lifestyles  
4 (INDICA-LSQ). However, the data quality checking identified many inconsistent or  
5 meaningless responses to these questionnaires, which indicates that patients did not  
6 correctly understand the instructions. Therefore, we decided to exclude them from the  
7 analyses.  
8  
9

### 10 11 12 **Statistical Analysis**

13  
14  
15 Multilevel mixed models including the baseline value of dependent variables and time  
16 elapsed since diagnosis (in years) as covariates were implemented for all PROMs. First  
17 level variables are those corresponding to each measurement along follow-up (repeated  
18 time measurements). The second level includes patient variables (the baseline value of  
19 dependent variables and time elapsed since diagnosis) and third level variables  
20 correspond to PHCP in which patients are grouped (the variable arm to which PHCP was  
21 assigned is included in this level). The effect that identifies the intervention arm has been  
22 considered fixed for the different PHCP, whilst the intercept has been considered random.  
23 The model also included an interaction term between arm and month, which allows for  
24 differences in the intervention effect between follow-up assessments[31]. The intraclass  
25 correlation coefficient (ICC) was obtained for each model for the PHCP and by patient  
26 according to their PHCP. The adjusted estimated mean was calculated for each follow up  
27 moment compared to baseline; and its statistical significance was calculated by means of  
28 the model already set out. The relative improvement for each follow-up was obtained as  
29 the ratio between the adjusted difference in mean between the intervention and control  
30 group and the mean of the control group.  
31  
32

33  
34  
35 A logistic regression model was implemented to compare the proportion of patients who  
36 quit smoking at each follow-up, by intervention arm. Only basal smokers were included  
37 in the analysis.  
38  
39

40  
41  
42  
43  
44  
45  
46  
47  
48  
49  
50  
51  
52  
53  
54  
55  
56  
57  
58  
59  
60  
61  
62  
63  
64  
65  
66  
67  
68  
69  
70  
71  
72  
73  
74  
75  
76  
77  
78  
79  
80  
81  
82  
83  
84  
85  
86  
87  
88  
89  
90  
91  
92  
93  
94  
95  
96  
97  
98  
99  
100  
101  
102  
103  
104  
105  
106  
107  
108  
109  
110  
111  
112  
113  
114  
115  
116  
117  
118  
119  
120  
121  
122  
123  
124  
125  
126  
127  
128  
129  
130  
131  
132  
133  
134  
135  
136  
137  
138  
139  
140  
141  
142  
143  
144  
145  
146  
147  
148  
149  
150  
151  
152  
153  
154  
155  
156  
157  
158  
159  
160  
161  
162  
163  
164  
165  
166  
167  
168  
169  
170  
171  
172  
173  
174  
175  
176  
177  
178  
179  
180  
181  
182  
183  
184  
185  
186  
187  
188  
189  
190  
191  
192  
193  
194  
195  
196  
197  
198  
199  
200  
201  
202  
203  
204  
205  
206  
207  
208  
209  
210  
211  
212  
213  
214  
215  
216  
217  
218  
219  
220  
221  
222  
223  
224  
225  
226  
227  
228  
229  
230  
231  
232  
233  
234  
235  
236  
237  
238  
239  
240  
241  
242  
243  
244  
245  
246  
247  
248  
249  
250  
251  
252  
253  
254  
255  
256  
257  
258  
259  
260  
261  
262  
263  
264  
265  
266  
267  
268  
269  
270  
271  
272  
273  
274  
275  
276  
277  
278  
279  
280  
281  
282  
283  
284  
285  
286  
287  
288  
289  
290  
291  
292  
293  
294  
295  
296  
297  
298  
299  
300  
301  
302  
303  
304  
305  
306  
307  
308  
309  
310  
311  
312  
313  
314  
315  
316  
317  
318  
319  
320  
321  
322  
323  
324  
325  
326  
327  
328  
329  
330  
331  
332  
333  
334  
335  
336  
337  
338  
339  
340  
341  
342  
343  
344  
345  
346  
347  
348  
349  
350  
351  
352  
353  
354  
355  
356  
357  
358  
359  
360  
361  
362  
363  
364  
365  
366  
367  
368  
369  
370  
371  
372  
373  
374  
375  
376  
377  
378  
379  
380  
381  
382  
383  
384  
385  
386  
387  
388  
389  
390  
391  
392  
393  
394  
395  
396  
397  
398  
399  
400  
401  
402  
403  
404  
405  
406  
407  
408  
409  
410  
411  
412  
413  
414  
415  
416  
417  
418  
419  
420  
421  
422  
423  
424  
425  
426  
427  
428  
429  
430  
431  
432  
433  
434  
435  
436  
437  
438  
439  
440  
441  
442  
443  
444  
445  
446  
447  
448  
449  
450  
451  
452  
453  
454  
455  
456  
457  
458  
459  
460  
461  
462  
463  
464  
465  
466  
467  
468  
469  
470  
471  
472  
473  
474  
475  
476  
477  
478  
479  
480  
481  
482  
483  
484  
485  
486  
487  
488  
489  
490  
491  
492  
493  
494  
495  
496  
497  
498  
499  
500  
501  
502  
503  
504  
505  
506  
507  
508  
509  
510  
511  
512  
513  
514  
515  
516  
517  
518  
519  
520  
521  
522  
523  
524  
525  
526  
527  
528  
529  
530  
531  
532  
533  
534  
535  
536  
537  
538  
539  
540  
541  
542  
543  
544  
545  
546  
547  
548  
549  
550  
551  
552  
553  
554  
555  
556  
557  
558  
559  
560  
561  
562  
563  
564  
565  
566  
567  
568  
569  
570  
571  
572  
573  
574  
575  
576  
577  
578  
579  
580  
581  
582  
583  
584  
585  
586  
587  
588  
589  
590  
591  
592  
593  
594  
595  
596  
597  
598  
599  
600  
601  
602  
603  
604  
605  
606  
607  
608  
609  
610  
611  
612  
613  
614  
615  
616  
617  
618  
619  
620  
621  
622  
623  
624  
625  
626  
627  
628  
629  
630  
631  
632  
633  
634  
635  
636  
637  
638  
639  
640  
641  
642  
643  
644  
645  
646  
647  
648  
649  
650  
651  
652  
653  
654  
655  
656  
657  
658  
659  
660  
661  
662  
663  
664  
665  
666  
667  
668  
669  
670  
671  
672  
673  
674  
675  
676  
677  
678  
679  
680  
681  
682  
683  
684  
685  
686  
687  
688  
689  
690  
691  
692  
693  
694  
695  
696  
697  
698  
699  
700  
701  
702  
703  
704  
705  
706  
707  
708  
709  
710  
711  
712  
713  
714  
715  
716  
717  
718  
719  
720  
721  
722  
723  
724  
725  
726  
727  
728  
729  
730  
731  
732  
733  
734  
735  
736  
737  
738  
739  
740  
741  
742  
743  
744  
745  
746  
747  
748  
749  
750  
751  
752  
753  
754  
755  
756  
757  
758  
759  
760  
761  
762  
763  
764  
765  
766  
767  
768  
769  
770  
771  
772  
773  
774  
775  
776  
777  
778  
779  
780  
781  
782  
783  
784  
785  
786  
787  
788  
789  
790  
791  
792  
793  
794  
795  
796  
797  
798  
799  
800  
801  
802  
803  
804  
805  
806  
807  
808  
809  
810  
811  
812  
813  
814  
815  
816  
817  
818  
819  
820  
821  
822  
823  
824  
825  
826  
827  
828  
829  
830  
831  
832  
833  
834  
835  
836  
837  
838  
839  
840  
841  
842  
843  
844  
845  
846  
847  
848  
849  
850  
851  
852  
853  
854  
855  
856  
857  
858  
859  
860  
861  
862  
863  
864  
865  
866  
867  
868  
869  
870  
871  
872  
873  
874  
875  
876  
877  
878  
879  
880  
881  
882  
883  
884  
885  
886  
887  
888  
889  
890  
891  
892  
893  
894  
895  
896  
897  
898  
899  
900  
901  
902  
903  
904  
905  
906  
907  
908  
909  
910  
911  
912  
913  
914  
915  
916  
917  
918  
919  
920  
921  
922  
923  
924  
925  
926  
927  
928  
929  
930  
931  
932  
933  
934  
935  
936  
937  
938  
939  
940  
941  
942  
943  
944  
945  
946  
947  
948  
949  
950  
951  
952  
953  
954  
955  
956  
957  
958  
959  
960  
961  
962  
963  
964  
965  
966  
967  
968  
969  
970  
971  
972  
973  
974  
975  
976  
977  
978  
979  
980  
981  
982  
983  
984  
985  
986  
987  
988  
989  
990  
991  
992  
993  
994  
995  
996  
997  
998  
999  
1000

Analysis was performed on an intention-to-treat basis, that is, participants were analyzed in the group to which they were randomized. Missed values were treated by means of multiple imputation procedures[32], with results based on 100 imputed datasets (missed values from all follow up visits were imputed). Analysis under multiple imputation is valid for randomly missed data[33]. We compared the results of imputed and non-imputed data. All the analyses were conducted using STATA version 15.0[34]. Differences were considered statistically significant if  $P < 0.05$ .

### **Ethical approval and consent to participate**

All participants provided written informed consent. The scientific and ethics committees of both the University Hospital of Canarias (ID: 2012\_44) and the University Hospital Nuestra Señora de la Candelaria (ID: EPA-07/10) approved the study protocol. The study was performed in accordance with Good Clinical Practice standards, prevailing local regulatory requirements, and Declaration of Helsinki recommendations.

For peer review only

## RESULTS

### Study Participants

A total of 2334 patients and 211 healthcare professionals were included. Figure 1 shows the flowchart with cluster randomization of patients for each intervention, attendance at educational/training sessions of patients and professionals and the number of PROMs questionnaires received for each follow-up assessment. The patients' baseline characteristic according to the intervention assignment can be seen in Ramallo-Fariña et al.[13]. Mean age of the whole population was  $55.7 \pm 7.1$  years, with 51.9% women. Mean baseline HbA1c was 7.3%/56 mmol/mol. From baseline, 49.4% of patients started with HbA1c levels within the accepted therapeutic goal ( $\leq 7\%/53$  mmol/mol). There were no statistically significant differences among groups in terms of their baseline characteristics.

Intention-to-treat results, reported below, were very similar to those obtained with non-imputed data. Only three discrepancies were observed that will be discussed in the corresponding outcome section. Results at all time points are shown in Tables 1 (inter-group differences), 2 and 3 (intra-group changes).

#### *Cognitive-attitudinal outcomes*

Table 1 shows that the level of knowledge about diabetes is significantly higher for PTI ( $P=0.007$ ) and CBI ( $P=0.008$ ), compared with UC, at 12 months; and for PTI ( $P=0.005$ ) at 24 months.

Patient empowerment was significantly higher for PFI and CBI groups, compared to UC at 12 months ( $P<0.001$  for both comparisons). Analysis of non-imputed data led to a  $P$ -value of 0.05 for the difference between PTI and UC, favoring the former, at this time point. At 24 months, PTI and CBI also attained significantly higher scores than UC ( $P=0.002$  and  $P=0.008$ , respectively); while differences with PFI are marginally significant.

#### *Behavioral outcomes*

Table 1 shows that the PTI group is significantly more adherent to the diet recommendations, compared to UC, after 12 months of follow-up. There is a difference of 0.87 ( $P<0.001$ ) at 24 months. Adherence improves for CBI from 18 months, compared

1  
2  
3 to UC, with differences of 0.7 ( $P=0.004$ ) at 24 months. Adherence levels remain moderate  
4 for all patient groups throughout follow-up (see Table 2).  
5  
6

7 No differences were found in medication adherence, compared to UC (Table 1). However,  
8 average levels of medication adherence were significantly improved in all four groups,  
9 despite the high baseline levels ( $>3$ ) (see Table 2).  
10  
11  
12

13 Table 4 shows the reduction in the proportion of smokers who quit smoking during follow  
14 up in PTI (12 months), and CBI (18 months), compared to UC. With non-imputed data  
15 the reduction was statistically significant from month 6 for PTI ( $P=0.023$ ) and month 12  
16 for CBI ( $P=0.025$ ). The percentage of patients who quit smoking at 24 months was 41.5%  
17 for PTI ( $P=0.012$ ) and 42.3% ( $P=0.012$ ) for CBI, versus 21.2% for UC group. There were  
18 no statistically significant differences between groups in the baseline percentage of  
19 smokers ( $P=0.99$ ).  
20  
21  
22  
23  
24  
25

#### 26 *Affective outcomes*

27 Compared to UC, both PFI and CBI show statistically significant differences at 12 months  
28 for depression ( $P=0.003$  and  $P=0.006$ , respectively), and anxiety ( $P=0.05$  and  $P=0.003$ ,  
29 respectively) (Table 1). These differences disappear at 24 months because all groups of  
30 patients improved (Table 2).  
31  
32  
33

34 The diabetes distress score improved significantly compared to the UC group for CBI at  
35 12 months ( $P=0.01$ ) and for PTI and PFI at 24 months ( $P=0.01$  and  $P=0.03$ , respectively).  
36 The score remained marginally significant for CBI (Table 1). At baseline, all patient  
37 groups showed moderate distress, which decreased to a low level from 12 months, except  
38 for the UC group, which did so at 24 months (Table 2).  
39  
40  
41  
42  
43

#### 44 *Health-related quality of life and symptoms*

45 HRQoL significantly improved for all intervention groups, at 12 months, compared to  
46 UC; a difference only maintained for PTI at 18 months ( $P=0.02$ ) (Table 1).  
47  
48

49 Neuropathic symptom scores were significantly lower for the CBI group at 12 months  
50 ( $P=0.02$ ) compared to the UC group (the analysis of non-imputed data led to a non-  
51 significant result,  $P=0.12$ ). This difference disappeared at 24 months (Table 1). Mean  
52 baseline scores for all groups were under 4, considerably below the cut-off point of 7 for  
53 abnormal classification (Table 3).  
54  
55  
56  
57  
58  
59  
60

### *Satisfaction*

Table 5 shows the patients' satisfaction with the intervention received. While average scores were higher than 9/10, in all dimensions, for the group educational sessions, satisfaction with the web platform and SMS obtained scores above 8.

Table 6 shows a summary of the results at 12 and 24 months.

For all PROMs, ICC values were low in every PHCP. Variance homogeneity was verified and thus reflected a very small effect associated with PHCP for interventions and control groups (similar results among PHCP in every arm). The ICC at the patient level was broad, accounting for considerable variations among individuals.



## DISCUSSION

This article assesses the effect of interventions implemented by the INDICA study to improve T2DM outcomes on several health measures self-perceived by patients in the cognitive-attitudinal (knowledge, empowerment), behavioral (i.e., adherence to the dietary recommendations, medication and tobacco use), affective (anxiety, depression, distress) and health-related quality of life dimensions. The INDICA study is a pragmatic cluster-randomized study with two years follow up that assesses the effectiveness of multicomponent interventions for knowledge transfer and behavior modification of patients, families, and healthcare professionals (physicians and nurses) at the primary care level.

At one-year follow-up, the combined intervention lead to obtaining significant results in all outcomes except diet and medication adherence. Relative improvements compared to usual care ranged between 9.6% (knowledge) and 52.2% (HRQoL), with intermediate values for anxiety (26.1%) and depression (28.7%). Significant improvements in HRQoL were also obtained for the PTI and PFI groups, although of less intensity (24.8% and 31.7%, respectively). However, they showed different results in the remaining variables: the PTI group improved in terms of knowledge and behavioral outcomes (i.e., diet and smoking), while the PFI improved in regard to empowerment and depression, but obtained a significantly worse result than the UC group for diet adherence.

After two years of follow-up, there were no significant differences in HRQoL, anxiety or depression, mainly due to the improvement experienced by the UC group in these variables. The PTI group obtained the best overall results, with significant improvements in the cognitive (i.e., knowledge, empowerment), affective (i.e., diabetes distress) and behavioral (i.e., diet and tobacco) variables. The same significant results were obtained for the combined intervention, except for knowledge and distress. Finally, the PFI group outperformed usual care only for distress, and showed a significantly worse result in regard to knowledge. There were no statistically significant differences in medication adherence during all the follow-up, although a ceiling effect could have occurred, since all groups showed high scores at baseline.

Therefore, the best results were observed in both groups including patients (PTI and CBI), similar to the findings observed on clinical outcomes[13]. This is not

1  
2  
3 surprising, given the straightforward and continuous application of these patient  
4 interventions, and the high reported satisfaction levels with all the intervention  
5 components (educational sessions, web resources and SMS). Previous studies that  
6 combined education and training with support phone calls, assessing interventions aimed  
7 at empowering diabetes patients to improve self-care and outcomes, showed inconsistent  
8 results between clinical variables and PROMS[8, 9]. The use of one-way messages such  
9 as those used in INDICA, appears to significantly and consistently improve HbA1c levels,  
10 although with a small-to-moderate effect-size (-0.38%, 95%CI: -0.53; -0.23)[10]. In  
11 addition, continuous advances in smart mobile technology provide new possibilities for  
12 diabetes self-management, despite the fact that evidence on the effectiveness of these new  
13 functionalities remains scarce and uncertain[11, 35].

22  
23 Reduction in the number of smokers in interventions applied directly to patients (PTI and  
24 CBI) in regard to UC that remain significant at 24 months with percentages of  
25 approximately 42% which is 2.5 times the result obtained by the most extended  
26 pharmacologic intervention (replacement nicotine therapy). This is according to a meta-  
27 analysis published recently[36] which puts this reduction at 16.9% of the intervened  
28 group compared to 10.4% of the control group in studies with follow up varying from six  
29 to 24 months.

35  
36 The intervention effect on professionals raises questions. At one year of follow-up, the  
37 PFI and CBI groups obtained improvements in psychological variables not affected by  
38 the intervention targeted exclusively at patients (PTI) (i.e., empowerment, anxiety,  
39 depression). These findings could be interpreted as the lasting result of better shared  
40 decision-making/patient-centered care by professionals trained in this care model.  
41 However, the PTI group was the only group to show significant improvements in  
42 behavioral variables (diet adherence and tobacco consumption); while PFI obtained  
43 significantly worse results for diet adherence from the sixth month, and CBI did not show  
44 significant benefits for these two outcomes until 18 months. These negative findings from  
45 groups containing professionals are repeated after two years in the case of knowledge, a  
46 variable in which the CBI group did not obtain significant differences. This interpretation  
47 should be considered cautiously given the analysis limitations, since the differences  
48 between intervention groups have not been statistically contrasted. As a recent Cochrane  
49 review[37] reported, current evidence on the effect of interventions to promote shared  
50 decision making by healthcare professionals shows benefits when decision making is  
51  
52  
53  
54  
55  
56  
57  
58  
59  
60

1  
2  
3 assessed by external observers but not by patient's assessment; furthermore, no  
4 significant effects were observed in most patient-reported outcomes[37]. Given the  
5 paucity and limited quality of available studies, more focused research is needed to draw  
6 solid conclusions about the effect of interventions aimed at professionals, and the  
7 mechanisms by which these interventions translate into psychological, behavioral and  
8 health changes of patients.  
9

10 The assessment of clinical outcome measures in the INDICA study[13] for the total  
11 sample recruited regardless of Hb1Ac levels (only 50.6% of all participants had baseline  
12 HbA1c concentrations >7%, with a mean of 7.3%), showed an early and significant but  
13 temporary reduction in HbA1c for the PTI group, compared to UC, from 3 to 6 months.  
14 Even so, more than 30% of the intervened patients (PTI and CBI) attained statistically  
15 and clinically relevant reductions in HbA1c (>0.4%); significantly higher than UC at 12  
16 and 18 months.  
17

18 In the group of patients with baseline HbA1c greater than 7% (uncontrolled patients), the  
19 magnitude of the intervention effect on clinical outcomes was greater, especially in the  
20 PTI group compared to the UC group, with significant differences up to 18 months, and  
21 a significant area under the curve at 24 months for PTI compared to UC[13]. These results  
22 are supported by other studies that report greater intervention effects in patients with  
23 higher HbA1c levels[38, 39]. Longer-term reductions in blood pressure were also found  
24 in the two groups in which professionals were intervened, with smaller effects in the  
25 remaining clinical measures (lipid profile, body mass index, serum creatinine and  
26 glomerular filtration rate). Some of these results are more related to changes in medication  
27 than lifestyles. From a cost-effectiveness perspective, small differences were observed  
28 between groups after two years follow up. The PTI was more effective and less costly  
29 than CBI and PFI, in patients with HbA1c>7%[14]. This prompted the conclusion that  
30 interventions focused on patients with the highest needs would limit the impact on the  
31 health care sector budget.  
32

33 This study has several limitations. The high number of instruments and measurement  
34 times increase the risk of type 1 error, which explains the decision not to compare  
35 intervention groups with each other. Moreover, the use of PROMs makes it necessary to  
36 know the minimum clinically significant differences of every instrument used. This  
37 difference, however, has not been investigated for most of them, and there is currently no  
38 consensus on the appropriate method (distribution or anchor-based) and/or statistics (e.g.,  
39 absolute versus relative reduction)[40]. Furthermore, the use of PROMs implies by  
40  
41  
42  
43  
44  
45  
46  
47  
48  
49  
50  
51  
52  
53  
54  
55  
56  
57  
58  
59  
60

1  
2  
3 definition an unblind assessment of results, which is added to the impossibility of blinding  
4 the participants regarding the intervention. Finally, the INDICA study was not designed  
5 to test the efficacy of every single component of the interventions assessed (e.g., text  
6 messages vs. patient education vs web content). Despite these limitations, the INDICA  
7 study presents some distinctive characteristics from other published studies that assess  
8 the impact of interventions promoting empowerment, self-management and behavior  
9 modification to patients and professionals: 1) a robust design (pragmatic cluster-  
10 randomized controlled trial with a factorial design for intervention arms) with a long  
11 follow-up (two years); 2) incorporation of the different actors involved in disease  
12 management (patients and family caregivers and primary care professionals; 3) greater  
13 external validity by including patients regardless of their baseline HbA1c levels; 4)  
14 incorporation of ICT-based components to the intervention that favors applicability and  
15 access, in a cost-effective manner, to a growing number of patients; and 5) inclusion of a  
16 large sample size with 2334 patients and 211 healthcare professionals.

17  
18 In conclusion, all the interventions assessed improved patients HRQoL at one year of  
19 follow-up, with differences according to the intervention in the remaining PROMs  
20 examined. The intervention targeted exclusively at patients (PTI) significantly improved  
21 knowledge, empowerment, distress, dietary recommendation adherence and tobacco  
22 cessation, up to two years of follow-up. Although the clinical relevance of these effects  
23 is uncertain, except in the case of smoking cessation, these results are promising since  
24 they reflect improvements in all personal domains assessed (cognitive, attitudinal,  
25 affective, behavioral), which highlight the importance of behavioral factors to attain good  
26 health outcomes. The intervention on professionals improved affective variables at one  
27 year of follow-up, but showed virtually no effects at two years together with a negative  
28 effect on diet adherence and no effect on tobacco consumption, which emphasizes the  
29 need for more focused evaluative research on this type of intervention. For both target  
30 groups (patients and professionals), the use of ICT can be a major help to improve care  
31 access and continuity; as well as effectiveness and cost-effectiveness in T2DM self-  
32 management.

## 33 STATEMENTS

## 34 Acknowledgements

1  
2  
3 We thank Prof Clare Bradley and Health Psychology Research Limited (owners and  
4 source of the ADDQoL-19 questionnaire) for allowing the use of their questionnaire in  
5 the INDICA Study. We also thank Jason Willis-Lee for copyediting services during  
6 preparation of the final manuscript, and Thayli León Plasencia for her help in recruiting  
7 patients.  
8  
9  
10  
11  
12

#### 13 14 **Conflicts of interest/Competing interests**

15 The authors declare that they have no competing interest.  
16

#### 17 18 **Competing interests**

19 The authors declare that they have no competing interest.  
20

#### 21 22 **Availability of data and material**

23 The datasets generated and/or analyzed during the current study, including deidentified  
24 participant data are available from the corresponding author on reasonable request in the  
25 next 10 years. The study protocol is available at  
26 <https://implementationscience.biomedcentral.com/articles/10.1186/s13012-015-0233-1>  
27  
28  
29

#### 30 31 **Funding**

32 This work was supported by the Spanish Ministry of Economy, Industry and  
33 Competitiveness (Instituto de Salud Carlos III), grant number: ADE10/00032 and  
34 PI16/00769 co-funded by the European Regional Development Fund (ERDF) “A way to  
35 make Europe”. The funders did not participate in the study design; collection,  
36 management, analysis, and interpretation of data; writing of the report; and the decision  
37 to submit the report for publication.  
38  
39  
40  
41

#### 42 43 **Author Contributions**

44 YRF, LGP, LRR, AMW, MRR and PSA contributed to the study design. SKG, GM,  
45 CGM, CDA and MRR developed the contents and gave the educational sessions to  
46 patients. Also, SKG, GM, CGM, CDA and MRR recruited participants and collected data.  
47 YRF, MAGB and HGP contributed to the statistical analyses. YRF, ARS, LGP, AMW  
48 and PSA were part of the writing committee of the manuscript. All authors reviewed,  
49 commented on, and approved the final manuscript.  
50  
51  
52  
53

54 The INDICA team included the following members (alphabetical order): Abraham Pérez  
55 de la Rosa (Canary Islands Health Research Institute Foundation, FIISC), Alicia Pareja  
56 Ríos (University Hospital of Canary Island), Andrés Sifre Perello (Molina Orosa  
57 Hospital), Ángela Trinidad Gutiérrez Pérez (Primary Care of Gran Canaria), Antonio  
58  
59  
60

1  
2  
3 Cabrera de León (Ntra. Sra. de la Candelaria University Hospital), Antonio García  
4 Quintana (Dr. Negrín University Hospital), Armando Carrillo Domínguez (Insular  
5 University Hospital), Bernardo Eusebio Herrera Domínguez (General de La Palma  
6 Hospital), Carlos Sedeño Pérez (Primary Care of Tenerife), Carlos Ramírez Álamo  
7 (Primary Care of Gran Canaria), Cecilia Lobos Soto (Insular University Hospital),  
8 Cristina Padrón Pérez (Canary Islands Health Research Institute Foundation, FIISC),  
9 Dácil Alvarado Martel (Dr. Negrín University Hospital), Daniel Hernández Obregón (Dr.  
10 Negrín University Hospital), Dulce N. Hernández Correa (Primary Care of Gran Canaria),  
11 Elsa Espinosa Pozuelo (Diabetes Patient' association of Tenerife), Elsa Florido Mayor  
12 (Canary Islands Health Research Institute Foundation, FIISC), Engracia Pinilla  
13 Domínguez (Ntra. Sra. de la Candelaria University Hospital), Fátima Herrera García  
14 (University Hospital of Canary Island), Félix Bonilla Aguiar (Dr. José Molina Hospital),  
15 Francisco Cabrera López (Insular University Hospital), Gloria Guerra de la Torre  
16 (Primary Care of Gran Canaria), Gregorio Muelas Martín (Dr. Negrín University  
17 Hospital), Héctor de la Rosa Merino (Canary Islands Health Research Institute  
18 Foundation, FIISC), Ignacio García Puente (Dr. Negrín University Hospital), Ignacio  
19 Llorente Gómez de Segura (Ntra. Sra. de la Candelaria University Hospital), Isabel García  
20 Calcerrada (Ntra. Sra. de la Candelaria University Hospital), Jacqueline Álvarez Pérez  
21 (Canary Islands Health Research Institute Foundation, FIISC), Jorge Federico Aldunate  
22 Page (Insular University Hospital), Jose Antonio García Dopico (University Hospital of  
23 Canary Island), Juan Andrés Báez Hernández (Primary Care of La Palma), Juan José  
24 Pérez Valencia (Primary Care of Tenerife), Julia Charlotte Wiebe (Dr. Negrín University  
25 Hospital), Lilisbeth Perestelo Pérez (Evaluation Unit, SESCS, Canary Islands Health  
26 Service, SCS), Leopoldo Martín Martín (Hospital General de La Palma), Luis Morcillo  
27 Herrera (University Hospital of Canary Island), Marcos Estupiñán Ramírez (Canary  
28 Islands Health Service, SCS), María Inmaculada González Pérez (Ntra. Sra. de la  
29 Candelaria University Hospital), María Isabel Visuerte Morales (University Hospital of  
30 Canary Island), María Pino Afonso Medina (Dr. Negrín University Hospital), Marta  
31 Riaño Ruiz (Insular University Hospital), Marta Tejera Santana (Dr. Negrín University  
32 Hospital), Mauro Boronat (Insular University Hospital), Mercedes Lorenzo Medina (Dr.  
33 Negrín University Hospital), Miguel Juan Mora García (Primary Care of Gran Canaria),  
34 Nayra Pérez Delgado (Ntra. Sra. de la Candelaria University Hospital), Pablo Pedrianez  
35 Martín (Dr. Negrín University Hospital), Pedro de Pablos- Velasco (Dr. Negrín  
36 University Hospital), Pilar Peláez Alba (La Laguna University), Rafael Valcárcel

1  
2  
3 (Primary Care of Tenerife), Remedios Castro Sánchez (Primary Care of Gran Canaria),  
4 Rodrigo Abreu González (Ntra. Sra. de la Candelaria University Hospital), Rosa Borges  
5 Trujillo (Dr. Negrín University Hospital), Víctor Lorenzo Sellarés (University Hospital  
6 of Canary Island).  
7  
8  
9  
10  
11  
12  
13  
14  
15  
16  
17  
18  
19  
20  
21  
22  
23  
24  
25  
26  
27  
28  
29  
30  
31  
32  
33  
34  
35  
36  
37  
38  
39  
40  
41  
42  
43  
44  
45  
46  
47  
48  
49  
50  
51  
52  
53  
54  
55  
56  
57  
58  
59  
60

For peer review only

## REFERENCES

1. Renders CM, Valk GD, Griffin SJ, et al. Interventions to improve the management of diabetes in primary care, outpatient, and community settings: a systematic review. *Diabetes Care* 2001;24:1821-1833. doi:10.2337/diacare.24.10.1821. PMID: 11574449.
2. Al Sayah F, Majumdar SR, Williams B, et al. Health literacy and health outcomes in diabetes: a systematic review. *J Gen Intern Med* 2013;28:444-52. doi: 10.1007/s11606-012-2241-z. PMID: 23065575.
3. Pouwer F, Nefs G, Nouwen A. Adverse effects of depression on glycemic control and health outcomes in people with diabetes: a review. *Endocrinol Metab Clin North Am* 2013;42:529-544. doi: 10.1016/j.ecl.2013.05.002. PMID: 24011885.
4. Peyrot M, Rubin RR, Lauritzen T, et al. Patient and provider perceptions of care for diabetes: results of the cross-national DAWN Study. *Diabetologia* 2006;49:279-88. doi: 10.1007/s00125-005-0048-8. PMID: 16397792.
5. Skovlund SE, Lichtenberg TH, Hessler D, et al. Can the Routine Use of Patient-Reported Outcome Measures Improve the Delivery of Person-Centered Diabetes Care? A Review of Recent Developments and a Case Study. *Curr Diab Rep* 2019;19:84. doi:10.1007/s11892-019-1190-x. PMID: 31420754.
6. Borg S, Eeg-Olofsson K, Palaszewski B, et al. Patient-reported outcome and experience measures for diabetes: development of scale models, differences between patient groups and relationships with cardiovascular and diabetes complication risk factors, in a combined registry and survey study in Sweden. *BMJ Open* 2019;9:e025033. doi:10.1136/bmjopen-2018-025033. PMID: 30612113.
7. Chen YC, Li IC. Effectiveness of interventions using empowerment concept for patients with chronic disease: a systematic review. *JB Libr Syst Rev* 2009;7:1179-1233. doi: 10.11124/01938924-200907270-00001. PMID: 27819885.
8. Aquino JA, Baldoni NR, Flôr CR, et al. Effectiveness of individual strategies for the empowerment of patients with diabetes mellitus: A systematic review with meta-analysis. *Prim Care Diabetes* 2018;12:97-110. doi:10.1016/j.pcd.2017.10.004. PMID: 29162491.
9. Baldoni NR, Aquino JA, Sanches-Giraud C, et al. Collective empowerment strategies for patients with Diabetes Mellitus: A systematic review and meta-analysis. *Prim Care Diabetes* 2017;11:201-211. doi:10.1016/j.pcd.2016.09.006. PMID: 27780683.
10. Haider R, Sudini L, Chow CK, et al. Mobile phone text messaging in improving glycaemic control for patients with type 2 diabetes mellitus: A systematic review and meta-analysis. *Diabetes Res Clin Pract* 2019;150:27-37. doi:10.1016/j.diabres.2019.02.022. PMID: 30822496.
11. Hou C, Xu Q, Diao S, et al. Mobile phone applications and self-management of diabetes: A systematic review with meta-analysis, meta-regression of 21 randomized trials and GRADE. *Diabetes Obes Metab* 2018;20:2009-2013. doi:10.1111/dom.13307. PMID: 29582538.



12. Ramallo-Fariña Y, García-Pérez L, Castilla-Rodríguez I, et al. Effectiveness and cost-effectiveness of knowledge transfer and behavior modification interventions in type 2 diabetes mellitus patients--the INDICA study: a cluster randomized controlled trial. *Implement Sci* 2015;10:47. doi:10.1186/s13012-015-0233-1. PMID: 25880498.
13. Ramallo-Fariña Y, García-Bello MA, García-Pérez L, et al. Effectiveness of Internet-Based Multicomponent Interventions for Patients and Health Care Professionals to Improve Clinical Outcomes in Type 2 Diabetes Evaluated Through the INDICA Study: Multiarm Cluster Randomized Controlled Trial. *JMIR Mhealth Uhealth* 2020;8:e18922. doi:10.2196/18922. PMID: 33136059.
14. García-Pérez L, Ramallo-Fariña Y, Vallejo-Torres L, et al. Cost-effectiveness of multicomponent interventions in type 2 diabetes mellitus in a cluster randomized controlled trial: the INDICA Study. *Primary Care Diabetes*.
15. De Rekeneire N, Resnick HE, Schwartz AV, et al. Diabetes is associated with subclinical functional limitation in nondisabled older individuals: the Health, Aging, and Body Composition study. *Diabetes Care* 2003;26:3257-3263. doi:10.2337/diacare.26.12.3257. PMID: 14633811.
16. Selvin E, Coresh J, Golden SH, et al. Glycemic control and coronary heart disease risk in persons with and without diabetes: the atherosclerosis risk in communities study. *Arch Intern Med* 2005;165:1910-1916. doi:10.1001/archinte.165.16.1910. PMID: 16157837.
17. Diabetes Control and Complications Trial Research Group, Nathan DM, Genuth S, et al. The effect of intensive treatment of diabetes on the development and progression of long-term complications in insulin-dependent diabetes mellitus. *N Engl J Med* 1993;329:977-986. doi:10.1056/NEJM199309303291401. PMID: 8366922.
18. Intensive blood-glucose control with sulphonylureas or insulin compared with conventional treatment and risk of complications in patients with type 2 diabetes (UKPDS 33). UK Prospective Diabetes Study (UKPDS) Group [published correction appears in *Lancet* 1999 Aug 14;354:602]. *Lancet* 1998;352:837-853. doi: [https://doi.org/10.1016/S0140-6736\(98\)07019-6](https://doi.org/10.1016/S0140-6736(98)07019-6)
19. Katon WJ, Rutter C, Simon G, et al. The association of comorbid depression with mortality in patients with type 2 diabetes. *Diabetes Care* 2005;28:2668-2672. doi:10.2337/diacare.28.11.2668. PMID: 16249537.
20. Eastman RC, Javitt JC, Herman WH, et al. Model of complications of NIDDM. II. Analysis of the health benefits and cost-effectiveness of treating NIDDM with the goal of normoglycemia. *Diabetes Care* 1997;20:735-744. doi:10.2337/diacare.20.5.735. PMID: 9135935.
21. Goldney RD, Phillips PJ, Fisher LJ, et al. Diabetes, depression, and quality of life: a population study. *Diabetes Care* 2004;27:1066-1070. doi:10.2337/diacare.27.5.1066. PMID: 15111522.
22. Michie S, Johnston M, Francis J, et al. From theory to intervention: mapping theoretically derived behavioural determinants to behaviour change techniques. *Appl Psychol* 2008;57:660-680. <https://doi.org/10.1111/j.1464-0597.2008.00341.x>

- 1
  - 2
  - 3
  - 4
  - 5
  - 6
  - 7
  - 8
  - 9
  - 10
  - 11
  - 12
  - 13
  - 14
  - 15
  - 16
  - 17
  - 18
  - 19
  - 20
  - 21
  - 22
  - 23
  - 24
  - 25
  - 26
  - 27
  - 28
  - 29
  - 30
  - 31
  - 32
  - 33
  - 34
  - 35
  - 36
  - 37
  - 38
  - 39
  - 40
  - 41
  - 42
  - 43
  - 44
  - 45
  - 46
  - 47
  - 48
  - 49
  - 50
  - 51
  - 52
  - 53
  - 54
  - 55
  - 56
  - 57
  - 58
  - 59
  - 60
23. Anderson RM, Fitzgerald JT, Gruppen LD, et al. The Diabetes Empowerment Scale-Short Form (DES-SF). *Diabetes Care* 2003;26:1641-1642. doi:10.2337/diacare.26.5.1641-a. PMID: 12716841.
24. Martínez-González MA, García-Arellano A, Toledo E, et al. A 14-item Mediterranean diet assessment tool and obesity indexes among high-risk subjects: the PREDIMED trial. *PLoS One* 2012;7:e43134. doi:10.1371/journal.pone.0043134. PMID: 22905215.
25. Morisky DE, Green LW, Levine DM. Concurrent and predictive validity of a self-reported measure of medication adherence. *Med Care* 1986;24:67-74. doi:10.1097/00005650-198601000-00007. PMID: 3945130.
26. Spielberger CD, Gorsuch RL, Lushene R. *Manual del Cuestionario de Ansiedad Estado-Rasgo (STAI)*. Madrid: TEA Ediciones, 1982.
27. Beck AT, Ward CH, Mendelson M, et al. An inventory for measuring depression. *Arch Gen Psychiatry* 1961;4:561-571. doi:10.1001/archpsyc.1961.01710120031004. PMID: 13688369.
28. Fisher L, Glasgow RE, Mullan JT, et al. Development of a brief diabetes distress screening instrument. *Ann Fam Med* 2008;6:246-252. doi:10.1370/afm.842. PMID: 18474888.
29. Bradley C, Todd C, Gorton T, et al. The development of an individualized questionnaire measure of perceived impact of diabetes on quality of life: the ADDQoL. *Qual Life Res* 1999;8:79-91. doi:10.1023/a:1026485130100. PMID: 10457741.
30. Feldman EL, Stevens MJ, Thomas PK, et al. A practical two-step quantitative clinical and electrophysiological assessment for the diagnosis and staging of diabetic neuropathy. *Diabetes Care* 1994;17:1281-1289. doi:10.2337/diacare.17.11.1281. PMID: 7821168.
31. Finucane MM, Samet JH, Horton NJ. Translational methods in biostatistics: linear mixed effect regression models of alcohol consumption and HIV disease progression over time. *Epidemiol Perspect Innov* 2007;4:8. doi:10.1186/1742-5573-4-8. PMID: 17880699.
32. White IR, Royston P, Wood AM. Multiple imputation using chained equations: Issues and guidance for practice. *Stat Med* 2011;30:377-399. doi:10.1002/sim.4067. PMID: 21225900.
33. Enders CK. *Applied Missing Data Analysis*. New York, NY, The Guilford Press, 2010. ISBN: 9781606236390
34. StataCorp. 2017. *Stata Statistical Software: Release 15*. College Station, TX: StataCorp LLC.
35. Wu Y, Yao X, Vespasiani G, et al. Correction: Mobile App-Based Interventions to Support Diabetes Self-Management: A Systematic Review of Randomized Controlled Trials to Identify Functions Associated with Glycemic Efficacy. *JMIR Mhealth Uhealth* 2018;6:e20. doi: 10.2196/mhealth.8789. PMID: 29334479.

- 1  
2  
3 36. Hartmann-Boyce J, Chepkin SC, Ye W, et al. Nicotine replacement therapy versus  
4 control for smoking cessation. *Cochrane Database Syst Rev* 2018;5:CD000146.  
5 doi:10.1002/14651858.CD000146.pub5. PMID: 29852054.  
6  
7 37. Légaré F, Adekpedjou R, Stacey D, et al. Interventions for increasing the use of  
8 shared decision making by healthcare professionals. *Cochrane Database Syst Rev*  
9 2018;7:CD006732. doi:10.1002/14651858.CD006732.pub4. PMID: 30025154.  
10  
11 38. Medical Advisory Secretariat. Behavioural interventions for type 2 diabetes: an  
12 evidence-based analysis. *Ont Health Technol Assess Ser* 2009;9:1-45. PMID:  
13 23074526.  
14  
15 39. Peters RM, Lui M, Patel K, et al. Improving Glycemic Control With a Standardized  
16 Text-Message and Phone-Based Intervention: A Community Implementation. *JMIR*  
17 *Diabetes* 2017;2:e15. doi:10.2196/diabetes.7910. PMID: 30291063.  
18  
19 40. Masson SC, Tejani AM. Minimum clinically important differences identified for  
20 commonly used depression rating scales. *J Clin Epidemiol* 2013;66:805-807.  
21 doi:10.1016/j.jclinepi.2013.01.010. PMID: 23618794.  
22  
23  
24  
25  
26  
27  
28  
29  
30  
31  
32  
33  
34  
35  
36  
37  
38  
39  
40  
41  
42  
43  
44  
45  
46  
47  
48  
49  
50  
51  
52  
53  
54  
55  
56  
57  
58  
59  
60

Table 1. Adjusted difference in the mean of each group compared to the control group

|                                                                                                          | 6 Months               | P value     | 12 Months              | P value          | 18 Months             | P value          | 24 Months              | P value          |
|----------------------------------------------------------------------------------------------------------|------------------------|-------------|------------------------|------------------|-----------------------|------------------|------------------------|------------------|
| <b>Cognitive-attitudinal outcomes</b>                                                                    |                        |             |                        |                  |                       |                  |                        |                  |
| <b>Knowledge (DIATEK):</b> F=47.3 P<0.001; ICC PHCP =0.06; ICC subject PHCP=0.35                         |                        |             |                        |                  |                       |                  |                        |                  |
| PTI                                                                                                      | -                      | -           | 0.64 (0.17 to 1.11)    | <b>0.007</b>     | -                     | -                | 0.65 (0.2 to 1.11)     | <b>0.005</b>     |
| PFI                                                                                                      | -                      | -           | -0.38 (-0.85 to 0.09)  | 0.11             | -                     | -                | -0.6 (-1.06 to -0.14)  | <b>0.01</b>      |
| CBI                                                                                                      | -                      | -           | 0.63 (0.16 to 1.11)    | <b>0.008</b>     | -                     | -                | 0.34 (-0.12 to 0.8)    | 0.15             |
| <b>Empowerment (DES-SF):</b> F=17.3 P<0.001; ICC PHCP =0.08; ICC; subject PHCP=0.08                      |                        |             |                        |                  |                       |                  |                        |                  |
| PTI                                                                                                      | -                      | -           | 1.58 (-0.59 to 3.75)   | 0.15             | -                     | -                | 3.04 (1.08 to 4.99)    | <b>0.002</b>     |
| PFI                                                                                                      | -                      | -           | 3.95 (1.9 to 6)        | <b>&lt;0.001</b> | -                     | -                | 1.84 (-0.11 to 3.79)   | 0.07             |
| CBI                                                                                                      | -                      | -           | 3.97 (1.9 to 6.04)     | <b>&lt;0.001</b> | -                     | -                | 2.63 (0.68 to 4.58)    | <b>0.008</b>     |
| <b>Behavioral outcomes</b>                                                                               |                        |             |                        |                  |                       |                  |                        |                  |
| <b>Adherence dietary recommendations (MEDAS):</b> F=25.0 P<0.001; ICC PHCP = 0.03; ICC subject PHCP=0.20 |                        |             |                        |                  |                       |                  |                        |                  |
| PTI                                                                                                      | 0.22 (-0.25 to 0.69)   | 0.36        | 0.71 (0.17 to 1.24)    | <b>0.01</b>      | 0.93 (0.46 to 1.41)   | <b>&lt;0.001</b> | 0.87 (0.4 to 1.35)     | <b>&lt;0.001</b> |
| PFI                                                                                                      | -0.58 (-1.04 to -0.11) | <b>0.01</b> | -0.96 (-1.46 to -0.47) | <b>&lt;0.001</b> | 0.17 (-0.31 to 0.64)  | 0.49             | 0.03 (-0.44 to 0.5)    | 0.90             |
| CBI                                                                                                      | 0.44 (-0.03 to 0.91)   | 0.06        | 0.06 (-0.47 to 0.58)   | 0.83             | 0.88 (0.4 to 1.35)    | <b>&lt;0.001</b> | 0.7 (0.22 to 1.17)     | <b>0.004</b>     |
| <b>Medication adherence (MGLS):</b> F=14.4 P<0.001; ICC PHCP =0.04; ICC subject PHCP=0.20                |                        |             |                        |                  |                       |                  |                        |                  |
| PTI                                                                                                      | 0.09 (-0.11 to 0.3)    | 0.37        | 0.09 (-0.12 to 0.3)    | 0.39             | 0.13 (-0.09 to 0.34)  | 0.24             | 0.16 (-0.04 to 0.36)   | 0.12             |
| PFI                                                                                                      | 0.01 (-0.2 to 0.22)    | 0.90        | -0.13 (-0.34 to 0.08)  | 0.24             | -0.06 (-0.26 to 0.15) | 0.58             | 0.09 (-0.11 to 0.3)    | 0.39             |
| CBI                                                                                                      | 0.03 (-0.18 to 0.24)   | 0.77        | -0.19 (-0.41 to 0.03)  | 0.08             | 0 (-0.21 to 0.21)     | 0.98             | -0.1 (-0.31 to 0.11)   | 0.36             |
| <b>Affective outcomes</b>                                                                                |                        |             |                        |                  |                       |                  |                        |                  |
| <b>Depression (BDI-II):</b> F=53.6 P<0.001; ICC PHCP = 0.05; ICC subject PHCP=0.34                       |                        |             |                        |                  |                       |                  |                        |                  |
| PTI                                                                                                      | -                      | -           | -1.91 (-3.99 to 0.17)  | 0.07             | -                     | -                | -0.76 (-2.68 to 1.16)  | 0.44             |
| PFI                                                                                                      | -                      | -           | -2.99 (-4.99 to -1)    | <b>0.003</b>     | -                     | -                | 0.37 (-1.56 to 2.3)    | 0.71             |
| CBI                                                                                                      | -                      | -           | -3 (-5.13 to -0.87)    | <b>0.006</b>     | -                     | -                | 0.23 (-1.73 to 2.19)   | 0.82             |
| <b>Anxiety (STAI-S):</b> F=36.0 P<0.001; ICC PHCP =0.07 ICC; subject PHCP=0.32                           |                        |             |                        |                  |                       |                  |                        |                  |
| PTI                                                                                                      | -                      | -           | -2.25 (-5.75 to 1.25)  | 0.21             | -                     | -                | -2.18 (-5.54 to 1.18)  | 0.20             |
| PFI                                                                                                      | -                      | -           | -3.47 (-6.95 to 0.02)  | <b>0.05</b>      | -                     | -                | -0.39 (-3.78 to 2.99)  | 0.82             |
| CBI                                                                                                      | -                      | -           | -5.4 (-8.99 to -1.81)  | <b>0.003</b>     | -                     | -                | -0.50 (-3.9 to 2.9)    | 0.77             |
| <b>Distress (DDS2):</b> F=14.9 P<0.001; ICC PHCP =.05 ICC; subject PHCP=0.25                             |                        |             |                        |                  |                       |                  |                        |                  |
| PTI                                                                                                      | -                      | -           | -0.23 (-0.53 to 0.07)  | 0.13             | -                     | -                | -0.34 (-0.62 to -0.07) | <b>0.01</b>      |
| PFI                                                                                                      | -                      | -           | -0.24 (-0.53 to 0.05)  | 0.10             | -                     | -                | -0.31 (-0.58 to -0.04) | <b>0.03</b>      |

|                                                                                                           |                       |      |                        |                  |                       |             |                       |      |
|-----------------------------------------------------------------------------------------------------------|-----------------------|------|------------------------|------------------|-----------------------|-------------|-----------------------|------|
| CBI                                                                                                       | -                     | -    | -0.36 (-0.65 to -0.07) | <b>0.01</b>      | -                     | -           | -0.24 (-0.51 to 0.03) | 0.08 |
| <b>Health-related quality of life and symptoms</b>                                                        |                       |      |                        |                  |                       |             |                       |      |
| <b>Health-related quality of life (ADDQoL-19):</b> F=25.3 P<0.001; ICC PHCP = 0.04; ICC subject PHCP=0.34 |                       |      |                        |                  |                       |             |                       |      |
| PTI                                                                                                       | 0.09 (-0.24 to 0.42)  | 0.60 | 0.40 (0.04 to 0.76)    | <b>0.03</b>      | 0.39 (0.05 to 0.72)   | <b>0.02</b> | 0.16 (-0.17 to 0.48)  | 0.34 |
| PFI                                                                                                       | -0.09 (-0.42 to 0.23) | 0.56 | 0.51 (0.16 to 0.86)    | <b>0.005</b>     | -0.02 (-0.35 to 0.31) | 0.89        | -0.06 (-0.38 to 0.26) | 0.71 |
| CBI                                                                                                       | 0.03 (-0.3 to 0.35)   | 0.88 | 0.84 (0.49 to 1.18)    | <b>&lt;0.001</b> | 0.21 (-0.13 to 0.54)  | 0.23        | -0.05 (-0.38 to 0.28) | 0.77 |
| <b>Neuropathic symptom (MNSI):</b> F=59.8 P<0.001; ICC PHCP =0.02 ICC; subject PHCP=0.32                  |                       |      |                        |                  |                       |             |                       |      |
| PTI                                                                                                       | -                     | -    | -0.35 (-0.8 to 0.09)   | 0.12             | -                     | -           | -0.08 (-0.49 to 0.33) | 0.70 |
| PFI                                                                                                       | -                     | -    | -0.42 (-0.87 to 0.03)  | 0.07             | -                     | -           | 0.35 (-0.07 to 0.78)  | 0.11 |
| CBI                                                                                                       | -                     | -    | -0.57 (-1.04 to -0.1)  | <b>0.02</b>      | -                     | -           | 0.31 (-0.12 to 0.74)  | 0.16 |

The models were adjusted by the baseline value of dependent variables and time elapsed since diagnosis.

CBI, is a combined intervention for patients and professionals; ICC, Intraclass correlation coefficient; PFI, Intervention only for healthcare professionals at primary care; PTI, Intervention only for patients and family members; PHCP, Primary Care Health Practices.

Table 2. Adjusted means for each group and intragroup differences compared with the baseline measurement (cognitive-attitudinal, behavioral and affective outcomes)

|                                                  | Adjusted means in each group (95%CI) |                     |                        |                     |                        | Difference in intragroup of adjusted means compared to baseline (95%CI) |                  |                          |                  |                          |                  |                          |                  |
|--------------------------------------------------|--------------------------------------|---------------------|------------------------|---------------------|------------------------|-------------------------------------------------------------------------|------------------|--------------------------|------------------|--------------------------|------------------|--------------------------|------------------|
|                                                  | Baseline                             | 6 Months            | 12 Months              | 18 Months           | 24 Months              | B-6M                                                                    | P value          | B-12M                    | P value          | B-18M                    | P value          | B-24M                    | P value          |
| <b>Cognitive-attitudinal outcomes</b>            |                                      |                     |                        |                     |                        |                                                                         |                  |                          |                  |                          |                  |                          |                  |
| <b>Knowledge (DIATEK)</b>                        |                                      |                     |                        |                     |                        |                                                                         |                  |                          |                  |                          |                  |                          |                  |
| PTI                                              | 6.4<br>(6.3 to 6.5)                  | -                   | 7.2<br>(6.9 to 7.5)    | -                   | 7.4<br>(7.1 to 7.7)    | -                                                                       | -                | 0.82<br>(0.48 to 1.2)    | <b>&lt;0.001</b> | -                        | -                | 1.03<br>(0.71 to 1.36)   | <b>&lt;0.001</b> |
| PFI                                              | 6.5<br>(6.3 to 6.7)                  | -                   | 6.2<br>(5.8 to 6.5)    | -                   | 6.1<br>(5.8 to 6.5)    | -                                                                       | -                | -0.31<br>(-0.63 to 0.02) | 0.07             | -                        | -                | -0.32<br>(-0.64 to 0.01) | 0.058            |
| CBI                                              | 6.5<br>(6.4 to 6.6)                  | -                   | 7.2<br>(6.8 to 7.5)    | -                   | 7.1<br>(6.8 to 7.4)    | -                                                                       | -                | 0.7<br>(0.36 to 1.03)    | <b>&lt;0.001</b> | -                        | -                | 0.6<br>(0.27 to 0.94)    | <b>&lt;0.001</b> |
| UC                                               | 6.2<br>(6.1 to 6.3)                  | -                   | 6.5<br>(6.2 to 6.9)    | -                   | 6.7<br>(6.4 to 7.1)    | -                                                                       | -                | 0.3<br>(-0.04 to 0.63)   | <b>0.08</b>      | -                        | -                | 0.5<br>(0.18 to 0.82)    | <b>0.002</b>     |
| <b>Empowerment (DES-SF)</b>                      |                                      |                     |                        |                     |                        |                                                                         |                  |                          |                  |                          |                  |                          |                  |
| PTI                                              | 26.4<br>(25.8 to 27.0)               | -                   | 29.5<br>(27.9 to 31.0) | -                   | 33.5<br>(32.1 to 34.9) | -                                                                       | -                | 3.08<br>(1.6 to 4.6)     | <b>&lt;0.001</b> | -                        | -                | 7.1<br>(5.7 to 8.5)      | <b>&lt;0.001</b> |
| PFI                                              | 26.3<br>(25.2 to 27.4)               | -                   | 31.9<br>(30.5 to 33.2) | -                   | 32.3<br>(30.9 to 33.7) | -                                                                       | -                | 5.6<br>(4.2 to 6.9)      | <b>&lt;0.001</b> | -                        | -                | 6.02<br>(4.7 to 7.4)     | <b>&lt;0.001</b> |
| CBI                                              | 27.6<br>(27.0 to 28.3)               | -                   | 31.9<br>(30.4 to 33.3) | -                   | 33.1<br>(31.7 to 34.5) | -                                                                       | -                | 4.3<br>(2.8 to 5.7)      | <b>&lt;0.001</b> | -                        | -                | 5.7<br>(4.1 to 6.9)      | <b>&lt;0.001</b> |
| UC                                               | 26.1<br>(25.5 to 26.7)               | -                   | 27.9<br>(26.4 to 29.4) | -                   | 30.5<br>(29.1 to 31.8) | -                                                                       | -                | 1.8<br>(0.26 to 3.3)     | <b>0.02</b>      | -                        | -                | 4.3<br>(2.9 to 5.7)      | <b>&lt;0.001</b> |
| <b>Behavioral outcomes</b>                       |                                      |                     |                        |                     |                        |                                                                         |                  |                          |                  |                          |                  |                          |                  |
| <b>Adherence dietary recommendations (MEDAS)</b> |                                      |                     |                        |                     |                        |                                                                         |                  |                          |                  |                          |                  |                          |                  |
| PTI                                              | 8<br>(7.8 to 8.1)                    | 7.6<br>(7.2 to 7.9) | 9.1<br>(8.7 to 9.4)    | 8.3<br>(7.9 to 8.6) | 8.7<br>(8.3 to 9)      | -0.43<br>(-0.77 to -0.09)                                               | <b>0.01</b>      | 1.1<br>(0.71 to 1.5)     | <b>&lt;0.001</b> | 0.27<br>(-0.07 to 0.62)  | 0.12             | 0.68<br>(0.34 to 1.02)   | <b>&lt;0.001</b> |
| PFI                                              | 8.2<br>(7.9 to 8.5)                  | 6.8<br>(6.4 to 7.1) | 7.4<br>(7.1 to 7.7)    | 7.5<br>(7.1 to 7.8) | 7.8<br>(7.5 to 8.2)    | -1.5<br>(-1.8 to -1.1)                                                  | <b>&lt;0.001</b> | -0.82<br>(-1.2 to -0.49) | <b>&lt;0.001</b> | -0.82<br>(-1.2 to -0.49) | <b>&lt;0.001</b> | -0.4<br>(-0.74 to -0.07) | <b>0.018</b>     |
| CBI                                              | 8.3<br>(8.1 to 8.5)                  | 7.8<br>(7.4 to 8.1) | 8.4<br>(8.0 to 8.8)    | 8.2<br>(7.9 to 8.5) | 8.5<br>(8.1 to 8.8)    | -0.51<br>(-0.84 to -0.17)                                               | <b>0.003</b>     | 0.13<br>(-0.24 to 0.51)  | 0.49             | -0.08<br>(-0.43 to 0.26) | 0.63             | 0.2<br>(-0.14 to 0.54)   | 0.26             |
| UC                                               | 8.02<br>(7.9 to 8.2)                 | 7.3<br>(7.0 to 7.7) | 8.4<br>(8.0 to 8.7)    | 7.3<br>(7.0 to 7.7) | 7.8<br>(7.5 to 8.1)    | -0.69<br>(-1.0 to -0.36)                                                | <b>&lt;0.001</b> | 0.34<br>(-0.02 to 0.7)   | 0.07             | -0.7<br>(-1.0 to -0.37)  | <b>&lt;0.001</b> | -0.24<br>(-0.57 to 0.1)  | 0.16             |
| <b>Medication adherence (MGLS)</b>               |                                      |                     |                        |                     |                        |                                                                         |                  |                          |                  |                          |                  |                          |                  |
| PTI                                              | 3.1                                  | 3.5                 | 3.6                    | 3.6                 | 3.6                    | 0.41                                                                    | <b>&lt;0.001</b> | 0.45                     | <b>&lt;0.001</b> | 0.5                      | <b>&lt;0.001</b> | 0.48                     | <b>&lt;0.001</b> |

|                            |                        |                     |                        |                     |                        |                        |              |                           |                  |                        |                  |                           |                  |
|----------------------------|------------------------|---------------------|------------------------|---------------------|------------------------|------------------------|--------------|---------------------------|------------------|------------------------|------------------|---------------------------|------------------|
|                            | (3.1 to 3.2)           | (3.4 to 3.7)        | (3.4 to 3.7)           | (3.5 to 3.8)        | (3.5 to 3.7)           | (0.26 to 0.56)         |              | (0.29 to 0.6)             |                  | (0.35 to 0.65)         |                  | (0.33 to 0.62)            |                  |
| PFI                        | 3.3<br>(3.2 to 3.3)    | 3.5<br>(3.3 to 3.6) | 3.3<br>(3.2 to 3.5)    | 3.4<br>(3.3 to 3.6) | 3.5<br>(3.4 to 3.7)    | 0.18<br>(0.03 to 0.33) | <b>0.02</b>  | 0.08<br>(-0.07 to 0.22)   | 0.32             | 0.16<br>(0.02 to 0.31) | <b>0.026</b>     | 0.25<br>(0.11 to 0.4)     | <b>0.001</b>     |
| CBI                        | 3.3<br>(3.3 to 3.3)    | 3.5<br>(3.3 to 3.6) | 3.3<br>(3.1 to 3.4)    | 3.5<br>(3.3 to 3.6) | 3.3<br>(3.2 to 3.5)    | 0.17<br>(0.02 to 0.32) | <b>0.02</b>  | -0.01<br>(-0.18 to 0.15)  | 0.87             | 0.2<br>(0.05 to 0.35)  | <b>0.01</b>      | 0.04<br>(-0.11 to 0.2)    | 0.60             |
| UC                         | 3.2<br>(3.1 to 3.3)    | 3.4<br>(3.3 to 3.6) | 3.5<br>(3.3 to 3.6)    | 3.5<br>(3.3 to 3.6) | 3.4<br>(3.3 to 3.6)    | 0.23<br>(0.08 to 0.38) | <b>0.002</b> | 0.27<br>(0.12 to 0.42)    | <b>&lt;0.001</b> | 0.29<br>(0.14 to 0.43) | <b>&lt;0.001</b> | 0.23<br>(0.08 to 0.37)    | <b>0.002</b>     |
| <b>Affective outcomes</b>  |                        |                     |                        |                     |                        |                        |              |                           |                  |                        |                  |                           |                  |
| <b>Depression (BDI-II)</b> |                        |                     |                        |                     |                        |                        |              |                           |                  |                        |                  |                           |                  |
| PTI                        | 10.9<br>(10.4 to 11.5) | -                   | 8.5<br>(7.1 to 9.9)    | -                   | 6.1<br>(4.7 to 7.5)    | -                      | -            | -2.4<br>(-3.7 to -0.96)   | <b>0.001</b>     | -                      | -                | -4.9<br>(-6.2 to -3.5)    | <b>&lt;0.001</b> |
| PFI                        | 11.0<br>(9.9 to 12.1)  | -                   | 7.5<br>(6.1 to 8.8)    | -                   | 7.2<br>(5.8 to 8.6)    | -                      | -            | -3.6<br>(-4.9 to -2.2)    | <b>&lt;0.001</b> | -                      | -                | -3.8<br>(-5.2 to -2.4)    | <b>&lt;0.001</b> |
| CBI                        | 11.7<br>(10.9 to 12.4) | -                   | 7.5<br>(5.9 to 8.9)    | -                   | 7.1<br>(5.7 to 8.5)    | -                      | -            | -4.2<br>(-5.7 to -2.7)    | <b>&lt;0.001</b> | -                      | -                | -4.6<br>(-5.9 to -3.1)    | <b>&lt;0.001</b> |
| UC                         | 11.4<br>(10.9 to 11.9) | -                   | 10.5<br>(8.9 to 11.9)  | -                   | 6.7<br>(5.5 to 8.2)    | -                      | -            | -0.94<br>(-2.4 to 0.55)   | 0.22             | -                      | -                | -4.5<br>(-5.9 to -3.2)    | <b>&lt;0.001</b> |
| <b>Anxiety (STAI-S)</b>    |                        |                     |                        |                     |                        |                        |              |                           |                  |                        |                  |                           |                  |
| PTI                        | 21.5<br>(20.7 to 22.2) | -                   | 18.4<br>(15.9 to 20.9) | -                   | 14.5<br>(12.0 to 16.9) | -                      | -            | -3.0<br>(-5.5 to -0.55)   | <b>0.017</b>     | -                      | -                | -7<br>(-9.4 to -4.6)      | <b>&lt;0.001</b> |
| PFI                        | 20.6<br>(18.8 to 22.4) | -                   | 17.2<br>(14.8 to 19.6) | -                   | 16.2<br>(13.8 to 18.7) | -                      | -            | -3.4<br>(-5.8 to -1)      | <b>0.006</b>     | -                      | -                | -4.4<br>(-6.8 to -1.9)    | <b>&lt;0.001</b> |
| CBI                        | 23.2<br>(22.0 to 24.3) | -                   | 15.3<br>(12.8 to 17.8) | -                   | 16.1<br>(13.7 to 18.6) | -                      | -            | -7.9<br>(-10.4 to -5.4)   | <b>&lt;0.001</b> | -                      | -                | -7.0<br>(-9.5 to -4.6)    | <b>&lt;0.001</b> |
| UC                         | 21.9<br>(21.2 to 22.7) | -                   | 20.7<br>(18.1 to 23.2) | -                   | 16.6<br>(14.3 to 19.0) | -                      | -            | -1.3<br>(-3.8 to 1.3)     | 0.32             | -                      | -                | -5.3<br>(-7.7 to -2.9)    | <b>&lt;0.001</b> |
| <b>Distress (DDS2)</b>     |                        |                     |                        |                     |                        |                        |              |                           |                  |                        |                  |                           |                  |
| PTI                        | 2.8<br>(2.6 to 2.8)    | -                   | 1.9<br>(1.7 to 2.2)    | -                   | 1.6<br>(1.4 to 1.8)    | -                      | -            | -0.72<br>(-0.93 to -0.51) | <b>&lt;0.001</b> | -                      | -                | -1.1<br>(-1.2 to -0.86)   | <b>&lt;0.001</b> |
| PFI                        | 2.5<br>(2.3 to 2.6)    | -                   | 1.9<br>(1.8 to 2.1)    | -                   | 1.7<br>(1.5 to 1.9)    | -                      | -            | -0.5<br>(-0.7 to -0.31)   | <b>&lt;0.001</b> | -                      | -                | -0.79<br>(-0.98 to -0.6)  | <b>&lt;0.001</b> |
| CBI                        | 2.7<br>(2.6 to 2.8)    | -                   | 1.8<br>(1.6 to 2.0)    | -                   | 1.7<br>(1.5 to 1.9)    | -                      | -            | -0.91<br>(-1.1 to -0.71)  | <b>&lt;0.001</b> | -                      | -                | -1.01<br>(-1.2 to -0.82)  | <b>&lt;0.001</b> |
| UC                         | 2.6<br>(2.5 to 2.6)    | -                   | 2.1<br>(1.9 to 2.4)    | -                   | 1.97<br>(1.8 to 2.2)   | -                      | -            | -0.36<br>(-0.58 to -0.15) | <b>0.001</b>     | -                      | -                | -0.58<br>(-0.77 to -0.39) | <b>&lt;0.001</b> |

The models were adjusted by the baseline value of dependent variables and time elapsed since diagnosis.

B, baseline; CBI, is a combined intervention for patients and professionals; M, month; PFI, Intervention only for healthcare professionals at primary care; PTI, Intervention only for patients and family members; UC, usual care or control group.

Table 3. Adjusted means for each group and intragroup differences compared with the baseline measurement (health-related quality of life and symptoms)

|                                                    | Adjusted means in each group (95%CI) |                         |                          |                          |                           | Difference in intragroup of adjusted means compared to baseline (95%CI) |         |                           |         |                        |         |                           |         |
|----------------------------------------------------|--------------------------------------|-------------------------|--------------------------|--------------------------|---------------------------|-------------------------------------------------------------------------|---------|---------------------------|---------|------------------------|---------|---------------------------|---------|
|                                                    | Baseline                             | 6 Months                | 12 Months                | 18 Months                | 24 Months                 | B-6M                                                                    | P value | B-12M                     | P value | B-18M                  | P value | B-24M                     | P value |
| <b>Health-related quality of life and symptoms</b> |                                      |                         |                          |                          |                           |                                                                         |         |                           |         |                        |         |                           |         |
| <b>Health-related quality of life (ADDQoL-19)</b>  |                                      |                         |                          |                          |                           |                                                                         |         |                           |         |                        |         |                           |         |
| PTI                                                | -1.7<br>(-1.8 to -1.6)               | -1.0<br>(-1.3 to -0.8)  | -1.2<br>(-1.5 to -0.97)  | -0.85<br>(-1.1 to -0.61) | -0.76<br>(-0.99 to -0.53) | 0.69<br>(0.46 to 0.93)                                                  | <0.001  | 0.52<br>(0.27 to 0.76)    | <0.001  | 0.89<br>(0.65 to 1.1)  | <0.001  | 0.97<br>(0.74 to 1.2)     | <0.001  |
| PFI                                                | -1.7<br>(-1.8 to -1.5)               | -1.2<br>(-1.5 to -1)    | -1.1<br>(-1.3 to -0.88)  | -1.3<br>(-1.5 to -1.0)   | -0.98<br>(-1.2 to -0.75)  | 0.43<br>(0.21 to 0.66)                                                  | <0.001  | 0.55<br>(0.32 to 0.78)    | <0.001  | 0.4<br>(0.17 to 0.63)  | 0.001   | 0.68<br>(0.45 to 0.9)     | <0.001  |
| CBI                                                | -1.8<br>(-1.9 to -1.6)               | -1.1<br>(-1.3 to -0.87) | -0.78<br>(-1.0 to -0.54) | -1.0<br>(-1.3 to -0.79)  | -0.97<br>(-1.2 to -0.73)  | 0.65<br>(0.42 to 0.88)                                                  | <0.001  | 0.98<br>(0.74 to 1.2)     | <0.001  | 0.73<br>(0.49 to 0.96) | <0.001  | 0.78<br>(0.54 to 1.0)     | <0.001  |
| UC                                                 | -2.1<br>(-2.2 to -1.9)               | -1.1<br>(-1.4 to -0.9)  | -1.6<br>(-1.9 to -1.4)   | -1.2<br>(-1.5 to -1)     | -0.92<br>(-1.2 to -0.69)  | 0.92<br>(0.7 to 1.2)                                                    | <0.001  | 0.44<br>(0.18 to 0.7)     | 0.001   | 0.82<br>(0.59 to 1.1)  | <0.001  | 1.1<br>(0.9 to 1.4)       | <0.001  |
| <b>Neuropathic symptom (MNSI)</b>                  |                                      |                         |                          |                          |                           |                                                                         |         |                           |         |                        |         |                           |         |
| PTI                                                | 3.1<br>(3 to 3.2)                    | -                       | 2.8<br>(2.5 to 3.1)      | -                        | 2.4<br>(2.1 to 2.7)       | -                                                                       | -       | -0.29<br>(-0.61 to 0.02)  | 0.07    | -                      | -       | -0.69<br>(-0.99 to -0.4)  | <0.001  |
| PFI                                                | 3.3<br>(3.0 to 3.6)                  | -                       | 2.8<br>(2.5 to 3.1)      | -                        | 2.9<br>(2.5 to 3.2)       | -                                                                       | -       | -0.55<br>(-0.86 to -0.23) | 0.001   | -                      | -       | -0.45<br>(-0.76 to -0.13) | 0.005   |
| CBI                                                | 3.3<br>(3.1 to 3.4)                  | -                       | 2.6<br>(2.3 to 2.9)      | -                        | 2.8<br>(2.5 to 3.1)       | -                                                                       | -       | -0.67<br>(-1.0 to -0.31)  | <0.001  | -                      | -       | -0.46<br>(-0.78 to -0.13) | 0.006   |
| UC                                                 | 3.3<br>(3.2 to 3.5)                  | -                       | 3.1<br>(2.9 to 3.5)      | -                        | 2.5<br>(2.2 to 2.8)       | -                                                                       | -       | -0.15<br>(-0.47 to 0.17)  | 0.36    | -                      | -       | -0.82<br>(-1.1 to -0.54)  | <0.001  |

The models were adjusted by the baseline value of dependent variables and time elapsed since diagnosis.

B, baseline; CBI, is a combined intervention for patients and professionals; M, month; PFI, Intervention only for healthcare professionals at primary care; PTI, Intervention only for patients and family members; UC, usual care or control group



Table 4. Proportion of patients who stop smoking at each follow up compared to the control group

|                  | PTI (n=114) | PFI (n=156) | CBI (n=109) | UC (n=145) | <i>P</i> value global | <i>P</i> value<br>PTI vs UC | <i>P</i> value<br>PFI vs UC | <i>P</i> value<br>CBI vs UC |
|------------------|-------------|-------------|-------------|------------|-----------------------|-----------------------------|-----------------------------|-----------------------------|
| <b>3 Months</b>  | 12.8        | 8.7         | 15.4        | 10.4       | 0.54                  | 0.99                        | 0.99                        | 0.99                        |
| <b>6 Months</b>  | 28.5        | 7.5         | 24.2        | 15.4       | 0.003                 | 0.11                        | 0.22                        | 0.99                        |
| <b>12 Months</b> | 33.1        | 17.4        | 28.4        | 14.3       | 0.014                 | 0.018                       | 0.99                        | 0.11                        |
| <b>18 Months</b> | 36.7        | 19.6        | 37.6        | 18.8       | 0.004                 | 0.04                        | 0.99                        | 0.03                        |
| <b>24 Months</b> | 41.5        | 23.4        | 42.3        | 21.2       | 0.002                 | 0.012                       | 0.99                        | 0.012                       |

Only basal smokers are included in the analysis.

CBI, is a combined intervention for patients and professionals; PFI, Intervention only for healthcare professionals at primary care; PTI, Intervention only for patients and family members; UC, usual care or control group.

Table 5. Patient satisfaction with the intervention received (only those who made use of each intervention component)

|                                                          | n   | mean (95%CI)        |
|----------------------------------------------------------|-----|---------------------|
| <b>Conventional group educational program</b>            |     |                     |
| <i>Usability</i>                                         |     |                     |
| Environment generated                                    | 592 | 9.53 (9.46 to 9.60) |
| Exchange of experiences with participants and educator   | 588 | 9.59 (9.53 to 9.66) |
| Educator's work                                          | 587 | 9.79 (9.74 to 9.83) |
| Quality of materials                                     | 587 | 9.56 (9.49 to 9.64) |
| <i>Personal satisfaction</i>                             |     |                     |
| The sessions helped me get to know my diabetes better    | 591 | 9.67 (9.61 to 9.73) |
| I found the sessions useful                              | 593 | 9.60 (9.52 to 9.67) |
| The sessions motivated me to look after my health better | 590 | 9.62 (9.55 to 9.69) |
| <i>General</i>                                           |     |                     |
| General satisfaction                                     | 589 | 9.70 (9.65 to 9.76) |
| I would recommend the sessions                           | 588 | 9.77 (9.72 to 9.82) |
| <b>Website platform</b>                                  |     |                     |
| <i>Usability</i>                                         |     |                     |
| Access to the content                                    | 253 | 8.30 (8.02 to 8.58) |
| Usability of the web                                     | 251 | 8.59 (8.33 to 8.85) |
| Patient outcomes follow up charts                        | 215 | 8.37 (8.03 to 8.72) |
| Quality of materials                                     | 229 | 8.81 (8.53 to 9.08) |
| Access to videos of the sessions                         | 216 | 8.76 (8.47 to 9.05) |
| <i>General</i>                                           |     |                     |
| General satisfaction                                     | 237 | 8.56 (8.30 to 8.82) |
| I would recommend using the website                      | 239 | 8.81 (8.56 to 9.05) |
| <b>Semi-automated mobile phone messages</b>              |     |                     |
| <i>Usability</i>                                         |     |                     |
| Reading SMS                                              | 585 | 9.51 (9.41 to 9.61) |
| Usefulness of reminders                                  | 576 | 9.33 (9.22 to 9.45) |
| <i>Personal satisfaction</i>                             |     |                     |
| They adapt to my needs                                   | 579 | 9.04 (8.90 to 9.18) |
| They motivate me to look after myself                    | 576 | 9.15 (9.02 to 9.28) |
| I would like to continue receiving them                  | 552 | 8.80 (8.59 to 9.00) |
| <i>General</i>                                           |     |                     |
| General satisfaction                                     | 572 | 9.23 (9.09 to 9.37) |

Table 6. Significant differences compared to usual care for the three intervention groups.

|                              | PTI       |           | PFI       |           | CBI       |           |
|------------------------------|-----------|-----------|-----------|-----------|-----------|-----------|
|                              | 12 months | 24 months | 12 months | 24 months | 12 months | 24 months |
| <b>Cognitive/attitudinal</b> |           |           |           |           |           |           |
| Knowledge (DIATEK)           | **        | **        |           | ↓**       | **        |           |
| Empowerment (DES)            |           | **        | ***       |           | ***       | **        |
| <b>Behavioural</b>           |           |           |           |           |           |           |
| Diet (MEDAS)                 | **        | ***       | ↓***      |           |           | **        |
| Adherence (MGLS)             |           |           |           |           |           |           |
| Smoking                      | *         | *         |           |           | *         | *         |
| <b>Affective</b>             |           |           |           |           |           |           |
| Depression (BDI-II)          |           |           | **        |           | **        |           |
| Anxiety (STAI-S)             |           |           | *         |           | **        |           |
| Diabetes Distress (DDS2)     |           | **        |           | *         | **        |           |
| <b>HRQOL</b>                 |           |           |           |           |           |           |
| HRQoL (ADDQoL-19)            | *         |           | **        |           | ***       |           |
| Neuropathy (MNSI)            |           |           |           |           | *         |           |

↓ represent worsening compare to usual care.

\* $P \leq 0.05$ .

\*\* $P \leq 0.01$ .

\*\*\* $P \leq 0.001$ .

CBI, is a combined intervention for patients and professionals; PFI, Intervention only for healthcare professionals at primary care; PTI, Intervention only for patients and family members; UC, usual care or control group.





## CONSORT 2010 checklist of information to include when reporting a randomised trial\*

| Section/Topic                    | Item No | Checklist item                                                                                                                                                                              | Reported on page No        |
|----------------------------------|---------|---------------------------------------------------------------------------------------------------------------------------------------------------------------------------------------------|----------------------------|
| <b>Title and abstract</b>        |         |                                                                                                                                                                                             |                            |
|                                  | 1a      | Identification as a randomised trial in the title                                                                                                                                           | 1                          |
|                                  | 1b      | Structured summary of trial design, methods, results, and conclusions (for specific guidance see CONSORT for abstracts)                                                                     | 2                          |
| <b>Introduction</b>              |         |                                                                                                                                                                                             |                            |
| Background and objectives        | 2a      | Scientific background and explanation of rationale                                                                                                                                          | 4                          |
|                                  | 2b      | Specific objectives or hypotheses                                                                                                                                                           | 4-5                        |
| <b>Methods</b>                   |         |                                                                                                                                                                                             |                            |
| Trial design                     | 3a      | Description of trial design (such as parallel, factorial) including allocation ratio                                                                                                        | 6                          |
|                                  | 3b      | Important changes to methods after trial commencement (such as eligibility criteria), with reasons                                                                                          |                            |
| Participants                     | 4a      | Eligibility criteria for participants                                                                                                                                                       | 6                          |
|                                  | 4b      | Settings and locations where the data were collected                                                                                                                                        | 6                          |
| Interventions                    | 5       | The interventions for each group with sufficient details to allow replication, including how and when they were actually administered                                                       | 7-8                        |
| Outcomes                         | 6a      | Completely defined pre-specified primary and secondary outcome measures, including how and when they were assessed                                                                          | 8-9                        |
|                                  | 6b      | Any changes to trial outcomes after the trial commenced, with reasons                                                                                                                       | n.a.                       |
| Sample size                      | 7a      | How sample size was determined                                                                                                                                                              | See the published protocol |
|                                  | 7b      | When applicable, explanation of any interim analyses and stopping guidelines                                                                                                                | n.a.                       |
| <b>Randomisation:</b>            |         |                                                                                                                                                                                             |                            |
| Sequence generation              | 8a      | Method used to generate the random allocation sequence                                                                                                                                      | 7                          |
|                                  | 8b      | Type of randomisation; details of any restriction (such as blocking and block size)                                                                                                         | 7                          |
| Allocation concealment mechanism | 9       | Mechanism used to implement the random allocation sequence (such as sequentially numbered containers), describing any steps taken to conceal the sequence until interventions were assigned | 7                          |
| Implementation                   | 10      | Who generated the random allocation sequence, who enrolled participants, and who assigned participants to                                                                                   | 7                          |

|    |                                                      |     |                                                                                                                                                   |                                                   |
|----|------------------------------------------------------|-----|---------------------------------------------------------------------------------------------------------------------------------------------------|---------------------------------------------------|
| 1  |                                                      |     | interventions                                                                                                                                     |                                                   |
| 2  | Blinding                                             | 11a | If done, who was blinded after assignment to interventions (for example, participants, care providers, those assessing outcomes) and how          | n.a.                                              |
| 3  |                                                      |     |                                                                                                                                                   |                                                   |
| 4  |                                                      | 11b | If relevant, description of the similarity of interventions                                                                                       | n.a.                                              |
| 5  | Statistical methods                                  | 12a | Statistical methods used to compare groups for primary and secondary outcomes                                                                     | 10-11                                             |
| 6  |                                                      | 12b | Methods for additional analyses, such as subgroup analyses and adjusted analyses                                                                  | n.a.                                              |
| 7  |                                                      |     |                                                                                                                                                   |                                                   |
| 8  | <b>Results</b>                                       |     |                                                                                                                                                   |                                                   |
| 9  | Participant flow (a diagram is strongly recommended) | 13a | For each group, the numbers of participants who were randomly assigned, received intended treatment, and were analysed for the primary outcome    | Figure 1                                          |
| 10 |                                                      | 13b | For each group, losses and exclusions after randomisation, together with reasons                                                                  | Figure 1                                          |
| 11 | Recruitment                                          | 14a | Dates defining the periods of recruitment and follow-up                                                                                           | 8                                                 |
| 12 |                                                      | 14b | Why the trial ended or was stopped                                                                                                                | n.a.                                              |
| 13 | Baseline data                                        | 15  | A table showing baseline demographic and clinical characteristics for each group                                                                  | See the clinical outcomes paper published         |
| 14 |                                                      |     |                                                                                                                                                   |                                                   |
| 15 |                                                      |     |                                                                                                                                                   |                                                   |
| 16 | Numbers analysed                                     | 16  | For each group, number of participants (denominator) included in each analysis and whether the analysis was by original assigned groups           | Figure 1                                          |
| 17 | Outcomes and estimation                              | 17a | For each primary and secondary outcome, results for each group, and the estimated effect size and its precision (such as 95% confidence interval) | 12-13                                             |
| 18 |                                                      | 17b | For binary outcomes, presentation of both absolute and relative effect sizes is recommended                                                       |                                                   |
| 19 | Ancillary analyses                                   | 18  | Results of any other analyses performed, including subgroup analyses and adjusted analyses, distinguishing pre-specified from exploratory         |                                                   |
| 20 | Harms                                                | 19  | All important harms or unintended effects in each group (for specific guidance see CONSORT for harms)                                             |                                                   |
| 21 | <b>Discussion</b>                                    |     |                                                                                                                                                   |                                                   |
| 22 | Limitations                                          | 20  | Trial limitations, addressing sources of potential bias, imprecision, and, if relevant, multiplicity of analyses                                  | 16-17                                             |
| 23 | Generalisability                                     | 21  | Generalisability (external validity, applicability) of the trial findings                                                                         | 14-16                                             |
| 24 | Interpretation                                       | 22  | Interpretation consistent with results, balancing benefits and harms, and considering other relevant evidence                                     | 17                                                |
| 25 | <b>Other information</b>                             |     |                                                                                                                                                   |                                                   |
| 26 | Registration                                         | 23  | Registration number and name of trial registry                                                                                                    | 2                                                 |
| 27 | Protocol                                             | 24  | Where the full trial protocol can be accessed, if available                                                                                       | <a href="https://implement">https://implement</a> |

---

entationsci  
ce.biomedcen  
tral.com/articl  
es/10.1186/s1  
3012-015-  
0233-1

---

1  
2  
3  
4  
5  
6  
7  
8 **Funding**                    25    Sources of funding and other support (such as supply of drugs), role of funders

---

18

9  
10  
11 \*We strongly recommend reading this statement in conjunction with the CONSORT 2010 Explanation and Elaboration for important clarifications on all the items. If relevant, we also  
12 recommend reading CONSORT extensions for cluster randomised trials, non-inferiority and equivalence trials, non-pharmacological treatments, herbal interventions, and pragmatic trials.  
13 Additional extensions are forthcoming: for those and for up to date references relevant to this checklist, see [www.consort-statement.org](http://www.consort-statement.org).  
14  
15  
16  
17  
18  
19  
20  
21  
22  
23  
24  
25  
26  
27  
28  
29  
30  
31  
32  
33  
34  
35  
36  
37  
38  
39  
40  
41  
42

# BMJ Open

**Patient-reported outcome measures for knowledge transfer and behavior modification interventions in type 2 diabetes. The INDICA study: a multi-arm cluster randomized controlled trial**

|                                 |                                                                                                                                                                                                                                                                                                                                                                                                                                                                                                                                                                                                                                                                                                                                                                                                                                                                                                                                                                                                                                                                                                                                                                                                                                                                                                                                                                                                                                                                                                                                                                                                                                                                                                                                    |
|---------------------------------|------------------------------------------------------------------------------------------------------------------------------------------------------------------------------------------------------------------------------------------------------------------------------------------------------------------------------------------------------------------------------------------------------------------------------------------------------------------------------------------------------------------------------------------------------------------------------------------------------------------------------------------------------------------------------------------------------------------------------------------------------------------------------------------------------------------------------------------------------------------------------------------------------------------------------------------------------------------------------------------------------------------------------------------------------------------------------------------------------------------------------------------------------------------------------------------------------------------------------------------------------------------------------------------------------------------------------------------------------------------------------------------------------------------------------------------------------------------------------------------------------------------------------------------------------------------------------------------------------------------------------------------------------------------------------------------------------------------------------------|
| Journal:                        | <i>BMJ Open</i>                                                                                                                                                                                                                                                                                                                                                                                                                                                                                                                                                                                                                                                                                                                                                                                                                                                                                                                                                                                                                                                                                                                                                                                                                                                                                                                                                                                                                                                                                                                                                                                                                                                                                                                    |
| Manuscript ID                   | bmjopen-2021-050804.R2                                                                                                                                                                                                                                                                                                                                                                                                                                                                                                                                                                                                                                                                                                                                                                                                                                                                                                                                                                                                                                                                                                                                                                                                                                                                                                                                                                                                                                                                                                                                                                                                                                                                                                             |
| Article Type:                   | Original research                                                                                                                                                                                                                                                                                                                                                                                                                                                                                                                                                                                                                                                                                                                                                                                                                                                                                                                                                                                                                                                                                                                                                                                                                                                                                                                                                                                                                                                                                                                                                                                                                                                                                                                  |
| Date Submitted by the Author:   | 02-Nov-2021                                                                                                                                                                                                                                                                                                                                                                                                                                                                                                                                                                                                                                                                                                                                                                                                                                                                                                                                                                                                                                                                                                                                                                                                                                                                                                                                                                                                                                                                                                                                                                                                                                                                                                                        |
| Complete List of Authors:       | Ramallo-Fariña , Yolanda; Fundación Canaria de Investigación y Salud; Red de Investigación en Servicios de Salud en Enfermedades Crónicas, Rivero-Santana, Amado ; Fundación Canaria de Investigación y Salud; Red de Investigación en Servicios de Salud en Enfermedades Crónicas García-Pérez, Lidia; Fundación Canaria de Investigación y Salud; Red de Investigación en Servicios de Salud en Enfermedades Crónicas García-Bello, Miguel Angel; Fundación Canaria de Investigación y Salud Wägner, Ana Maria; Insular University Hospital of Gran Canaria, Department of Endocrinology and Nutrition; University of Las Palmas de Gran Canaria, University Institute for Biomedical and Health Research (IUIBS) Gonzalez-Pacheco, Himar; Fundación Canaria de Investigación y Salud Rodríguez-Rodríguez, Leticia; Fundación Canaria de Investigación y Salud Kaiser-Girardot , Sybille; Servicio de Evaluacion y Planificacion del Servicio Canario de la Salud Monzón-Monzón, Guillermo; Servicio de Evaluacion y Planificacion del Servicio Canario de la Salud Guerra-Marrero, Carolina; Servicio de Evaluacion y Planificacion del Servicio Canario de la Salud Daranas-Aguilar, Carmen; Servicio de Evaluacion y Planificacion del Servicio Canario de la Salud Roldán-Ruano, Margarita; Servicio de Evaluacion y Planificacion del Servicio Canario de la Salud Carmona, Montserrat; Instituto de Salud Carlos III, Unidad de Investigación en Telemedicina y e-Salud; Instituto de Salud Carlos III, Unidad de Investigación en Telemedicina y e-Salud Serrano-Aguilar, Pedro; Red de Investigación en Servicios de Salud en Enfermedades Crónicas; Red de Investigación en Servicios de Salud en Enfermedades Crónicas |
| <b>Primary Subject Heading</b>: | Diabetes and endocrinology                                                                                                                                                                                                                                                                                                                                                                                                                                                                                                                                                                                                                                                                                                                                                                                                                                                                                                                                                                                                                                                                                                                                                                                                                                                                                                                                                                                                                                                                                                                                                                                                                                                                                                         |
| Secondary Subject Heading:      | Evidence based practice, General practice / Family practice, Health informatics, Patient-centred medicine                                                                                                                                                                                                                                                                                                                                                                                                                                                                                                                                                                                                                                                                                                                                                                                                                                                                                                                                                                                                                                                                                                                                                                                                                                                                                                                                                                                                                                                                                                                                                                                                                          |
| Keywords:                       | PRIMARY CARE, DIABETES & ENDOCRINOLOGY, Quality in health care <                                                                                                                                                                                                                                                                                                                                                                                                                                                                                                                                                                                                                                                                                                                                                                                                                                                                                                                                                                                                                                                                                                                                                                                                                                                                                                                                                                                                                                                                                                                                                                                                                                                                   |



1  
2  
3  
4  
5  
6  
7  
8  
9  
10  
11  
12  
13  
14  
15  
16  
17  
18  
19  
20  
21  
22  
23  
24  
25  
26  
27  
28  
29  
30  
31  
32  
33  
34  
35  
36  
37  
38  
39  
40  
41  
42  
43  
44  
45  
46  
47  
48  
49  
50  
51  
52  
53  
54  
55  
56  
57  
58  
59  
60

|  |                                                                                                  |
|--|--------------------------------------------------------------------------------------------------|
|  | HEALTH SERVICES ADMINISTRATION & MANAGEMENT, Health informatics < BIOTECHNOLOGY & BIOINFORMATICS |
|  |                                                                                                  |

SCHOLARONE™  
Manuscripts



I, the Submitting Author has the right to grant and does grant on behalf of all authors of the Work (as defined in the below author licence), an exclusive licence and/or a non-exclusive licence for contributions from authors who are: i) UK Crown employees; ii) where BMJ has agreed a CC-BY licence shall apply, and/or iii) in accordance with the terms applicable for US Federal Government officers or employees acting as part of their official duties; on a worldwide, perpetual, irrevocable, royalty-free basis to BMJ Publishing Group Ltd ("BMJ") its licensees and where the relevant Journal is co-owned by BMJ to the co-owners of the Journal, to publish the Work in this journal and any other BMJ products and to exploit all rights, as set out in our [licence](#).

The Submitting Author accepts and understands that any supply made under these terms is made by BMJ to the Submitting Author unless you are acting as an employee on behalf of your employer or a postgraduate student of an affiliated institution which is paying any applicable article publishing charge ("APC") for Open Access articles. Where the Submitting Author wishes to make the Work available on an Open Access basis (and intends to pay the relevant APC), the terms of reuse of such Open Access shall be governed by a Creative Commons licence – details of these licences and which [Creative Commons](#) licence will apply to this Work are set out in our licence referred to above.

Other than as permitted in any relevant BMJ Author's Self Archiving Policies, I confirm this Work has not been accepted for publication elsewhere, is not being considered for publication elsewhere and does not duplicate material already published. I confirm all authors consent to publication of this Work and authorise the granting of this licence.

**TITLE PAGE****Patient-reported outcome measures for knowledge transfer and behavior modification interventions in type 2 diabetes. The INDICA study: a multi-arm cluster randomized controlled trial****Authors**

Ramallo-Fariña Y<sup>1,2</sup>, Rivero-Santana A<sup>1,2</sup>, García-Pérez L<sup>1,2</sup>, García-Bello MA<sup>1</sup>, Wägner AM<sup>3,4</sup>, González-Pacheco H<sup>1</sup>, Rodríguez-Rodríguez L<sup>1</sup>, Kaiser-Girardot S<sup>5</sup>, Monzón G<sup>5</sup>, Guerra Marrero C<sup>5</sup>, Daranas-Aguilar C<sup>5</sup>, Roldán-Ruano M<sup>5</sup>, Carmona M<sup>2,6</sup>, Serrano-Aguilar P<sup>2,5</sup>, INDICA Team

1 Canary Islands Health Research Institute Foundation (FIISC), Tenerife, Spain

2 Research Network on Health Services in Chronic Diseases (REDISSEC), Madrid, Spain

3 Department of Endocrinology and Nutrition, Insular University Hospital, Las Palmas de Gran Canaria, Spain

4 University Institute for Biomedical and Health Research (UIBS), University of Las Palmas de Gran Canaria (ULPG), Las Palmas de Gran Canaria, Spain

5 Evaluation Unit (SESCS), Canary Islands Health Service (SCS), Tenerife, Spain

6 Health Technology Assessment Agency, Instituto de Salud Carlos III, Madrid, Spain

**Corresponding author**

Yolanda Ramallo Fariña, ([yramfar@sescs.es](mailto:yramfar@sescs.es))

Camino Candelaria, 44. C.S. San Isidro-El Chorrillo  
38109 El Rosario. Tenerife. Spain

**Word count:** 4.701

## ABSTRACT

**Objective:** This study assesses the effectiveness of different interventions of knowledge transfer and behavior modification to improve type 2 diabetes mellitus (T2DM) patients' reported outcomes measures (PROMs) in the long-term. **Design:** Open, community-based pragmatic, multicenter, controlled trial with random allocation by clusters to usual care (UC) or to one of the three interventions.

**Participants:** A total of 2,334 uncomplicated T2DM patients and 211 healthcare professionals were included of 32 Primary Care Centers.

**Setting:** Primary Care Centers in Canary Islands (Spain).

**Intervention:** The intervention for patients (PTI) included an educational group program, logs and a web-based platform for monitoring, and automated SMS. The intervention for professionals (PFI) included an educational program, a decision support tool embedded into the electronic clinical record, and periodic feedback about patients' results. A third group received both PTI and PFI (combined intervention, CBI).

**Outcome measure:** Cognitive-attitudinal, behavioral, affective and health related quality of life (HQoL) variables..

**Results:** Compared to UC at 24 months, the PTI group significantly improved knowledge ( $P=0.005$ ), self-empowerment ( $P=0.002$ ), adherence to dietary recommendations ( $P<0.001$ ), and distress ( $P=0.01$ ). The PFI group improved at 24 months in distress ( $P=0.03$ ) and at 12 months there were improvements in depression ( $P=0.003$ ), anxiety ( $P=0.05$ ), HQoL ( $P=0.005$ ), and self-empowerment ( $P<0.001$ ). The CBI group improved at 24 months in self-empowerment ( $P=0.008$ ) and adherence to dietary recommendations ( $P=0.004$ ) and at 12 months in knowledge ( $P=0.008$ ), depression ( $P=0.006$ ), anxiety ( $P=0.003$ ), distress ( $P=0.01$ ), HQoL ( $P<0.001$ ), and neuropathic symptoms ( $P=0.02$ ). Statistically significant improvements were also observed at 24 months in the proportion of patients who quit smoking for PTI and CBI (41.5% in PTI and 42.3% in CBI vs. 21.2% in the UC group).

**Conclusions:** Assessed interventions to improve PROMs in T2DM attain effectiveness for knowledge, self-empowerment, distress, diet adherence, and tobacco cessation. PTI produced the most lasting benefits.

1  
2  
3 **Trial Registration:** ClinicalTrials.gov NCT01657227 (August 6, 2012)  
4 <https://clinicaltrials.gov/ct2/show/NCT01657227>  
5  
6

7 **Keywords:** Primary Care, Diabetes & Endocrinology, Quality in health Care, Health  
8 Informatics  
9

### 10 11 **Strengths and Limitation of this study**

- 12 - The INDICA study provides randomized evidence on the effectiveness of complex  
13 interventions to improve outcomes in type 2 diabetes mellitus patients, with a longer  
14 follow up than previous studies.
- 15 - All relevant stakeholders in the community are involved in the INDICA study  
16 (patients and family caregivers and primary care professionals).
- 17 - The trial included a large sample of patients with type 2 diabetes regardless of their  
18 baseline HbA1c level, reinforcing the external validity of the results.
- 19 - The INDICA interventions with ICT-based components favor applicability and access,  
20 in a cost-effective manner, to a growing number of patients.
- 21 - A limitation in the use of PROMs is the absence of well-established empirically  
22 derived minimum clinically significant differences  
23  
24  
25  
26  
27  
28  
29  
30  
31  
32  
33  
34  
35  
36  
37  
38  
39  
40  
41  
42  
43  
44  
45  
46  
47  
48  
49  
50  
51  
52  
53  
54  
55  
56  
57  
58  
59  
60

## INTRODUCTION

Many type 2 diabetes mellitus (T2DM) patients do not achieve the recommended treatment goals for glycemic control[1]. This might be due to inappropriate health care access and/or clinical management. Moreover, psychological and emotional aspects, such as knowledge of the disease or diabetes-related distress, are also important issues for an appropriate self-management and glycemic control[2, 3]. Previous research has shown the value of patient-reported outcome measure (PROMs) to monitor these variables in diabetes[4], which contribute to patient empowerment and patient-centered care[5]. PROMs are generally assessed with standardized, validated questionnaires aimed to measure patients' perception of their health status, perceived level of impairment, disability or health-related quality of life[6].

Interventions that aim to empower people with chronic illnesses and specifically diabetes have included distinct strategies such as educational programs, websites, support phone calls, text messages and other technological resources[4, 7-10], in order to improve patients' diabetes knowledge, self-management, psychological outcomes and health status. However, the results obtained have been mixed, with a considerable number of studies showing no effect of the interventions[8-11]. The INDICA study is a pragmatic, cluster-randomized controlled trial with two years follow-up that assesses the effectiveness and cost-effectiveness of multicomponent interventions for knowledge transfer and behavior modification of T2DM patients, their families, and healthcare professionals (physicians and nurses) in a large number of Primary Care Health Practices (PHCP). These interventions combine conventional group educational and training activities with different information and communication technology (ICT)-based interventions to guide the decisions of the main actors involved in the management of T2DM[12]. The intervention for patients (PTI) included an educational group program led by trained nurses, consisting of eight face-to-face sessions (one every three months over two years); continuous self-monitoring by means of logs and a web-based platform; and tailored automated SMS to provide continuous support to patients and to reinforce self-care and lifestyle changes. The intervention for professionals (PFI) included an educational program to update their diabetes knowledge, a decision support tool embedded into the electronic clinical record with recommendations based on best

1  
2  
3 available scientific knowledge, adapted to the specific needs of every patient, and periodic  
4 feedback about patients' results.  
5  
6

7 The results on the effectiveness of these interventions on clinical outcomes can be seen  
8 in Ramallo-Fariña et al.[13], and the cost-effectiveness evaluation can be reviewed in  
9 García-Pérez et al.[14]. The aim of this article is to report the effect of the INDICA  
10 interventions on a set of PROMs assessed in the trial: cognitive-attitudinal (knowledge,  
11 empowerment), behavioral (adherence to the dietary recommendation, medication and  
12 tobacco use), affective (anxiety, depression, distress) and health-related quality of life  
13 dimensions. These outcomes are commonly targeted for most diabetes interventions  
14 because of their association with critical, longer-term outcomes, such as functional  
15 capacity[15], complications[16-18], mortality[19], healthcare costs[20], and quality of  
16 life[21].  
17  
18  
19  
20  
21  
22  
23  
24  
25  
26  
27  
28  
29  
30  
31  
32  
33  
34  
35  
36  
37  
38  
39  
40  
41  
42  
43  
44  
45  
46  
47  
48  
49  
50  
51  
52  
53  
54  
55  
56  
57  
58  
59  
60

## **METHODS**

### **Trial design**

The INDICA study is an open, community-based pragmatic, multicenter, controlled trial with random allocation by clusters to usual care or one of three multicomponent interventions of knowledge transfer and behavior modification. One intervention was aimed at patient and family members (PTI); another intervention was aimed at primary care healthcare professionals (physicians and nurses) (PFI) and the third intervention combined the other two (CBI). In the control group, both patients/families and physicians/nurses received the usual activities provided by the PHCP. The full study protocol has been published before[12].

### **Study Participants**

The INDICA study included adults aged 18 to 65 years who had been diagnosed with T2DM at least one year before, did not have any diabetes-related complications, and used a mobile phone regularly[12]. Family Care Units (FCU) in each PHCP, comprised of a family physician and a nurse, were the recruitment unit. All PHCPs included had to have at least eight FCUs and the availability of appropriate facilities to provide educational group sessions. FCUs planning or awaiting placement changes among PHCP in the first six months after the project began were excluded.

### **Setting and recruitment**

PHCPs were randomly selected in the islands of Tenerife, Gran Canaria, Lanzarote, and La Palma (Canary Islands, Spain). Moreover, FCUs were randomly selected from all consenting FCUs at each PHCP. The electronic clinical records (ECR) of all potentially eligible patients in selected FCUs were screened to verify inclusion and exclusion criteria.

### **Patient and public involvement**

Patients were actively involved in the design of the trial. Two associations of patients with T2DM in the Canary Island were included from the beginning of the study as part of the research team, with an active participation in the design of the interventions and selection of the outcomes measured. In the same way, primary care professionals and clinical management staff participated in the elaboration of the protocol. The patients and



1  
2  
3 professionals included in the study could express their satisfaction with the interventions  
4 through a questionnaire, as well as through focus groups and in-depth interviews that will  
5 be the objective of another publication. Finally, we established a commitment with  
6 patients and healthcare professionals to share the results with them in an easy-to-  
7 understand way.  
8  
9

## 10 11 12 **Random assignment**

13  
14  
15 Randomization was applied at different levels. First, three different strata were created  
16 according to the geographic areas in the more populated islands (Tenerife and Gran  
17 Canaria). Second, four PHCP (clusters) were randomly allocated to every geographic  
18 stratum and block permutation was used to assign PHCPs to the study arms; the PHCP  
19 being the sampling unit. La Palma and Lanzarote (less populated islands) were  
20 geographically divided into four zones with only one eligible PHCP available in each  
21 zone randomly assigned to one of the study arms. In every island, all arms were equally  
22 distributed. Six FCUs were randomly selected, from all those consenting to participate in  
23 each PHCP. From all patients fulfilling inclusion criteria and consenting to participate in  
24 each PHCP, 15 were randomly selected per FCU. Exceptionally, more than six FCUs or  
25 more than 15 patients per FCU were selected, to try to recruit 90 patients in every PHCP.  
26 However, it was not possible to attain this objective of 90 patients in all PHCP as there  
27 were insufficient patients in all FCU selected that complied with the inclusion and  
28 exclusion criteria.  
29  
30

31  
32  
33  
34  
35  
36  
37  
38  
39  
40  
41  
42  
43  
44  
45  
46  
47  
48  
49  
50  
51  
52  
53  
54  
55  
56  
57  
58  
59  
60  
FCU and patient randomization were performed by simple generation from a list of  
random numbers.

## 44 45 **Interventions**

### 46 47 48 *Patient interventions*

49  
50  
51  
52  
53  
54  
55  
56  
57  
58  
59  
60  
Patients recruited to the PTI and CBI groups received a complex intervention of  
knowledge transfer and behavior modification, informed by conceptual frameworks of  
behavioral change[16]. The intervention combined: A) an eight-session, conventional,  
group educational program given by a nurse specialized in diabetes; B) monitoring of  
physical activity, diet, drug adherence, mood, blood pressure, and blood glucose readings  
by daily use of paper workbooks, complemented by weekly access to a website platform

1  
2  
3 to upload paper workbook data; and C) continuous, personalized feedback by semi-  
4 automated mobile phone messages (SMS), modified according to the website  
5 information.  
6  
7

### 8 9 *Interventions for primary care professionals*

10  
11  
12 Primary care professionals recruited to the PFI and CBI groups received a complex  
13 intervention of knowledge transfer and decision support, informed by the determinants of  
14 behavior change suggested by Michie et al.[22] for its design and implementation. The  
15 intervention included: A) an educational and interactive group program of two sessions  
16 to update clinical management information and promote patient-centered care; B) an  
17 automated decision aid tool, based on a CPG for T2DM embedded into the electronic  
18 clinical record; and C) monthly computerized graphic feedback, which displayed a set of  
19 processes and outcome indicators for all T2DM patients of the corresponding FCU  
20 compared to other FCU in their setting and the FCU with the best results. Both  
21 interventions were applied during the two years follow-up.  
22  
23  
24  
25  
26  
27  
28  
29

### 30 **Duration of fieldwork**

31  
32  
33 Fieldwork took place between February 2013 and October 2016. The first year and the  
34 following two years were devoted to recruitment of patients and healthcare providers, and  
35 intervention and follow-up, respectively. As interventions were maintained over time,  
36 intervention and follow-up periods overlapped.  
37  
38  
39

### 40 **Outcomes**

#### 41 *Cognitive-attitudinal outcomes*

42  
43  
44 To assess potential changes in patient knowledge about T2DM and its self-management,  
45 we developed a specific instrument created in the context of this project, named DIATEK,  
46 which consisted of 30 questions. Each item has four response options and only one correct  
47 answer. Items examined risk factors for disease development and deterioration, objective  
48 values for biochemical parameters; recommendations on nutrition, physical activity, drug  
49 use and self-management. The total score, obtained by adding all correct responses, and  
50 ranging from 0 to 30, was later rescaled from 0 to 10.  
51  
52  
53  
54  
55  
56  
57  
58  
59  
60

1  
2  
3 The Diabetes Empowerment Scale-Short Form (DES-SF)[23] is a validated questionnaire  
4 designed to evaluate psychosocial self-efficacy in diabetes. DES-SF is the short form of  
5 the original DES, which includes eight items (need for change, developing a plan,  
6 overcoming barriers, asking for support, supporting oneself, coping with emotion,  
7 motivating oneself, and making diabetes care choices appropriate for one's priorities and  
8 circumstances) with responses on a five-point Likert scale and an overall range from eight  
9 to 40, according to increasing patient empowerment.

#### 16 *Behavioral outcomes*

17  
18  
19 The Mediterranean Diet Adherence Screener (MEDAS)[24] is a validated questionnaire  
20 to assess dietary recommendation adherence, which consists of 14 targets for food  
21 consumption, rated with one point for each target attained. According to the final score,  
22 patients are classified as having low (0-6 points), moderate (7-10) or high adherence (11-  
23 14 points) to the Mediterranean diet.

24  
25  
26 The Morisky Medication Adherence Scale (MGLS)[25] assesses drug-treatment  
27 adherence, by means of a validated four-item self-report instrument and a final score  
28 ranging from 0 to 4. Patients are considered adherent, only if they obtain four points.

29  
30  
31 Smoking status was monitored from baseline and during follow-up, to check for potential  
32 cessation throughout the study.

#### 37 *Affective outcomes*

38  
39  
40  
41 The State Trait Anxiety Inventory (STAI-S)[26] is a validated patient-reporting  
42 questionnaire that includes two non-dependent scales; the applied state-anxiety scale  
43 (STAI State) and the trait-anxiety scale (STAI Trait). It assesses transient emotional state  
44 or condition as characterized by subjective feelings of tension and apprehension that can  
45 fluctuate in time and intensity. The STAI-S includes 20 items, with each item scored on  
46 a four-point Likert scale. Anxiety is defined by a cut-off point  $\geq 30$ .

47  
48  
49 The Beck Depression Inventory II (BDI-II)[27] consists of 21 items scored on a four-  
50 point scale from 0 ("not at all") to 3 ("most of the time"). The items assess depression  
51 symptoms in the last two weeks. All item scores are added to a maximum score of 63. A  
52 BDI-II score of  $\geq 14$  indicates mild depressive symptoms.

1  
2  
3 The Diabetes Distress Scale (DDS2)[28] is a validated two-item diabetes distress-  
4 screening instrument that asks respondents to rate, on a six-point scale, the degree of  
5 distress caused by the two following items: (1) feeling overwhelmed by the demands of  
6 living with diabetes and (2) feeling that I am often failing with my diabetes regimen. High  
7 Diabetes distress can be identified by an average score  $\geq 3$  or more, low distress by scores  
8 under two, and moderate distress by the scores in between.  
9

#### 14 *Health- related quality of life and symptoms*

16  
17 The Audit of Diabetes-Dependent Quality of life (ADDQoL-19)[29] is a specific HRQoL  
18 questionnaire for diabetes. It assesses 19 domains, each with its impact and importance  
19 index to provide an integrated score for each domain. The sum of the score in each domain  
20 forms the global score (range: -9 to 3). The lower the score, the worse the quality of life.  
21

22  
23 The Michigan Neuropathy Screening Instrument (MNSI)[30] is an instrument that  
24 measures the incidence of distal diabetic peripheral polyneuropathy. It is composed of 15  
25 self-administered items, in which the abnormal responses are added. A score of seven or  
26 more is considered abnormal.  
27

#### 32 *Satisfaction*

33 An ad-hoc self-completed questionnaire (INDICA-SATP) was developed to measure  
34 satisfaction with each component of the interventions in PTI and CBI groups. It was  
35 measured in the 24-month follow-up in patients who, having attended the group  
36 educational program, also used the web platform or received the semi-automated mobile  
37 phone messages. Satisfaction with each component was valued from 0 to 10 points, with  
38 10 reflecting maximum satisfaction.  
39

40  
41 All information, including demographic data, overall and personal health history, diabetes  
42 health status, current medications, smoking status, and risk factors for complications, was  
43 obtained in a face to face interview at baseline and at 3, 6, 12, 18 and 24 months of follow-  
44 up. Similarly, all self-administered questionnaires (ADDQoL-19, BDI-II, DES-SF,  
45 DDS2, DIATEK, MEDAS, STAI-S, MGLS and MNSI), were distributed and collected  
46 at baseline, and at 12 and 24 months follow-up. ADDQoL-19, MEDAS and MGLS were  
47 also applied at 6 and 18 months.  
48

49  
50 Two other questionnaires were included in the trial registry and the published  
51 protocol[12], the *International Physical Activity Questionnaire* (IPAQ) and a scale  
52  
53  
54  
55  
56  
57  
58  
59  
60

1  
2  
3 developed for this project to assess patients' attitudinal changes regarding lifestyles  
4 (INDICA-LSQ). However, the data quality checking identified many inconsistent or  
5 meaningless responses to these questionnaires, which indicates that patients did not  
6 correctly understand the instructions. Therefore, we decided to exclude them from the  
7 analyses.  
8  
9

## 10 11 12 **Statistical Analysis**

13  
14  
15 Multilevel mixed models including the baseline value of dependent variables and time  
16 elapsed since diagnosis (in years) as covariates were implemented for all PROMs. First  
17 level variables are those corresponding to each measurement along follow-up (repeated  
18 time measurements). The second level includes patient variables (the baseline value of  
19 dependent variables and time elapsed since diagnosis) and third level variables  
20 correspond to PHCP in which patients are grouped (the variable arm to which PHCP was  
21 assigned is included in this level). The effect that identifies the intervention arm has been  
22 considered fixed for the different PHCP, whilst the intercept has been considered random.  
23 The model also included an interaction term between arm and month, which allows for  
24 differences in the intervention effect between follow-up assessments[31]. The intraclass  
25 correlation coefficient (ICC) was obtained for each model for the PHCP and by patient  
26 according to their PHCP. The adjusted estimated mean was calculated for each follow up  
27 moment compared to baseline; and its statistical significance was calculated by means of  
28 the model already set out. The relative improvement for each follow-up was obtained as  
29 the ratio between the adjusted difference in mean between the intervention and control  
30 group and the mean of the control group.  
31  
32

33  
34  
35 A logistic regression model was implemented to compare the proportion of patients who  
36 quit smoking at each follow-up, by intervention arm. Only basal smokers were included  
37 in the analysis.  
38  
39

40  
41  
42  
43  
44  
45  
46  
47  
48  
49  
50  
51  
52  
53  
54  
55  
56  
57  
58  
59  
60  
61  
62  
63  
64  
65  
66  
67  
68  
69  
70  
71  
72  
73  
74  
75  
76  
77  
78  
79  
80  
81  
82  
83  
84  
85  
86  
87  
88  
89  
90  
91  
92  
93  
94  
95  
96  
97  
98  
99  
100  
101  
102  
103  
104  
105  
106  
107  
108  
109  
110  
111  
112  
113  
114  
115  
116  
117  
118  
119  
120  
121  
122  
123  
124  
125  
126  
127  
128  
129  
130  
131  
132  
133  
134  
135  
136  
137  
138  
139  
140  
141  
142  
143  
144  
145  
146  
147  
148  
149  
150  
151  
152  
153  
154  
155  
156  
157  
158  
159  
160  
161  
162  
163  
164  
165  
166  
167  
168  
169  
170  
171  
172  
173  
174  
175  
176  
177  
178  
179  
180  
181  
182  
183  
184  
185  
186  
187  
188  
189  
190  
191  
192  
193  
194  
195  
196  
197  
198  
199  
200  
201  
202  
203  
204  
205  
206  
207  
208  
209  
210  
211  
212  
213  
214  
215  
216  
217  
218  
219  
220  
221  
222  
223  
224  
225  
226  
227  
228  
229  
230  
231  
232  
233  
234  
235  
236  
237  
238  
239  
240  
241  
242  
243  
244  
245  
246  
247  
248  
249  
250  
251  
252  
253  
254  
255  
256  
257  
258  
259  
260  
261  
262  
263  
264  
265  
266  
267  
268  
269  
270  
271  
272  
273  
274  
275  
276  
277  
278  
279  
280  
281  
282  
283  
284  
285  
286  
287  
288  
289  
290  
291  
292  
293  
294  
295  
296  
297  
298  
299  
300  
301  
302  
303  
304  
305  
306  
307  
308  
309  
310  
311  
312  
313  
314  
315  
316  
317  
318  
319  
320  
321  
322  
323  
324  
325  
326  
327  
328  
329  
330  
331  
332  
333  
334  
335  
336  
337  
338  
339  
340  
341  
342  
343  
344  
345  
346  
347  
348  
349  
350  
351  
352  
353  
354  
355  
356  
357  
358  
359  
360  
361  
362  
363  
364  
365  
366  
367  
368  
369  
370  
371  
372  
373  
374  
375  
376  
377  
378  
379  
380  
381  
382  
383  
384  
385  
386  
387  
388  
389  
390  
391  
392  
393  
394  
395  
396  
397  
398  
399  
400  
401  
402  
403  
404  
405  
406  
407  
408  
409  
410  
411  
412  
413  
414  
415  
416  
417  
418  
419  
420  
421  
422  
423  
424  
425  
426  
427  
428  
429  
430  
431  
432  
433  
434  
435  
436  
437  
438  
439  
440  
441  
442  
443  
444  
445  
446  
447  
448  
449  
450  
451  
452  
453  
454  
455  
456  
457  
458  
459  
460  
461  
462  
463  
464  
465  
466  
467  
468  
469  
470  
471  
472  
473  
474  
475  
476  
477  
478  
479  
480  
481  
482  
483  
484  
485  
486  
487  
488  
489  
490  
491  
492  
493  
494  
495  
496  
497  
498  
499  
500  
501  
502  
503  
504  
505  
506  
507  
508  
509  
510  
511  
512  
513  
514  
515  
516  
517  
518  
519  
520  
521  
522  
523  
524  
525  
526  
527  
528  
529  
530  
531  
532  
533  
534  
535  
536  
537  
538  
539  
540  
541  
542  
543  
544  
545  
546  
547  
548  
549  
550  
551  
552  
553  
554  
555  
556  
557  
558  
559  
560  
561  
562  
563  
564  
565  
566  
567  
568  
569  
570  
571  
572  
573  
574  
575  
576  
577  
578  
579  
580  
581  
582  
583  
584  
585  
586  
587  
588  
589  
590  
591  
592  
593  
594  
595  
596  
597  
598  
599  
600  
601  
602  
603  
604  
605  
606  
607  
608  
609  
610  
611  
612  
613  
614  
615  
616  
617  
618  
619  
620  
621  
622  
623  
624  
625  
626  
627  
628  
629  
630  
631  
632  
633  
634  
635  
636  
637  
638  
639  
640  
641  
642  
643  
644  
645  
646  
647  
648  
649  
650  
651  
652  
653  
654  
655  
656  
657  
658  
659  
660  
661  
662  
663  
664  
665  
666  
667  
668  
669  
670  
671  
672  
673  
674  
675  
676  
677  
678  
679  
680  
681  
682  
683  
684  
685  
686  
687  
688  
689  
690  
691  
692  
693  
694  
695  
696  
697  
698  
699  
700  
701  
702  
703  
704  
705  
706  
707  
708  
709  
710  
711  
712  
713  
714  
715  
716  
717  
718  
719  
720  
721  
722  
723  
724  
725  
726  
727  
728  
729  
730  
731  
732  
733  
734  
735  
736  
737  
738  
739  
740  
741  
742  
743  
744  
745  
746  
747  
748  
749  
750  
751  
752  
753  
754  
755  
756  
757  
758  
759  
760  
761  
762  
763  
764  
765  
766  
767  
768  
769  
770  
771  
772  
773  
774  
775  
776  
777  
778  
779  
780  
781  
782  
783  
784  
785  
786  
787  
788  
789  
790  
791  
792  
793  
794  
795  
796  
797  
798  
799  
800  
801  
802  
803  
804  
805  
806  
807  
808  
809  
810  
811  
812  
813  
814  
815  
816  
817  
818  
819  
820  
821  
822  
823  
824  
825  
826  
827  
828  
829  
830  
831  
832  
833  
834  
835  
836  
837  
838  
839  
840  
841  
842  
843  
844  
845  
846  
847  
848  
849  
850  
851  
852  
853  
854  
855  
856  
857  
858  
859  
860  
861  
862  
863  
864  
865  
866  
867  
868  
869  
870  
871  
872  
873  
874  
875  
876  
877  
878  
879  
880  
881  
882  
883  
884  
885  
886  
887  
888  
889  
890  
891  
892  
893  
894  
895  
896  
897  
898  
899  
900  
901  
902  
903  
904  
905  
906  
907  
908  
909  
910  
911  
912  
913  
914  
915  
916  
917  
918  
919  
920  
921  
922  
923  
924  
925  
926  
927  
928  
929  
930  
931  
932  
933  
934  
935  
936  
937  
938  
939  
940  
941  
942  
943  
944  
945  
946  
947  
948  
949  
950  
951  
952  
953  
954  
955  
956  
957  
958  
959  
960  
961  
962  
963  
964  
965  
966  
967  
968  
969  
970  
971  
972  
973  
974  
975  
976  
977  
978  
979  
980  
981  
982  
983  
984  
985  
986  
987  
988  
989  
990  
991  
992  
993  
994  
995  
996  
997  
998  
999  
1000

Analysis was performed on an intention-to-treat basis, that is, participants were analyzed in the group to which they were randomized. Missing values were treated by means of multiple imputation procedures[32], with results based on 100 imputed datasets (missing values from all follow up visits were imputed). Analysis under multiple imputation is valid for randomly missing data[33]. We compared the results of imputed and non-imputed data. All the analyses were conducted using STATA version 15.0[34]. Differences were considered statistically significant if  $P < 0.05$ .

### **Ethical approval and consent to participate**

All participants provided written informed consent. The scientific and ethics committees of both the University Hospital of Canarias (ID: 2012\_44) and the University Hospital Nuestra Señora de la Candelaria (ID: EPA-07/10) approved the study protocol. The study was performed in accordance with Good Clinical Practice standards, prevailing local regulatory requirements, and Declaration of Helsinki recommendations.

For peer review only

## RESULTS

### Study Participants

A total of 2334 patients and 211 healthcare professionals were included. Figure 1 shows the flowchart with cluster randomization of patients for each intervention, attendance at educational/training sessions of patients and professionals and the number of PROMs questionnaires received for each follow-up assessment. The patients' baseline characteristic according to the intervention assignment can be seen in Ramallo-Fariña et al.[13]. Mean age of the whole population was  $55.7 \pm 7.1$  years, with 51.9% women. Mean baseline HbA1c was 7.3%/56 mmol/mol. From baseline, 49.4% of patients started with HbA1c levels within the accepted therapeutic goal ( $\leq 7\%/53$  mmol/mol). There were no statistically significant differences among groups in terms of their baseline characteristics.

Intention-to-treat results, reported below, were very similar to those obtained with non-imputed data. Only three discrepancies were observed that will be discussed in the corresponding outcome section. Results at all time points are shown in Tables 1 (inter-group differences), 2 and 3 (intra-group changes).

#### *Cognitive-attitudinal outcomes*

Table 1 shows that the level of knowledge about diabetes is significantly higher for PTI ( $P=0.007$ ) and CBI ( $P=0.008$ ), compared with UC, at 12 months; and for PTI ( $P=0.005$ ) at 24 months.

Patient empowerment was significantly higher for PFI and CBI groups, compared to UC at 12 months ( $P<0.001$  for both comparisons). Analysis of non-imputed data led to a  $P$ -value of 0.05 for the difference between PTI and UC, favoring the former, at this time point. At 24 months, PTI and CBI also attained significantly higher scores than UC ( $P=0.002$  and  $P=0.008$ , respectively); while differences with PFI are marginally significant.

#### *Behavioral outcomes*

Table 1 shows that the PTI group is significantly more adherent to the diet recommendations, compared to UC, after 12 months of follow-up. There is a difference of 0.87 ( $P<0.001$ ) at 24 months. Adherence improves for CBI from 18 months, compared

1  
2  
3 to UC, with differences of 0.7 ( $P=0.004$ ) at 24 months. Adherence levels remain moderate  
4 for all patient groups throughout follow-up (see Table 2).  
5  
6

7 No differences were found in medication adherence, compared to UC (Table 1). However,  
8 average levels of medication adherence were significantly improved in all four groups,  
9 despite the high baseline levels ( $>3$ ) (see Table 2).  
10  
11  
12

13 Table 3 shows the reduction in the proportion of smokers who quit smoking during follow  
14 up in PTI (12 months), and CBI (18 months), compared to UC. With non-imputed data  
15 the reduction was statistically significant from month 6 for PTI ( $P=0.023$ ) and month 12  
16 for CBI ( $P=0.025$ ). The percentage of patients who quit smoking at 24 months was 41.5%  
17 for PTI ( $P=0.012$ ) and 42.3% ( $P=0.012$ ) for CBI, versus 21.2% for UC group. There were  
18 no statistically significant differences between groups in the baseline percentage of  
19 smokers ( $P=0.99$ ).  
20  
21  
22  
23  
24  
25

#### 26 *Affective outcomes*

27 Compared to UC, both PFI and CBI show statistically significant differences at 12 months  
28 for depression ( $P=0.003$  and  $P=0.006$ , respectively), and anxiety ( $P=0.05$  and  $P=0.003$ ,  
29 respectively) (Table 1). These differences disappear at 24 months because all groups of  
30 patients improved (Table 2).  
31  
32  
33

34 The diabetes distress score improved significantly compared to the UC group for CBI at  
35 12 months ( $P=0.01$ ) and for PTI and PFI at 24 months ( $P=0.01$  and  $P=0.03$ , respectively).  
36 The score remained marginally significant for CBI (Table 1). At baseline, all patient  
37 groups showed moderate distress, which decreased to a low level from 12 months, except  
38 for the UC group, which did so at 24 months (Table 2).  
39  
40  
41  
42  
43

#### 44 *Health-related quality of life and symptoms*

45 HRQoL significantly improved for all intervention groups, at 12 months, compared to  
46 UC; a difference only maintained for PTI at 18 months ( $P=0.02$ ) (Table 1).  
47  
48

49 Neuropathic symptom scores were significantly lower for the CBI group at 12 months  
50 ( $P=0.02$ ) compared to the UC group (the analysis of non-imputed data led to a non-  
51 significant result,  $P=0.12$ ). This difference disappeared at 24 months (Table 1). Mean  
52 baseline scores for all groups were under 4, considerably below the cut-off point of 7 for  
53 abnormal classification (Table 4).  
54  
55  
56  
57  
58  
59  
60



### *Satisfaction*

Table 5 shows the patients' satisfaction with the intervention received. While average scores were higher than 9/10, in all dimensions, for the group educational sessions, satisfaction with the web platform and SMS obtained scores above 8.

Table 6 shows a summary of the results at 12 and 24 months.

For all PROMs, ICC values were close to zero at the PHCP level thus reflected a very small effect associated with PHCP for interventions and control groups (similar results among PHCP in every arm). The ICC at the patient level was broad, accounting for considerable variations among individuals.

## DISCUSSION

This article assesses the effect of interventions implemented by the INDICA study to improve T2DM outcomes on several health measures self-perceived by patients in the cognitive-attitudinal (knowledge, empowerment), behavioral (i.e., adherence to the dietary recommendations, medication and tobacco use), affective (anxiety, depression, distress) and health-related quality of life dimensions. The INDICA study is a pragmatic cluster-randomized study with two years follow up that assesses the effectiveness of multicomponent interventions for knowledge transfer and behavior modification of patients, families, and healthcare professionals (physicians and nurses) at the primary care level.

At one-year follow-up, the combined intervention lead to obtaining significant results in all outcomes except diet and medication adherence. Relative improvements compared to usual care ranged between 9.6% (knowledge) and 52.2% (HRQoL), with intermediate values for anxiety (26.1%) and depression (28.7%). Significant improvements in HRQoL were also obtained for the PTI and PFI groups, although of less intensity (24.8% and 31.7%, respectively). However, they showed different results in the remaining variables: the PTI group improved in terms of knowledge and behavioral outcomes (i.e., diet and smoking), while the PFI improved in regard to empowerment and depression, but obtained a significantly worse result than the UC group for diet adherence.

After two years of follow-up, there were no significant differences in HRQoL, anxiety or depression, mainly due to the improvement experienced by the UC group in these variables. The PTI group obtained the best overall results, with significant improvements in the cognitive (i.e., knowledge, empowerment), affective (i.e., diabetes distress) and behavioral (i.e., diet and tobacco) variables. The same significant results were obtained for the combined intervention, except for knowledge and distress. Finally, the PFI group outperformed usual care only for distress, and showed a significantly worse result in regard to knowledge. There were no statistically significant differences in medication adherence during all the follow-up, although a ceiling effect could have occurred, since all groups showed high scores at baseline.

Therefore, the best results were observed in both groups including patients (PTI and CBI), similar to the findings observed on clinical outcomes[13]. This is not

1  
2  
3 surprising, given the straightforward and continuous application of these patient  
4 interventions, and the high reported satisfaction levels with all the intervention  
5 components (educational sessions, web resources and SMS). Previous studies that  
6 combined education and training with support phone calls, assessing interventions aimed  
7 at empowering diabetes patients to improve self-care and outcomes, showed inconsistent  
8 results between clinical variables and PROMS[8, 9]. The use of one-way messages such  
9 as those used in INDICA, appears to significantly and consistently improve HbA1c levels,  
10 although with a small-to-moderate effect-size (-0.38%, 95%CI: -0.53; -0.23)[10]. In  
11 addition, continuous advances in smart mobile technology provide new possibilities for  
12 diabetes self-management, despite the fact that evidence on the effectiveness of these new  
13 functionalities remains scarce and uncertain[11, 35].

22  
23 Reduction in the number of smokers in interventions applied directly to patients (PTI and  
24 CBI) in regard to UC that remain significant at 24 months with percentages of  
25 approximately 42% which is 2.5 times the result obtained by the most extended  
26 pharmacologic intervention (replacement nicotine therapy). This is according to a meta-  
27 analysis published recently[36] which puts this reduction at 16.9% of the intervened  
28 group compared to 10.4% of the control group in studies with follow up varying from six  
29 to 24 months.

35  
36 The intervention effect on professionals raises questions. At one year of follow-up, the  
37 PFI and CBI groups obtained improvements in psychological variables not affected by  
38 the intervention targeted exclusively at patients (PTI) (i.e., empowerment, anxiety,  
39 depression). These findings could be interpreted as the lasting result of better shared  
40 decision-making/patient-centered care by professionals trained in this care model.  
41 However, the PTI group was the only group to show significant improvements in  
42 behavioral variables (diet adherence and tobacco consumption); while PFI obtained  
43 significantly worse results for diet adherence from the sixth month, and CBI did not show  
44 significant benefits for these two outcomes until 18 months. These negative findings from  
45 groups containing professionals are repeated after two years in the case of knowledge, a  
46 variable in which the CBI group did not obtain significant differences. This interpretation  
47 should be considered cautiously given the analysis limitations, since the differences  
48 between intervention groups have not been statistically contrasted. As a recent Cochrane  
49 review[37] reported, current evidence on the effect of interventions to promote shared  
50 decision making by healthcare professionals shows benefits when decision making is  
51  
52  
53  
54  
55  
56  
57  
58  
59  
60

1  
2  
3 assessed by external observers but not by patient's assessment; furthermore, no  
4 significant effects were observed in most patient-reported outcomes[37]. Given the  
5 paucity and limited quality of available studies, more focused research is needed to draw  
6 solid conclusions about the effect of interventions aimed at professionals, and the  
7 mechanisms by which these interventions translate into psychological, behavioral and  
8 health changes of patients.  
9

10 The assessment of clinical outcome measures in the INDICA study[13] for the total  
11 sample recruited regardless of Hb1Ac levels (only 50.6% of all participants had baseline  
12 HbA1c concentrations >7%, with a mean of 7.3%), showed an early and significant but  
13 temporary reduction in HbA1c for the PTI group, compared to UC, from 3 to 6 months.  
14 Even so, more than 30% of the intervened patients (PTI and CBI) attained statistically  
15 and clinically relevant reductions in HbA1c (>0.4%); significantly higher than UC at 12  
16 and 18 months.  
17

18 In the group of patients with baseline HbA1c greater than 7% (uncontrolled patients), the  
19 magnitude of the intervention effect on clinical outcomes was greater, especially in the  
20 PTI group compared to the UC group, with significant differences up to 18 months, and  
21 a significant area under the curve at 24 months for PTI compared to UC[13]. These results  
22 are supported by other studies that report greater intervention effects in patients with  
23 higher HbA1c levels[38, 39]. Longer-term reductions in blood pressure were also found  
24 in the two groups in which professionals were intervened, with smaller effects in the  
25 remaining clinical measures (lipid profile, body mass index, serum creatinine and  
26 glomerular filtration rate). Some of these results are more related to changes in medication  
27 than lifestyles. From a cost-effectiveness perspective, small differences were observed  
28 between groups after two years follow up. The PTI was more effective and less costly  
29 than CBI and PFI, in patients with HbA1c>7%[14]. This prompted the conclusion that  
30 interventions focused on patients with the highest needs would limit the impact on the  
31 health care sector budget.  
32

33 This study has several limitations. The high number of instruments and measurement  
34 times increase the risk of type 1 error, which explains the decision not to compare  
35 intervention groups with each other. Moreover, the use of PROMs makes it necessary to  
36 know the minimum clinically significant differences of every instrument used. This  
37 difference, however, has not been investigated for most of them, and there is currently no  
38 consensus on the appropriate method (distribution or anchor-based) and/or statistics (e.g.,  
39 absolute versus relative reduction)[40]. Furthermore, the use of PROMs implies by  
40  
41  
42  
43  
44  
45  
46  
47  
48  
49  
50  
51  
52  
53  
54  
55  
56  
57  
58  
59  
60

1  
2  
3 definition an unblind assessment of results, which is added to the impossibility of blinding  
4 the participants regarding the intervention. Finally, the INDICA study was not designed  
5 to test the efficacy of every single component of the interventions assessed (e.g., text  
6 messages vs. patient education vs web content). Despite these limitations, the INDICA  
7 study presents some distinctive characteristics from other published studies that assess  
8 the impact of interventions promoting empowerment, self-management and behavior  
9 modification to patients and professionals: 1) a robust design (pragmatic cluster-  
10 randomized controlled trial with a factorial design for intervention arms) with a long  
11 follow-up (two years); 2) incorporation of the different actors involved in disease  
12 management (patients and family caregivers and primary care professionals; 3) greater  
13 external validity by including patients regardless of their baseline HbA1c levels; 4)  
14 incorporation of ICT-based components to the intervention that favors applicability and  
15 access, in a cost-effective manner, to a growing number of patients; and 5) inclusion of a  
16 large sample size with 2334 patients and 211 healthcare professionals.

17  
18  
19  
20  
21  
22  
23  
24  
25  
26  
27  
28 In conclusion, all the interventions assessed improved patients HRQoL at one year of  
29 follow-up, with differences according to the intervention in the remaining PROMs  
30 examined. The intervention targeted exclusively at patients (PTI) significantly improved  
31 knowledge, empowerment, distress, dietary recommendation adherence and tobacco  
32 cessation, up to two years of follow-up. Although the clinical relevance of these effects  
33 is uncertain, except in the case of smoking cessation, these results are promising since  
34 they reflect improvements in all personal domains assessed (cognitive, attitudinal,  
35 affective, behavioral), which highlight the importance of behavioral factors to attain good  
36 health outcomes. The intervention on professionals improved affective variables at one  
37 year of follow-up, but showed virtually no effects at two years together with a negative  
38 effect on diet adherence and no effect on tobacco consumption, which emphasizes the  
39 need for more focused evaluative research on this type of intervention. For both target  
40 groups (patients and professionals), the use of ICT can be a major help to improve care  
41 access and continuity; as well as effectiveness and cost-effectiveness in T2DM self-  
42 management.

43  
44  
45  
46  
47  
48  
49  
50  
51  
52  
53  
54  
55  
56  
57  
58  
59  
60  
Figure 1. CONSORT (Consolidated Standards of Reporting Trials) flow diagram.

## STATEMENTS

## Acknowledgements

We thank Prof Clare Bradley and Health Psychology Research Limited (owners and source of the ADDQoL-19 questionnaire) for allowing the use of their questionnaire in the INDICA Study. We also thank Jason Willis-Lee for copyediting services during preparation of the final manuscript, and Thayli León Plasencia for her help in recruiting patients.

## Conflicts of interest/Competing interests

The authors declare that they have no competing interest.

## Competing interests

The authors declare that they have no competing interest.

## Availability of data and material

The datasets generated and/or analyzed during the current study, including deidentified participant data are available from the corresponding author on reasonable request in the next 10 years. The study protocol is available at <https://implementationscience.biomedcentral.com/articles/10.1186/s13012-015-0233-1>

## Funding

This work was supported by the Spanish Ministry of Economy, Industry and Competitiveness (Instituto de Salud Carlos III), grant number: ADE10/00032 and PI16/00769 co-funded by the European Regional Development Fund (ERDF) “A way to make Europe”. The funders did not participate in the study design; collection, management, analysis, and interpretation of data; writing of the report; and the decision to submit the report for publication.

## Author Contributions

YRF, LGP, LRR, AMW, MRR and PSA contributed to the study design. SKG, GM, CGM, CDA and MRR developed the contents and gave the educational sessions to patients. Also, SKG, GM, CGM, CDA and MRR recruited participants and collected data. YRF, MAGB and HGP contributed to the statistical analyses. YRF, ARS, LGP, AMW and PSA were part of the writing committee of the manuscript. All authors reviewed, commented on, and approved the final manuscript.

The INDICA team included the following members (alphabetical order): Abraham Pérez de la Rosa (Canary Islands Health Research Institute Foundation, FIISC), Alicia Pareja Ríos (University Hospital of Canary Island), Andrés Sifre Perello (Molina Orosa

1  
2  
3 Hospital), Ángela Trinidad Gutiérrez Pérez (Primary Care of Gran Canaria), Antonio  
4 Cabrera de León (Ntra. Sra. de la Candelaria University Hospital), Antonio García  
5 Quintana (Dr. Negrín University Hospital), Armando Carrillo Domínguez (Insular  
6 University Hospital), Bernardo Eusebio Herrera Domínguez (General de La Palma  
7 Hospital), Carlos Sedeño Pérez (Primary Care of Tenerife), Carlos Ramírez Álamo  
8 (Primary Care of Gran Canaria), Cecilia Lobos Soto (Insular University Hospital),  
9 Cristina Padrón Pérez (Canary Islands Health Research Institute Foundation, FIISC),  
10 Dácil Alvarado Martel (Dr. Negrín University Hospital), Daniel Hernández Obregón (Dr.  
11 Negrín University Hospital), Dulce N. Hernández Correa (Primary Care of Gran Canaria),  
12 Elsa Espinosa Pozuelo (Diabetes Patient' association of Tenerife), Elsa Florido Mayor  
13 (Canary Islands Health Research Institute Foundation, FIISC), Engracia Pinilla  
14 Domínguez (Ntra. Sra. de la Candelaria University Hospital), Fátima Herrera García  
15 (University Hospital of Canary Island), Félix Bonilla Aguiar (Dr. José Molina Hospital),  
16 Francisco Cabrera López (Insular University Hospital), Gloria Guerra de la Torre  
17 (Primary Care of Gran Canaria), Gregorio Muelas Martín (Dr. Negrín University  
18 Hospital), Héctor de la Rosa Merino (Canary Islands Health Research Institute  
19 Foundation, FIISC), Ignacio García Puente (Dr. Negrín University Hospital), Ignacio  
20 Llorente Gómez de Segura (Ntra. Sra. de la Candelaria University Hospital), Isabel García  
21 Calcerrada (Ntra. Sra. de la Candelaria University Hospital), Jacqueline Álvarez Pérez  
22 (Canary Islands Health Research Institute Foundation, FIISC), Jorge Federico Aldunate  
23 Page (Insular University Hospital), Jose Antonio García Dopico (University Hospital of  
24 Canary Island), Juan Andrés Báez Hernández (Primary Care of La Palma), Juan José  
25 Pérez Valencia (Primary Care of Tenerife), Julia Charlotte Wiebe (Dr. Negrín University  
26 Hospital), Lilisbeth Perestelo Pérez (Evaluation Unit, SESCS, Canary Islands Health  
27 Service, SCS), Leopoldo Martín Martín (Hospital General de La Palma), Luis Morcillo  
28 Herrera (University Hospital of Canary Island), Marcos Estupiñán Ramírez (Canary  
29 Islands Health Service, SCS), María Inmaculada González Pérez (Ntra. Sra. de la  
30 Candelaria University Hospital), María Isabel Visuerte Morales (University Hospital of  
31 Canary Island), María Pino Afonso Medina (Dr. Negrín University Hospital), Marta  
32 Riaño Ruiz (Insular University Hospital), Marta Tejera Santana (Dr. Negrín University  
33 Hospital), Mauro Boronat (Insular University Hospital), Mercedes Lorenzo Medina (Dr.  
34 Negrín University Hospital), Miguel Juan Mora García (Primary Care of Gran Canaria),  
35 Nayra Pérez Delgado (Ntra. Sra. de la Candelaria University Hospital), Pablo Pedrianez  
36 Martín (Dr. Negrín University Hospital), Pedro de Pablos- Velasco (Dr. Negrín

1  
2  
3 University Hospital), Pilar Peláez Alba (La Laguna University), Rafael Valcárcel  
4 (Primary Care of Tenerife), Remedios Castro Sánchez (Primary Care of Gran Canaria),  
5 Rodrigo Abreu González (Ntra. Sra. de la Candelaria University Hospital), Rosa Borges  
6 Trujillo (Dr. Negrín University Hospital), Víctor Lorenzo Sellarés (University Hospital  
7 of Canary Island).  
8  
9  
10  
11  
12  
13  
14  
15  
16  
17  
18  
19  
20  
21  
22  
23  
24  
25  
26  
27  
28  
29  
30  
31  
32  
33  
34  
35  
36  
37  
38  
39  
40  
41  
42  
43  
44  
45  
46  
47  
48  
49  
50  
51  
52  
53  
54  
55  
56  
57  
58  
59  
60

For peer review only



**REFERENCES**

1. Renders CM, Valk GD, Griffin SJ, et al. Interventions to improve the management of diabetes in primary care, outpatient, and community settings: a systematic review. *Diabetes Care* 2001;24:1821-1833. doi:10.2337/diacare.24.10.1821. PMID: 11574449.
2. Al Sayah F, Majumdar SR, Williams B, et al. Health literacy and health outcomes in diabetes: a systematic review. *J Gen Intern Med* 2013;28:444-52. doi: 10.1007/s11606-012-2241-z. PMID: 23065575.
3. Pouwer F, Nefs G, Nouwen A. Adverse effects of depression on glycemic control and health outcomes in people with diabetes: a review. *Endocrinol Metab Clin North Am* 2013;42:529-544. doi: 10.1016/j.ecl.2013.05.002. PMID: 24011885.
4. Peyrot M, Rubin RR, Lauritzen T, et al. Patient and provider perceptions of care for diabetes: results of the cross-national DAWN Study. *Diabetologia* 2006;49:279-88. doi: 10.1007/s00125-005-0048-8. PMID: 16397792.
5. Skovlund SE, Lichtenberg TH, Hessler D, et al. Can the Routine Use of Patient-Reported Outcome Measures Improve the Delivery of Person-Centered Diabetes Care? A Review of Recent Developments and a Case Study. *Curr Diab Rep* 2019;19:84. doi:10.1007/s11892-019-1190-x. PMID: 31420754.
6. Borg S, Eeg-Olofsson K, Palaszewski B, et al. Patient-reported outcome and experience measures for diabetes: development of scale models, differences between patient groups and relationships with cardiovascular and diabetes complication risk factors, in a combined registry and survey study in Sweden. *BMJ Open* 2019;9:e025033. doi:10.1136/bmjopen-2018-025033. PMID: 30612113.
7. Chen YC, Li IC. Effectiveness of interventions using empowerment concept for patients with chronic disease: a systematic review. *JBI Libr Syst Rev* 2009;7:1179-1233. doi: 10.11124/01938924-200907270-00001. PMID: 27819885.
8. Aquino JA, Baldoni NR, Flôr CR, et al. Effectiveness of individual strategies for the empowerment of patients with diabetes mellitus: A systematic review with meta-analysis. *Prim Care Diabetes* 2018;12:97-110. doi:10.1016/j.pcd.2017.10.004. PMID: 29162491.
9. Baldoni NR, Aquino JA, Sanches-Giraud C, et al. Collective empowerment strategies for patients with Diabetes Mellitus: A systematic review and meta-analysis. *Prim Care Diabetes* 2017;11:201-211. doi:10.1016/j.pcd.2016.09.006. PMID: 27780683.
10. Haider R, Sudini L, Chow CK, et al. Mobile phone text messaging in improving glycaemic control for patients with type 2 diabetes mellitus: A systematic review and meta-analysis. *Diabetes Res Clin Pract* 2019;150:27-37. doi:10.1016/j.diabres.2019.02.022. PMID: 30822496.
11. Hou C, Xu Q, Diao S, et al. Mobile phone applications and self-management of diabetes: A systematic review with meta-analysis, meta-regression of 21 randomized trials and GRADE. *Diabetes Obes Metab* 2018;20:2009-2013. doi:10.1111/dom.13307. PMID: 29582538.

12. Ramallo-Fariña Y, García-Pérez L, Castilla-Rodríguez I, et al. Effectiveness and cost-effectiveness of knowledge transfer and behavior modification interventions in type 2 diabetes mellitus patients--the INDICA study: a cluster randomized controlled trial. *Implement Sci* 2015;10:47. doi:10.1186/s13012-015-0233-1. PMID: 25880498.
13. Ramallo-Fariña Y, García-Bello MA, García-Pérez L, et al. Effectiveness of Internet-Based Multicomponent Interventions for Patients and Health Care Professionals to Improve Clinical Outcomes in Type 2 Diabetes Evaluated Through the INDICA Study: Multiarm Cluster Randomized Controlled Trial. *JMIR Mhealth Uhealth* 2020;8:e18922. doi:10.2196/18922. PMID: 33136059.
14. García-Pérez L, Ramallo-Fariña Y, Vallejo-Torres L, et al. Cost-effectiveness of multicomponent interventions in type 2 diabetes mellitus in a cluster randomized controlled trial: the INDICA Study. *Primary Care Diabetes*.
15. De Rekeneire N, Resnick HE, Schwartz AV, et al. Diabetes is associated with subclinical functional limitation in nondisabled older individuals: the Health, Aging, and Body Composition study. *Diabetes Care* 2003;26:3257-3263. doi:10.2337/diacare.26.12.3257. PMID: 14633811.
16. Selvin E, Coresh J, Golden SH, et al. Glycemic control and coronary heart disease risk in persons with and without diabetes: the atherosclerosis risk in communities study. *Arch Intern Med* 2005;165:1910-1916. doi:10.1001/archinte.165.16.1910. PMID: 16157837.
17. Diabetes Control and Complications Trial Research Group, Nathan DM, Genuth S, et al. The effect of intensive treatment of diabetes on the development and progression of long-term complications in insulin-dependent diabetes mellitus. *N Engl J Med* 1993;329:977-986. doi:10.1056/NEJM199309303291401. PMID: 8366922.
18. Intensive blood-glucose control with sulphonylureas or insulin compared with conventional treatment and risk of complications in patients with type 2 diabetes (UKPDS 33). UK Prospective Diabetes Study (UKPDS) Group [published correction appears in *Lancet* 1999 Aug 14;354:602]. *Lancet* 1998;352:837-853. doi: [https://doi.org/10.1016/S0140-6736\(98\)07019-6](https://doi.org/10.1016/S0140-6736(98)07019-6)
19. Katon WJ, Rutter C, Simon G, et al. The association of comorbid depression with mortality in patients with type 2 diabetes. *Diabetes Care* 2005;28:2668-2672. doi:10.2337/diacare.28.11.2668. PMID: 16249537.
20. Eastman RC, Javitt JC, Herman WH, et al. Model of complications of NIDDM. II. Analysis of the health benefits and cost-effectiveness of treating NIDDM with the goal of normoglycemia. *Diabetes Care* 1997;20:735-744. doi:10.2337/diacare.20.5.735. PMID: 9135935.
21. Goldney RD, Phillips PJ, Fisher LJ, et al. Diabetes, depression, and quality of life: a population study. *Diabetes Care* 2004;27:1066-1070. doi:10.2337/diacare.27.5.1066. PMID: 15111522.
22. Michie S, Johnston M, Francis J, et al. From theory to intervention: mapping theoretically derived behavioural determinants to behaviour change techniques. *Appl Psychol* 2008;57:660-680. <https://doi.org/10.1111/j.1464-0597.2008.00341.x>

- 1
  - 2
  - 3
  - 4
  - 5
  - 6
  - 7
  - 8
  - 9
  - 10
  - 11
  - 12
  - 13
  - 14
  - 15
  - 16
  - 17
  - 18
  - 19
  - 20
  - 21
  - 22
  - 23
  - 24
  - 25
  - 26
  - 27
  - 28
  - 29
  - 30
  - 31
  - 32
  - 33
  - 34
  - 35
  - 36
  - 37
  - 38
  - 39
  - 40
  - 41
  - 42
  - 43
  - 44
  - 45
  - 46
  - 47
  - 48
  - 49
  - 50
  - 51
  - 52
  - 53
  - 54
  - 55
  - 56
  - 57
  - 58
  - 59
  - 60
23. Anderson RM, Fitzgerald JT, Gruppen LD, et al. The Diabetes Empowerment Scale-Short Form (DES-SF). *Diabetes Care* 2003;26:1641-1642. doi:10.2337/diacare.26.5.1641-a. PMID: 12716841.
24. Martínez-González MA, García-Arellano A, Toledo E, et al. A 14-item Mediterranean diet assessment tool and obesity indexes among high-risk subjects: the PREDIMED trial. *PLoS One* 2012;7:e43134. doi:10.1371/journal.pone.0043134. PMID: 22905215.
25. Morisky DE, Green LW, Levine DM. Concurrent and predictive validity of a self-reported measure of medication adherence. *Med Care* 1986;24:67-74. doi:10.1097/00005650-198601000-00007. PMID: 3945130.
26. Spielberger CD, Gorsuch RL, Lushene R. *Manual del Cuestionario de Ansiedad Estado-Rasgo (STAI)*. Madrid: TEA Ediciones, 1982.
27. Beck AT, Ward CH, Mendelson M, et al. An inventory for measuring depression. *Arch Gen Psychiatry* 1961;4:561-571. doi:10.1001/archpsyc.1961.01710120031004. PMID: 13688369.
28. Fisher L, Glasgow RE, Mullan JT, et al. Development of a brief diabetes distress screening instrument. *Ann Fam Med* 2008;6:246-252. doi:10.1370/afm.842. PMID: 18474888.
29. Bradley C, Todd C, Gorton T, et al. The development of an individualized questionnaire measure of perceived impact of diabetes on quality of life: the ADDQoL. *Qual Life Res* 1999;8:79-91. doi:10.1023/a:1026485130100. PMID: 10457741.
30. Feldman EL, Stevens MJ, Thomas PK, et al. A practical two-step quantitative clinical and electrophysiological assessment for the diagnosis and staging of diabetic neuropathy. *Diabetes Care* 1994;17:1281-1289. doi:10.2337/diacare.17.11.1281. PMID: 7821168.
31. Finucane MM, Samet JH, Horton NJ. Translational methods in biostatistics: linear mixed effect regression models of alcohol consumption and HIV disease progression over time. *Epidemiol Perspect Innov* 2007;4:8. doi:10.1186/1742-5573-4-8. PMID: 17880699.
32. White IR, Royston P, Wood AM. Multiple imputation using chained equations: Issues and guidance for practice. *Stat Med* 2011;30:377-399. doi:10.1002/sim.4067. PMID: 21225900.
33. Enders CK. *Applied Missing Data Analysis*. New York, NY, The Guilford Press, 2010. ISBN: 9781606236390
34. StataCorp. 2017. *Stata Statistical Software: Release 15*. College Station, TX: StataCorp LLC.
35. Wu Y, Yao X, Vespasiani G, et al. Correction: Mobile App-Based Interventions to Support Diabetes Self-Management: A Systematic Review of Randomized Controlled Trials to Identify Functions Associated with Glycemic Efficacy. *JMIR Mhealth Uhealth* 2018;6:e20. doi: 10.2196/mhealth.8789. PMID: 29334479.

- 1  
2  
3 36. Hartmann-Boyce J, Chepkin SC, Ye W, et al. Nicotine replacement therapy versus  
4 control for smoking cessation. *Cochrane Database Syst Rev* 2018;5:CD000146.  
5 doi:10.1002/14651858.CD000146.pub5. PMID: 29852054.  
6  
7 37. Légaré F, Adekpedjou R, Stacey D, et al. Interventions for increasing the use of  
8 shared decision making by healthcare professionals. *Cochrane Database Syst Rev*  
9 2018;7:CD006732. doi:10.1002/14651858.CD006732.pub4. PMID: 30025154.  
10  
11 38. Medical Advisory Secretariat. Behavioural interventions for type 2 diabetes: an  
12 evidence-based analysis. *Ont Health Technol Assess Ser* 2009;9:1-45. PMID:  
13 23074526.  
14  
15 39. Peters RM, Lui M, Patel K, et al. Improving Glycemic Control With a Standardized  
16 Text-Message and Phone-Based Intervention: A Community Implementation. *JMIR*  
17 *Diabetes* 2017;2:e15. doi:10.2196/diabetes.7910. PMID: 30291063.  
18  
19 40. Masson SC, Tejani AM. Minimum clinically important differences identified for  
20 commonly used depression rating scales. *J Clin Epidemiol* 2013;66:805-807.  
21 doi:10.1016/j.jclinepi.2013.01.010. PMID: 23618794.  
22  
23  
24  
25  
26  
27  
28  
29  
30  
31  
32  
33  
34  
35  
36  
37  
38  
39  
40  
41  
42  
43  
44  
45  
46  
47  
48  
49  
50  
51  
52  
53  
54  
55  
56  
57  
58  
59  
60

Table 1. Adjusted difference in the mean of each group compared to the control group

|                                                                                                          | 6 Months               | P value     | 12 Months              | P value          | 18 Months             | P value          | 24 Months              | P value          |
|----------------------------------------------------------------------------------------------------------|------------------------|-------------|------------------------|------------------|-----------------------|------------------|------------------------|------------------|
| <b>Cognitive-attitudinal outcomes</b>                                                                    |                        |             |                        |                  |                       |                  |                        |                  |
| <b>Knowledge (DIATEK):</b> F=47.3 P<0.001; ICC PHCP =0.06; ICC subject PHCP=0.35                         |                        |             |                        |                  |                       |                  |                        |                  |
| PTI                                                                                                      | -                      | -           | 0.64 (0.17 to 1.11)    | <b>0.007</b>     | -                     | -                | 0.65 (0.2 to 1.11)     | <b>0.005</b>     |
| PFI                                                                                                      | -                      | -           | -0.38 (-0.85 to 0.09)  | 0.11             | -                     | -                | -0.6 (-1.06 to -0.14)  | <b>0.01</b>      |
| CBI                                                                                                      | -                      | -           | 0.63 (0.16 to 1.11)    | <b>0.008</b>     | -                     | -                | 0.34 (-0.12 to 0.8)    | 0.15             |
| <b>Empowerment (DES-SF):</b> F=17.3 P<0.001; ICC PHCP =0.08; ICC; subject PHCP=0.08                      |                        |             |                        |                  |                       |                  |                        |                  |
| PTI                                                                                                      | -                      | -           | 1.58 (-0.59 to 3.75)   | 0.15             | -                     | -                | 3.04 (1.08 to 4.99)    | <b>0.002</b>     |
| PFI                                                                                                      | -                      | -           | 3.95 (1.9 to 6)        | <b>&lt;0.001</b> | -                     | -                | 1.84 (-0.11 to 3.79)   | 0.07             |
| CBI                                                                                                      | -                      | -           | 3.97 (1.9 to 6.04)     | <b>&lt;0.001</b> | -                     | -                | 2.63 (0.68 to 4.58)    | <b>0.008</b>     |
| <b>Behavioral outcomes</b>                                                                               |                        |             |                        |                  |                       |                  |                        |                  |
| <b>Adherence dietary recommendations (MEDAS):</b> F=25.0 P<0.001; ICC PHCP = 0.03; ICC subject PHCP=0.20 |                        |             |                        |                  |                       |                  |                        |                  |
| PTI                                                                                                      | 0.22 (-0.25 to 0.69)   | 0.36        | 0.71 (0.17 to 1.24)    | <b>0.01</b>      | 0.93 (0.46 to 1.41)   | <b>&lt;0.001</b> | 0.87 (0.4 to 1.35)     | <b>&lt;0.001</b> |
| PFI                                                                                                      | -0.58 (-1.04 to -0.11) | <b>0.01</b> | -0.96 (-1.46 to -0.47) | <b>&lt;0.001</b> | 0.17 (-0.31 to 0.64)  | 0.49             | 0.03 (-0.44 to 0.5)    | 0.90             |
| CBI                                                                                                      | 0.44 (-0.03 to 0.91)   | 0.06        | 0.06 (-0.47 to 0.58)   | 0.83             | 0.88 (0.4 to 1.35)    | <b>&lt;0.001</b> | 0.7 (0.22 to 1.17)     | <b>0.004</b>     |
| <b>Medication adherence (MGLS):</b> F=14.4 P<0.001; ICC PHCP =0.04; ICC subject PHCP=0.20                |                        |             |                        |                  |                       |                  |                        |                  |
| PTI                                                                                                      | 0.09 (-0.11 to 0.3)    | 0.37        | 0.09 (-0.12 to 0.3)    | 0.39             | 0.13 (-0.09 to 0.34)  | 0.24             | 0.16 (-0.04 to 0.36)   | 0.12             |
| PFI                                                                                                      | 0.01 (-0.2 to 0.22)    | 0.90        | -0.13 (-0.34 to 0.08)  | 0.24             | -0.06 (-0.26 to 0.15) | 0.58             | 0.09 (-0.11 to 0.3)    | 0.39             |
| CBI                                                                                                      | 0.03 (-0.18 to 0.24)   | 0.77        | -0.19 (-0.41 to 0.03)  | 0.08             | 0 (-0.21 to 0.21)     | 0.98             | -0.1 (-0.31 to 0.11)   | 0.36             |
| <b>Affective outcomes</b>                                                                                |                        |             |                        |                  |                       |                  |                        |                  |
| <b>Depression (BDI-II):</b> F=53.6 P<0.001; ICC PHCP = 0.05; ICC subject PHCP=0.34                       |                        |             |                        |                  |                       |                  |                        |                  |
| PTI                                                                                                      | -                      | -           | -1.91 (-3.99 to 0.17)  | 0.07             | -                     | -                | -0.76 (-2.68 to 1.16)  | 0.44             |
| PFI                                                                                                      | -                      | -           | -2.99 (-4.99 to -1)    | <b>0.003</b>     | -                     | -                | 0.37 (-1.56 to 2.3)    | 0.71             |
| CBI                                                                                                      | -                      | -           | -3 (-5.13 to -0.87)    | <b>0.006</b>     | -                     | -                | 0.23 (-1.73 to 2.19)   | 0.82             |
| <b>Anxiety (STAI-S):</b> F=36.0 P<0.001; ICC PHCP =0.07 ICC; subject PHCP=0.32                           |                        |             |                        |                  |                       |                  |                        |                  |
| PTI                                                                                                      | -                      | -           | -2.25 (-5.75 to 1.25)  | 0.21             | -                     | -                | -2.18 (-5.54 to 1.18)  | 0.20             |
| PFI                                                                                                      | -                      | -           | -3.47 (-6.95 to 0.02)  | <b>0.05</b>      | -                     | -                | -0.39 (-3.78 to 2.99)  | 0.82             |
| CBI                                                                                                      | -                      | -           | -5.4 (-8.99 to -1.81)  | <b>0.003</b>     | -                     | -                | -0.50 (-3.9 to 2.9)    | 0.77             |
| <b>Distress (DDS2):</b> F=14.9 P<0.001; ICC PHCP =.05 ICC; subject PHCP=0.25                             |                        |             |                        |                  |                       |                  |                        |                  |
| PTI                                                                                                      | -                      | -           | -0.23 (-0.53 to 0.07)  | 0.13             | -                     | -                | -0.34 (-0.62 to -0.07) | <b>0.01</b>      |
| PFI                                                                                                      | -                      | -           | -0.24 (-0.53 to 0.05)  | 0.10             | -                     | -                | -0.31 (-0.58 to -0.04) | <b>0.03</b>      |

|                                                                                                           |                       |      |                        |                  |                       |             |                       |      |
|-----------------------------------------------------------------------------------------------------------|-----------------------|------|------------------------|------------------|-----------------------|-------------|-----------------------|------|
| CBI                                                                                                       | -                     | -    | -0.36 (-0.65 to -0.07) | <b>0.01</b>      | -                     | -           | -0.24 (-0.51 to 0.03) | 0.08 |
| <b>Health-related quality of life and symptoms</b>                                                        |                       |      |                        |                  |                       |             |                       |      |
| <b>Health-related quality of life (ADDQoL-19):</b> F=25.3 P<0.001; ICC PHCP = 0.04; ICC subject PHCP=0.34 |                       |      |                        |                  |                       |             |                       |      |
| PTI                                                                                                       | 0.09 (-0.24 to 0.42)  | 0.60 | 0.40 (0.04 to 0.76)    | <b>0.03</b>      | 0.39 (0.05 to 0.72)   | <b>0.02</b> | 0.16 (-0.17 to 0.48)  | 0.34 |
| PFI                                                                                                       | -0.09 (-0.42 to 0.23) | 0.56 | 0.51 (0.16 to 0.86)    | <b>0.005</b>     | -0.02 (-0.35 to 0.31) | 0.89        | -0.06 (-0.38 to 0.26) | 0.71 |
| CBI                                                                                                       | 0.03 (-0.3 to 0.35)   | 0.88 | 0.84 (0.49 to 1.18)    | <b>&lt;0.001</b> | 0.21 (-0.13 to 0.54)  | 0.23        | -0.05 (-0.38 to 0.28) | 0.77 |
| <b>Neuropathic symptom (MNSI):</b> F=59.8 P<0.001; ICC PHCP =0.02 ICC; subject PHCP=0.32                  |                       |      |                        |                  |                       |             |                       |      |
| PTI                                                                                                       | -                     | -    | -0.35 (-0.8 to 0.09)   | 0.12             | -                     | -           | -0.08 (-0.49 to 0.33) | 0.70 |
| PFI                                                                                                       | -                     | -    | -0.42 (-0.87 to 0.03)  | 0.07             | -                     | -           | 0.35 (-0.07 to 0.78)  | 0.11 |
| CBI                                                                                                       | -                     | -    | -0.57 (-1.04 to -0.1)  | <b>0.02</b>      | -                     | -           | 0.31 (-0.12 to 0.74)  | 0.16 |

The models were adjusted by the baseline value of dependent variables and time elapsed since diagnosis.

CBI, is a combined intervention for patients and professionals; ICC, Intraclass correlation coefficient; PFI, Intervention only for healthcare professionals at primary care; PTI, Intervention only for patients and family members; PHCP, Primary Care Health Practices.

Table 2. Adjusted means for each group and intragroup differences compared with the baseline measurement (cognitive-attitudinal, behavioral and affective outcomes)

|                                                  | Adjusted means in each group (95%CI) |                     |                        |                     |                        | Difference in intragroup of adjusted means compared to baseline (95%CI) |                  |                          |                  |                          |                  |                          |                  |
|--------------------------------------------------|--------------------------------------|---------------------|------------------------|---------------------|------------------------|-------------------------------------------------------------------------|------------------|--------------------------|------------------|--------------------------|------------------|--------------------------|------------------|
|                                                  | Baseline                             | 6 Months            | 12 Months              | 18 Months           | 24 Months              | B-6M                                                                    | P value          | B-12M                    | P value          | B-18M                    | P value          | B-24M                    | P value          |
| <b>Cognitive-attitudinal outcomes</b>            |                                      |                     |                        |                     |                        |                                                                         |                  |                          |                  |                          |                  |                          |                  |
| <b>Knowledge (DIATEK)</b>                        |                                      |                     |                        |                     |                        |                                                                         |                  |                          |                  |                          |                  |                          |                  |
| PTI                                              | 6.4<br>(6.3 to 6.5)                  | -                   | 7.2<br>(6.9 to 7.5)    | -                   | 7.4<br>(7.1 to 7.7)    | -                                                                       | -                | 0.82<br>(0.48 to 1.2)    | <b>&lt;0.001</b> | -                        | -                | 1.03<br>(0.71 to 1.36)   | <b>&lt;0.001</b> |
| PFI                                              | 6.5<br>(6.3 to 6.7)                  | -                   | 6.2<br>(5.8 to 6.5)    | -                   | 6.1<br>(5.8 to 6.5)    | -                                                                       | -                | -0.31<br>(-0.63 to 0.02) | 0.07             | -                        | -                | -0.32<br>(-0.64 to 0.01) | 0.058            |
| CBI                                              | 6.5<br>(6.4 to 6.6)                  | -                   | 7.2<br>(6.8 to 7.5)    | -                   | 7.1<br>(6.8 to 7.4)    | -                                                                       | -                | 0.7<br>(0.36 to 1.03)    | <b>&lt;0.001</b> | -                        | -                | 0.6<br>(0.27 to 0.94)    | <b>&lt;0.001</b> |
| UC                                               | 6.2<br>(6.1 to 6.3)                  | -                   | 6.5<br>(6.2 to 6.9)    | -                   | 6.7<br>(6.4 to 7.1)    | -                                                                       | -                | 0.3<br>(-0.04 to 0.63)   | <b>0.08</b>      | -                        | -                | 0.5<br>(0.18 to 0.82)    | <b>0.002</b>     |
| <b>Empowerment (DES-SF)</b>                      |                                      |                     |                        |                     |                        |                                                                         |                  |                          |                  |                          |                  |                          |                  |
| PTI                                              | 26.4<br>(25.8 to 27.0)               | -                   | 29.5<br>(27.9 to 31.0) | -                   | 33.5<br>(32.1 to 34.9) | -                                                                       | -                | 3.08<br>(1.6 to 4.6)     | <b>&lt;0.001</b> | -                        | -                | 7.1<br>(5.7 to 8.5)      | <b>&lt;0.001</b> |
| PFI                                              | 26.3<br>(25.2 to 27.4)               | -                   | 31.9<br>(30.5 to 33.2) | -                   | 32.3<br>(30.9 to 33.7) | -                                                                       | -                | 5.6<br>(4.2 to 6.9)      | <b>&lt;0.001</b> | -                        | -                | 6.02<br>(4.7 to 7.4)     | <b>&lt;0.001</b> |
| CBI                                              | 27.6<br>(27.0 to 28.3)               | -                   | 31.9<br>(30.4 to 33.3) | -                   | 33.1<br>(31.7 to 34.5) | -                                                                       | -                | 4.3<br>(2.8 to 5.7)      | <b>&lt;0.001</b> | -                        | -                | 5.7<br>(4.1 to 6.9)      | <b>&lt;0.001</b> |
| UC                                               | 26.1<br>(25.5 to 26.7)               | -                   | 27.9<br>(26.4 to 29.4) | -                   | 30.5<br>(29.1 to 31.8) | -                                                                       | -                | 1.8<br>(0.26 to 3.3)     | <b>0.02</b>      | -                        | -                | 4.3<br>(2.9 to 5.7)      | <b>&lt;0.001</b> |
| <b>Behavioral outcomes</b>                       |                                      |                     |                        |                     |                        |                                                                         |                  |                          |                  |                          |                  |                          |                  |
| <b>Adherence dietary recommendations (MEDAS)</b> |                                      |                     |                        |                     |                        |                                                                         |                  |                          |                  |                          |                  |                          |                  |
| PTI                                              | 8<br>(7.8 to 8.1)                    | 7.6<br>(7.2 to 7.9) | 9.1<br>(8.7 to 9.4)    | 8.3<br>(7.9 to 8.6) | 8.7<br>(8.3 to 9)      | -0.43<br>(-0.77 to -0.09)                                               | <b>0.01</b>      | 1.1<br>(0.71 to 1.5)     | <b>&lt;0.001</b> | 0.27<br>(-0.07 to 0.62)  | 0.12             | 0.68<br>(0.34 to 1.02)   | <b>&lt;0.001</b> |
| PFI                                              | 8.2<br>(7.9 to 8.5)                  | 6.8<br>(6.4 to 7.1) | 7.4<br>(7.1 to 7.7)    | 7.5<br>(7.1 to 7.8) | 7.8<br>(7.5 to 8.2)    | -1.5<br>(-1.8 to -1.1)                                                  | <b>&lt;0.001</b> | -0.82<br>(-1.2 to -0.49) | <b>&lt;0.001</b> | -0.82<br>(-1.2 to -0.49) | <b>&lt;0.001</b> | -0.4<br>(-0.74 to -0.07) | <b>0.018</b>     |
| CBI                                              | 8.3<br>(8.1 to 8.5)                  | 7.8<br>(7.4 to 8.1) | 8.4<br>(8.0 to 8.8)    | 8.2<br>(7.9 to 8.5) | 8.5<br>(8.1 to 8.8)    | -0.51<br>(-0.84 to -0.17)                                               | <b>0.003</b>     | 0.13<br>(-0.24 to 0.51)  | 0.49             | -0.08<br>(-0.43 to 0.26) | 0.63             | 0.2<br>(-0.14 to 0.54)   | 0.26             |
| UC                                               | 8.02<br>(7.9 to 8.2)                 | 7.3<br>(7.0 to 7.7) | 8.4<br>(8.0 to 8.7)    | 7.3<br>(7.0 to 7.7) | 7.8<br>(7.5 to 8.1)    | -0.69<br>(-1.0 to -0.36)                                                | <b>&lt;0.001</b> | 0.34<br>(-0.02 to 0.7)   | 0.07             | -0.7<br>(-1.0 to -0.37)  | <b>&lt;0.001</b> | -0.24<br>(-0.57 to 0.1)  | 0.16             |
| <b>Medication adherence (MGLS)</b>               |                                      |                     |                        |                     |                        |                                                                         |                  |                          |                  |                          |                  |                          |                  |
| PTI                                              | 3.1                                  | 3.5                 | 3.6                    | 3.6                 | 3.6                    | 0.41                                                                    | <b>&lt;0.001</b> | 0.45                     | <b>&lt;0.001</b> | 0.5                      | <b>&lt;0.001</b> | 0.48                     | <b>&lt;0.001</b> |

|                            |                        |                     |                        |                     |                        |                        |              |                           |                  |                        |                  |                           |                  |
|----------------------------|------------------------|---------------------|------------------------|---------------------|------------------------|------------------------|--------------|---------------------------|------------------|------------------------|------------------|---------------------------|------------------|
|                            | (3.1 to 3.2)           | (3.4 to 3.7)        | (3.4 to 3.7)           | (3.5 to 3.8)        | (3.5 to 3.7)           | (0.26 to 0.56)         |              | (0.29 to 0.6)             |                  | (0.35 to 0.65)         |                  | (0.33 to 0.62)            |                  |
| PFI                        | 3.3<br>(3.2 to 3.3)    | 3.5<br>(3.3 to 3.6) | 3.3<br>(3.2 to 3.5)    | 3.4<br>(3.3 to 3.6) | 3.5<br>(3.4 to 3.7)    | 0.18<br>(0.03 to 0.33) | <b>0.02</b>  | 0.08<br>(-0.07 to 0.22)   | 0.32             | 0.16<br>(0.02 to 0.31) | <b>0.026</b>     | 0.25<br>(0.11 to 0.4)     | <b>0.001</b>     |
| CBI                        | 3.3<br>(3.3 to 3.3)    | 3.5<br>(3.3 to 3.6) | 3.3<br>(3.1 to 3.4)    | 3.5<br>(3.3 to 3.6) | 3.3<br>(3.2 to 3.5)    | 0.17<br>(0.02 to 0.32) | <b>0.02</b>  | -0.01<br>(-0.18 to 0.15)  | 0.87             | 0.2<br>(0.05 to 0.35)  | <b>0.01</b>      | 0.04<br>(-0.11 to 0.2)    | 0.60             |
| UC                         | 3.2<br>(3.1 to 3.3)    | 3.4<br>(3.3 to 3.6) | 3.5<br>(3.3 to 3.6)    | 3.5<br>(3.3 to 3.6) | 3.4<br>(3.3 to 3.6)    | 0.23<br>(0.08 to 0.38) | <b>0.002</b> | 0.27<br>(0.12 to 0.42)    | <b>&lt;0.001</b> | 0.29<br>(0.14 to 0.43) | <b>&lt;0.001</b> | 0.23<br>(0.08 to 0.37)    | <b>0.002</b>     |
| <b>Affective outcomes</b>  |                        |                     |                        |                     |                        |                        |              |                           |                  |                        |                  |                           |                  |
| <b>Depression (BDI-II)</b> |                        |                     |                        |                     |                        |                        |              |                           |                  |                        |                  |                           |                  |
| PTI                        | 10.9<br>(10.4 to 11.5) | -                   | 8.5<br>(7.1 to 9.9)    | -                   | 6.1<br>(4.7 to 7.5)    | -                      | -            | -2.4<br>(-3.7 to -0.96)   | <b>0.001</b>     | -                      | -                | -4.9<br>(-6.2 to -3.5)    | <b>&lt;0.001</b> |
| PFI                        | 11.0<br>(9.9 to 12.1)  | -                   | 7.5<br>(6.1 to 8.8)    | -                   | 7.2<br>(5.8 to 8.6)    | -                      | -            | -3.6<br>(-4.9 to -2.2)    | <b>&lt;0.001</b> | -                      | -                | -3.8<br>(-5.2 to -2.4)    | <b>&lt;0.001</b> |
| CBI                        | 11.7<br>(10.9 to 12.4) | -                   | 7.5<br>(5.9 to 8.9)    | -                   | 7.1<br>(5.7 to 8.5)    | -                      | -            | -4.2<br>(-5.7 to -2.7)    | <b>&lt;0.001</b> | -                      | -                | -4.6<br>(-5.9 to -3.1)    | <b>&lt;0.001</b> |
| UC                         | 11.4<br>(10.9 to 11.9) | -                   | 10.5<br>(8.9 to 11.9)  | -                   | 6.7<br>(5.5 to 8.2)    | -                      | -            | -0.94<br>(-2.4 to 0.55)   | 0.22             | -                      | -                | -4.5<br>(-5.9 to -3.2)    | <b>&lt;0.001</b> |
| <b>Anxiety (STAI-S)</b>    |                        |                     |                        |                     |                        |                        |              |                           |                  |                        |                  |                           |                  |
| PTI                        | 21.5<br>(20.7 to 22.2) | -                   | 18.4<br>(15.9 to 20.9) | -                   | 14.5<br>(12.0 to 16.9) | -                      | -            | -3.0<br>(-5.5 to -0.55)   | <b>0.017</b>     | -                      | -                | -7<br>(-9.4 to -4.6)      | <b>&lt;0.001</b> |
| PFI                        | 20.6<br>(18.8 to 22.4) | -                   | 17.2<br>(14.8 to 19.6) | -                   | 16.2<br>(13.8 to 18.7) | -                      | -            | -3.4<br>(-5.8 to -1)      | <b>0.006</b>     | -                      | -                | -4.4<br>(-6.8 to -1.9)    | <b>&lt;0.001</b> |
| CBI                        | 23.2<br>(22.0 to 24.3) | -                   | 15.3<br>(12.8 to 17.8) | -                   | 16.1<br>(13.7 to 18.6) | -                      | -            | -7.9<br>(-10.4 to -5.4)   | <b>&lt;0.001</b> | -                      | -                | -7.0<br>(-9.5 to -4.6)    | <b>&lt;0.001</b> |
| UC                         | 21.9<br>(21.2 to 22.7) | -                   | 20.7<br>(18.1 to 23.2) | -                   | 16.6<br>(14.3 to 19.0) | -                      | -            | -1.3<br>(-3.8 to 1.3)     | 0.32             | -                      | -                | -5.3<br>(-7.7 to -2.9)    | <b>&lt;0.001</b> |
| <b>Distress (DDS2)</b>     |                        |                     |                        |                     |                        |                        |              |                           |                  |                        |                  |                           |                  |
| PTI                        | 2.8<br>(2.6 to 2.8)    | -                   | 1.9<br>(1.7 to 2.2)    | -                   | 1.6<br>(1.4 to 1.8)    | -                      | -            | -0.72<br>(-0.93 to -0.51) | <b>&lt;0.001</b> | -                      | -                | -1.1<br>(-1.2 to -0.86)   | <b>&lt;0.001</b> |
| PFI                        | 2.5<br>(2.3 to 2.6)    | -                   | 1.9<br>(1.8 to 2.1)    | -                   | 1.7<br>(1.5 to 1.9)    | -                      | -            | -0.5<br>(-0.7 to -0.31)   | <b>&lt;0.001</b> | -                      | -                | -0.79<br>(-0.98 to -0.6)  | <b>&lt;0.001</b> |
| CBI                        | 2.7<br>(2.6 to 2.8)    | -                   | 1.8<br>(1.6 to 2.0)    | -                   | 1.7<br>(1.5 to 1.9)    | -                      | -            | -0.91<br>(-1.1 to -0.71)  | <b>&lt;0.001</b> | -                      | -                | -1.01<br>(-1.2 to -0.82)  | <b>&lt;0.001</b> |
| UC                         | 2.6<br>(2.5 to 2.6)    | -                   | 2.1<br>(1.9 to 2.4)    | -                   | 1.97<br>(1.8 to 2.2)   | -                      | -            | -0.36<br>(-0.58 to -0.15) | <b>0.001</b>     | -                      | -                | -0.58<br>(-0.77 to -0.39) | <b>&lt;0.001</b> |

The models were adjusted by the baseline value of dependent variables and time elapsed since diagnosis.

B, baseline; CBI, is a combined intervention for patients and professionals; M, month; PFI, Intervention only for healthcare professionals at primary care; PTI, Intervention only for patients and family members; UC, usual care or control group.



1  
2  
3  
4  
5  
6  
7  
8  
9  
10  
11  
12  
13  
14  
15  
16  
17  
18  
19  
20  
21  
22  
23  
24  
25  
26  
27  
28  
29  
30  
31  
32  
33  
34  
35  
36  
37  
38  
39  
40  
41  
42  
43  
44  
45  
46

Table 3. Proportion of patients who stop smoking at each follow up compared to the control group

|                  | PTI (n=114) | PFI (n=156) | CBI (n=109) | UC (n=145) | <i>P</i> value global | <i>P</i> value PTI vs UC | <i>P</i> value PFI vs UC | <i>P</i> value CBI vs UC |
|------------------|-------------|-------------|-------------|------------|-----------------------|--------------------------|--------------------------|--------------------------|
| <b>3 Months</b>  | 12.8        | 8.7         | 15.4        | 10.4       | 0.54                  | 0.99                     | 0.99                     | 0.99                     |
| <b>6 Months</b>  | 28.5        | 7.5         | 24.2        | 15.4       | 0.003                 | 0.11                     | 0.22                     | 0.99                     |
| <b>12 Months</b> | 33.1        | 17.4        | 28.4        | 14.3       | 0.014                 | 0.018                    | 0.99                     | 0.11                     |
| <b>18 Months</b> | 36.7        | 19.6        | 37.6        | 18.8       | 0.004                 | 0.04                     | 0.99                     | 0.03                     |
| <b>24 Months</b> | 41.5        | 23.4        | 42.3        | 21.2       | 0.002                 | 0.012                    | 0.99                     | 0.012                    |

Only basal smokers are included in the analysis.

CBI, is a combined intervention for patients and professionals; PFI, Intervention only for healthcare professionals at primary care; PTI, Intervention only for patients and family members; UC, usual care or control group.

For peer review only

Table 4. Adjusted means for each group and intragroup differences compared with the baseline measurement (health-related quality of life and symptoms)

|                                                    | Adjusted means in each group (95%CI) |                         |                          |                          |                           | Difference in intragroup of adjusted means compared to baseline (95%CI) |         |                           |         |                        |         |                           |         |
|----------------------------------------------------|--------------------------------------|-------------------------|--------------------------|--------------------------|---------------------------|-------------------------------------------------------------------------|---------|---------------------------|---------|------------------------|---------|---------------------------|---------|
|                                                    | Baseline                             | 6 Months                | 12 Months                | 18 Months                | 24 Months                 | B-6M                                                                    | P value | B-12M                     | P value | B-18M                  | P value | B-24M                     | P value |
| <b>Health-related quality of life and symptoms</b> |                                      |                         |                          |                          |                           |                                                                         |         |                           |         |                        |         |                           |         |
| <b>Health-related quality of life (ADDQoL-19)</b>  |                                      |                         |                          |                          |                           |                                                                         |         |                           |         |                        |         |                           |         |
| PTI                                                | -1.7<br>(-1.8 to -1.6)               | -1.0<br>(-1.3 to -0.8)  | -1.2<br>(-1.5 to -0.97)  | -0.85<br>(-1.1 to -0.61) | -0.76<br>(-0.99 to -0.53) | 0.69<br>(0.46 to 0.93)                                                  | <0.001  | 0.52<br>(0.27 to 0.76)    | <0.001  | 0.89<br>(0.65 to 1.1)  | <0.001  | 0.97<br>(0.74 to 1.2)     | <0.001  |
| PFI                                                | -1.7<br>(-1.8 to -1.5)               | -1.2<br>(-1.5 to -1)    | -1.1<br>(-1.3 to -0.88)  | -1.3<br>(-1.5 to -1.0)   | -0.98<br>(-1.2 to -0.75)  | 0.43<br>(0.21 to 0.66)                                                  | <0.001  | 0.55<br>(0.32 to 0.78)    | <0.001  | 0.4<br>(0.17 to 0.63)  | 0.001   | 0.68<br>(0.45 to 0.9)     | <0.001  |
| CBI                                                | -1.8<br>(-1.9 to -1.6)               | -1.1<br>(-1.3 to -0.87) | -0.78<br>(-1.0 to -0.54) | -1.0<br>(-1.3 to -0.79)  | -0.97<br>(-1.2 to -0.73)  | 0.65<br>(0.42 to 0.88)                                                  | <0.001  | 0.98<br>(0.74 to 1.2)     | <0.001  | 0.73<br>(0.49 to 0.96) | <0.001  | 0.78<br>(0.54 to 1.0)     | <0.001  |
| UC                                                 | -2.1<br>(-2.2 to -1.9)               | -1.1<br>(-1.4 to -0.9)  | -1.6<br>(-1.9 to -1.4)   | -1.2<br>(-1.5 to -1)     | -0.92<br>(-1.2 to -0.69)  | 0.92<br>(0.7 to 1.2)                                                    | <0.001  | 0.44<br>(0.18 to 0.7)     | 0.001   | 0.82<br>(0.59 to 1.1)  | <0.001  | 1.1<br>(0.9 to 1.4)       | <0.001  |
| <b>Neuropathic symptom (MNSI)</b>                  |                                      |                         |                          |                          |                           |                                                                         |         |                           |         |                        |         |                           |         |
| PTI                                                | 3.1<br>(3 to 3.2)                    | -                       | 2.8<br>(2.5 to 3.1)      | -                        | 2.4<br>(2.1 to 2.7)       | -                                                                       | -       | -0.29<br>(-0.61 to 0.02)  | 0.07    | -                      | -       | -0.69<br>(-0.99 to -0.4)  | <0.001  |
| PFI                                                | 3.3<br>(3.0 to 3.6)                  | -                       | 2.8<br>(2.5 to 3.1)      | -                        | 2.9<br>(2.5 to 3.2)       | -                                                                       | -       | -0.55<br>(-0.86 to -0.23) | 0.001   | -                      | -       | -0.45<br>(-0.76 to -0.13) | 0.005   |
| CBI                                                | 3.3<br>(3.1 to 3.4)                  | -                       | 2.6<br>(2.3 to 2.9)      | -                        | 2.8<br>(2.5 to 3.1)       | -                                                                       | -       | -0.67<br>(-1.0 to -0.31)  | <0.001  | -                      | -       | -0.46<br>(-0.78 to -0.13) | 0.006   |
| UC                                                 | 3.3<br>(3.2 to 3.5)                  | -                       | 3.1<br>(2.9 to 3.5)      | -                        | 2.5<br>(2.2 to 2.8)       | -                                                                       | -       | -0.15<br>(-0.47 to 0.17)  | 0.36    | -                      | -       | -0.82<br>(-1.1 to -0.54)  | <0.001  |

The models were adjusted by the baseline value of dependent variables and time elapsed since diagnosis.

B, baseline; CBI, is a combined intervention for patients and professionals; M, month; PFI, Intervention only for healthcare professionals at primary care; PTI, Intervention only for patients and family members; UC, usual care or control group

Table 5. Patient satisfaction with the intervention received (only those who made use of each intervention component)

|                                                          | n   | mean (95%CI)        |
|----------------------------------------------------------|-----|---------------------|
| <b>Conventional group educational program</b>            |     |                     |
| <i>Usability</i>                                         |     |                     |
| Environment generated                                    | 592 | 9.53 (9.46 to 9.60) |
| Exchange of experiences with participants and educator   | 588 | 9.59 (9.53 to 9.66) |
| Educator's work                                          | 587 | 9.79 (9.74 to 9.83) |
| Quality of materials                                     | 587 | 9.56 (9.49 to 9.64) |
| <i>Personal satisfaction</i>                             |     |                     |
| The sessions helped me get to know my diabetes better    | 591 | 9.67 (9.61 to 9.73) |
| I found the sessions useful                              | 593 | 9.60 (9.52 to 9.67) |
| The sessions motivated me to look after my health better | 590 | 9.62 (9.55 to 9.69) |
| <i>General</i>                                           |     |                     |
| General satisfaction                                     | 589 | 9.70 (9.65 to 9.76) |
| I would recommend the sessions                           | 588 | 9.77 (9.72 to 9.82) |
| <b>Website platform</b>                                  |     |                     |
| <i>Usability</i>                                         |     |                     |
| Access to the content                                    | 253 | 8.30 (8.02 to 8.58) |
| Usability of the web                                     | 251 | 8.59 (8.33 to 8.85) |
| Patient outcomes follow up charts                        | 215 | 8.37 (8.03 to 8.72) |
| Quality of materials                                     | 229 | 8.81 (8.53 to 9.08) |
| Access to videos of the sessions                         | 216 | 8.76 (8.47 to 9.05) |
| <i>General</i>                                           |     |                     |
| General satisfaction                                     | 237 | 8.56 (8.30 to 8.82) |
| I would recommend using the website                      | 239 | 8.81 (8.56 to 9.05) |
| <b>Semi-automated mobile phone messages</b>              |     |                     |
| <i>Usability</i>                                         |     |                     |
| Reading SMS                                              | 585 | 9.51 (9.41 to 9.61) |
| Usefulness of reminders                                  | 576 | 9.33 (9.22 to 9.45) |
| <i>Personal satisfaction</i>                             |     |                     |
| They adapt to my needs                                   | 579 | 9.04 (8.90 to 9.18) |
| They motivate me to look after myself                    | 576 | 9.15 (9.02 to 9.28) |
| I would like to continue receiving them                  | 552 | 8.80 (8.59 to 9.00) |
| <i>General</i>                                           |     |                     |
| General satisfaction                                     | 572 | 9.23 (9.09 to 9.37) |

Table 6. Significant differences compared to usual care for the three intervention groups.

|                              | PTI       |           | PFI       |           | CBI       |           |
|------------------------------|-----------|-----------|-----------|-----------|-----------|-----------|
|                              | 12 months | 24 months | 12 months | 24 months | 12 months | 24 months |
| <b>Cognitive/attitudinal</b> |           |           |           |           |           |           |
| Knowledge (DIATEK)           | **        | **        |           | ↓**       | **        |           |
| Empowerment (DES)            |           | **        | ***       |           | ***       | **        |
| <b>Behavioural</b>           |           |           |           |           |           |           |
| Diet (MEDAS)                 | **        | ***       | ↓***      |           |           | **        |
| Adherence (MGLS)             |           |           |           |           |           |           |
| Smoking                      | *         | *         |           |           | *         | *         |
| <b>Affective</b>             |           |           |           |           |           |           |
| Depression (BDI-II)          |           |           | **        |           | **        |           |
| Anxiety (STAI-S)             |           |           | *         |           | **        |           |
| Diabetes Distress (DDS2)     |           | **        |           | *         | **        |           |
| <b>HRQOL</b>                 |           |           |           |           |           |           |
| HRQoL (ADDQoL-19)            | *         |           | **        |           | ***       |           |
| Neuropathy (MNSI)            |           |           |           |           | *         |           |

↓ represent worsening compare to usual care.

\* $P \leq 0.05$ .

\*\* $P \leq 0.01$ .

\*\*\* $P \leq 0.001$ .

CBI, is a combined intervention for patients and professionals; PFI, Intervention only for healthcare professionals at primary care; PTI, Intervention only for patients and family members; UC, usual care or control group.



236x214mm (96 x 96 DPI)



## CONSORT 2010 checklist of information to include when reporting a randomised trial\*

| Section/Topic                    | Item No | Checklist item                                                                                                                                                                              | Reported on page No        |
|----------------------------------|---------|---------------------------------------------------------------------------------------------------------------------------------------------------------------------------------------------|----------------------------|
| <b>Title and abstract</b>        |         |                                                                                                                                                                                             |                            |
|                                  | 1a      | Identification as a randomised trial in the title                                                                                                                                           | 1                          |
|                                  | 1b      | Structured summary of trial design, methods, results, and conclusions (for specific guidance see CONSORT for abstracts)                                                                     | 2                          |
| <b>Introduction</b>              |         |                                                                                                                                                                                             |                            |
| Background and objectives        | 2a      | Scientific background and explanation of rationale                                                                                                                                          | 4                          |
|                                  | 2b      | Specific objectives or hypotheses                                                                                                                                                           | 4-5                        |
| <b>Methods</b>                   |         |                                                                                                                                                                                             |                            |
| Trial design                     | 3a      | Description of trial design (such as parallel, factorial) including allocation ratio                                                                                                        | 6                          |
|                                  | 3b      | Important changes to methods after trial commencement (such as eligibility criteria), with reasons                                                                                          |                            |
| Participants                     | 4a      | Eligibility criteria for participants                                                                                                                                                       | 6                          |
|                                  | 4b      | Settings and locations where the data were collected                                                                                                                                        | 6                          |
| Interventions                    | 5       | The interventions for each group with sufficient details to allow replication, including how and when they were actually administered                                                       | 7-8                        |
| Outcomes                         | 6a      | Completely defined pre-specified primary and secondary outcome measures, including how and when they were assessed                                                                          | 8-9                        |
|                                  | 6b      | Any changes to trial outcomes after the trial commenced, with reasons                                                                                                                       | n.a.                       |
| Sample size                      | 7a      | How sample size was determined                                                                                                                                                              | See the published protocol |
|                                  | 7b      | When applicable, explanation of any interim analyses and stopping guidelines                                                                                                                | n.a.                       |
| <b>Randomisation:</b>            |         |                                                                                                                                                                                             |                            |
| Sequence generation              | 8a      | Method used to generate the random allocation sequence                                                                                                                                      | 7                          |
|                                  | 8b      | Type of randomisation; details of any restriction (such as blocking and block size)                                                                                                         | 7                          |
| Allocation concealment mechanism | 9       | Mechanism used to implement the random allocation sequence (such as sequentially numbered containers), describing any steps taken to conceal the sequence until interventions were assigned | 7                          |
| Implementation                   | 10      | Who generated the random allocation sequence, who enrolled participants, and who assigned participants to                                                                                   | 7                          |

|    |                                                      |               |                                                                                                                                                   |
|----|------------------------------------------------------|---------------|---------------------------------------------------------------------------------------------------------------------------------------------------|
| 1  |                                                      | interventions |                                                                                                                                                   |
| 2  | Blinding                                             | 11a           | If done, who was blinded after assignment to interventions (for example, participants, care providers, those assessing outcomes) and how          |
| 3  |                                                      |               | n.a.                                                                                                                                              |
| 4  |                                                      | 11b           | If relevant, description of the similarity of interventions                                                                                       |
| 5  | Statistical methods                                  | 12a           | Statistical methods used to compare groups for primary and secondary outcomes                                                                     |
| 6  |                                                      | 12b           | Methods for additional analyses, such as subgroup analyses and adjusted analyses                                                                  |
| 7  |                                                      |               | n.a.                                                                                                                                              |
| 8  | <b>Results</b>                                       |               |                                                                                                                                                   |
| 9  | Participant flow (a diagram is strongly recommended) | 13a           | For each group, the numbers of participants who were randomly assigned, received intended treatment, and were analysed for the primary outcome    |
| 10 |                                                      | 13b           | For each group, losses and exclusions after randomisation, together with reasons                                                                  |
| 11 | Recruitment                                          | 14a           | Dates defining the periods of recruitment and follow-up                                                                                           |
| 12 |                                                      | 14b           | Why the trial ended or was stopped                                                                                                                |
| 13 | Baseline data                                        | 15            | A table showing baseline demographic and clinical characteristics for each group                                                                  |
| 14 |                                                      |               | See the clinical outcomes paper published                                                                                                         |
| 15 |                                                      |               |                                                                                                                                                   |
| 16 | Numbers analysed                                     | 16            | For each group, number of participants (denominator) included in each analysis and whether the analysis was by original assigned groups           |
| 17 |                                                      |               | Figure 1                                                                                                                                          |
| 18 | Outcomes and estimation                              | 17a           | For each primary and secondary outcome, results for each group, and the estimated effect size and its precision (such as 95% confidence interval) |
| 19 |                                                      | 17b           | For binary outcomes, presentation of both absolute and relative effect sizes is recommended                                                       |
| 20 | Ancillary analyses                                   | 18            | Results of any other analyses performed, including subgroup analyses and adjusted analyses, distinguishing pre-specified from exploratory         |
| 21 |                                                      |               |                                                                                                                                                   |
| 22 | Harms                                                | 19            | All important harms or unintended effects in each group (for specific guidance see CONSORT for harms)                                             |
| 23 |                                                      |               |                                                                                                                                                   |
| 24 | <b>Discussion</b>                                    |               |                                                                                                                                                   |
| 25 | Limitations                                          | 20            | Trial limitations, addressing sources of potential bias, imprecision, and, if relevant, multiplicity of analyses                                  |
| 26 | Generalisability                                     | 21            | Generalisability (external validity, applicability) of the trial findings                                                                         |
| 27 | Interpretation                                       | 22            | Interpretation consistent with results, balancing benefits and harms, and considering other relevant evidence                                     |
| 28 |                                                      |               | 16-17                                                                                                                                             |
| 29 |                                                      |               | 14-16                                                                                                                                             |
| 30 |                                                      |               | 17                                                                                                                                                |
| 31 | <b>Other information</b>                             |               |                                                                                                                                                   |
| 32 | Registration                                         | 23            | Registration number and name of trial registry                                                                                                    |
| 33 | Protocol                                             | 24            | Where the full trial protocol can be accessed, if available                                                                                       |
| 34 |                                                      |               | 2                                                                                                                                                 |
| 35 |                                                      |               | <a href="https://implement">https://implement</a>                                                                                                 |

---

entationsci  
ce.biomedcen  
tral.com/articl  
es/10.1186/s1  
3012-015-  
0233-1

---

1  
2  
3  
4  
5  
6  
7  
8 **Funding**                      25    Sources of funding and other support (such as supply of drugs), role of funders

---

18

9  
10  
11 \*We strongly recommend reading this statement in conjunction with the CONSORT 2010 Explanation and Elaboration for important clarifications on all the items. If relevant, we also  
12 recommend reading CONSORT extensions for cluster randomised trials, non-inferiority and equivalence trials, non-pharmacological treatments, herbal interventions, and pragmatic trials.  
13 Additional extensions are forthcoming: for those and for up to date references relevant to this checklist, see [www.consort-statement.org](http://www.consort-statement.org).  
14  
15  
16  
17  
18  
19  
20  
21  
22  
23  
24  
25  
26  
27  
28  
29  
30  
31  
32  
33  
34  
35  
36  
37  
38  
39  
40  
41  
42
